# 1      **The Opiliones Tree of Life: shedding light on harvestmen** 2                      **relationships through transcriptomics**

3  
4                      Rosa Fernández<sup>a,\*</sup>, Prashant Sharma<sup>b</sup>, Ana L. M. Tourinho<sup>a,c</sup>, Gonzalo Giribet<sup>a,\*</sup>

5  
6      *<sup>a</sup> Museum of Comparative Zoology, Department of Organismic and Evolutionary Biology,*  
7      *Harvard University, 26 Oxford Street, Cambridge, MA 02138, USA; <sup>b</sup> Department of Zoology,*  
8      *University of Wisconsin-Madison, 352 Birge Hall, 430 Lincoln Drive, Madison, WI 53706, USA; <sup>c</sup>*  
9      *Instituto Nacional de Pesquisas da Amazônia, Coordenação de Biodiversidade (CBIO), Avenida*  
10     *André Araújo, 2936, Aleixo, CEP 69011-970, Manaus, Amazonas, Brazil*

11  
12      \* rfernandezgarcia@g.harvard.edu

13      \*\* ggiribet@g.harvard.edu  
14

## Abstract

Opiliones are iconic arachnids with a Paleozoic origin and a diversity that reflects ancient biogeographical patterns dating back at least to the times of Pangea. Due to interest in harvestman diversity, evolution and biogeography, their relationships have been thoroughly studied using morphology and PCR-based Sanger approaches to systematics. More recently, two studies utilized transcriptomics-based phylogenomics to explore their basal relationships and diversification, but sampling was limiting for understanding deep evolutionary patterns, as they lacked good taxon representation at the family level. Here we analyze a set of the 14 existing transcriptomes with 40 additional ones generated for this study, representing ca. 80% of the extant familial diversity in Opiliones. Our phylogenetic analyses, including a set of data matrices with different gene occupancy and evolutionary rates, and using a multitude of methods correcting for a diversity of factors affecting phylogenomic data matrices, provide a robust and stable Opiliones tree of life, where most families are precisely placed. Our dating analyses also using alternative calibration points, methods, and analytical parameters provide well-resolved old divergences, consistent with ancient regionalization in Pangea in some groups, and Pangean vicariance in others. The integration of state-of-the-art molecular techniques and analyses, together with the broadest taxonomic sampling to date presented in a phylogenomic study of harvestmen, provide new insights into harvestmen interrelationships, as well as a general overview of the general biogeographic patterns of this ancient arthropod group.

## Introduction

Opiliones are a remarkable group of arachnids (Figs 1–2), with a fossil record dating to the Early Devonian having diversified in its main lineages by the Carboniferous (Dunlop et al., 2003; Dunlop, 2007; Garwood et al., 2014), showing ancient vicariant patterns that accord with their modern distribution (Boyer et al., 2007; Giribet and Kury, 2007; Clouse and Giribet, 2010; Giribet et al., 2012a; Giribet and Sharma, 2015). They show fascinating reproductive behaviors, including paternal and biparental care (Machado, 2007; Machado and Macías-Ordóñez, 2007; Requena et al., 2012; Buzatto et al., 2014).

The phylogeny of the order Opiliones and its four extant suborders—Cyphophthalmi, Eupnoi, Dyspnoi and Laniatores—has received considerable attention, based on morphological (Martens, 1976, 1980; Martens et al., 1981; Shultz, 1998; Giribet and Dunlop, 2005), molecular (Shultz and Regier, 2001; Giribet et al., 2010; Hedin et al., 2010; Groh and Giribet, 2015), and combined data sets (Giribet et al., 1999; Giribet et al., 2002; Garwood et al., 2014). After some debate, the relationships among the Opiliones suborders have been settled, with Cyphophthalmi constituting the sister group of Phalangida, the latter divided in Palpatores (Eupnoi + Dyspnoi) and Laniatores. More recently, a few studies have used phylogenomic data derived from transcriptomes to further test relationships among Opiliones (Hedin et al., 2012a; Sharma and Giribet, 2014; Sharma et al., 2014), but these pioneering studies included a handful of species (8 to 14) representing just a few families. Likewise, the internal relationships of each of the four suborders have received attention, mostly using molecular (Boyer et al., 2007; Sharma and Giribet, 2011; Richart and Hedin, 2013; Schönhofe et al., 2013; Groh and Giribet, 2015) and combined analyses of morphology and molecules (Giribet et al., 2012a). Other morphological analyses have focused on particular suborders (Shear, 1980; Shear and Gruber, 1983; Shear, 1986; Hunt and Cokendolpher, 1991). Recently a proposal for a Dyspnoi phylogeny, not based on data analyses, has been presented (Schönhofe, 2013). In addition, dozens of papers have explored the relationships of individual families or groups of closely related species (for some recent examples, see Schönhofe et al., 2013; Derkarabetian and Hedin, 2014; Pinto-da-Rocha et al., 2014; Vélez et al., 2014; Boyer et al., 2015; Schönhofe et al., 2015; Giribet et al., 2016; Richart et al., 2016). We can thus say that the phylogenetic understanding of Opiliones is on the right track, but some key nodes are yet to be resolved with confidence.

While many aspects of the phylogeny of Opiliones are now well understood, a few remain largely unresolved or understudied. For example, within Cyphophthalmi, the relationships among its six families, and even the monophyly of Sironidae, remain unsettled (Giribet et al., 2012a). Relationships within Eupnoi—the group that includes the true “daddy-long-legs”—are barely explored from a molecular perspective (see Hedin et al., 2012b; Vélez et al., 2014; Groh and Giribet, 2015), and no study has included all the relevant diversity. Resolution within these clades is poorly understood, with the exception of the deepest division between Caddoidea and Phalangioidea (Groh and Giribet, 2015). Relationships within Dyspnoi are beginning to settle (Richart and Hedin, 2013; Schönhöfer et al., 2013; Richart et al., 2016), but for example, only recently it was recognized that Acropsopilionidae are related to Dyspnoi and not to Eupnoi (Groh and Giribet, 2015), based on a handful of Sanger-sequenced molecular markers. This resulted in transferring a clade of Opiliones from Eupnoi to Dyspnoi, as the sister group to all other members (Ischyropsalidoidea + Troguloidea), and therefore deserves further testing using a modern and more complete data set. Finally, relationships within Laniatores have changed considerably after the study of Sharma and Giribet (2011), as the taxonomy of this large clade of Opiliones has been in flux, with description of several families in recent years (Sharma and Giribet, 2011; Sharma et al., 2011; Kury, 2014; Bragagnolo et al., 2015b). Some novel results include the proposal of a sister group relationship of the New Zealand endemic family Synthetonychiidae to all other Laniatores (Giribet et al., 2010; Sharma and Giribet, 2011)—a result hinged on partial data from a single species. In addition, the relationships among many families of Insidiatores and Grassatores remain unstable.

Recent application of dense taxon sampling using large numbers of genes through modern phylogenomic approaches (e.g., based on genome and Illumina-based data sets) has resolved family-level relationships of a diversity of groups of arachnids (Bond et al., 2014; Fernández et al., 2014a; Fernández and Giribet, 2015; Sharma et al., 2015) and other arthropods (Misof et al., 2014; Fernández et al., 2016). We applied these methodologies to Opiliones phylogenetics to produce a densely sampled family-level phylogeny by analyzing 54 harvestman transcriptomes (40 newly generated for this study and 14 previously published) representing 40 of the 50 currently recognized extant families (80% familial representation).



# Materials and Methods

## Specimens

Specimens of Opiliones selected for this study were collected in a diversity of locales, including major trips to the Brazilian Amazon, Europe, North America and New Zealand, and complemented by smaller trips to other localities and by donations of specimens by colleagues. Taxonomic and geographic details of the represented species and accession codes are available in Table 1; additional information on the specimens can be found in the Museum of Comparative Zoology's online database MCZbase (<http://mczbase.mcz.harvard.edu>) by using the MCZ accession numbers.

Collected specimens were preserved in RNAlater and transferred to liquid nitrogen upon arrival to the laboratory and subsequently stored at -80 °C or, if brought alive to the laboratory, directly flash frozen in liquid nitrogen and preserved in -80 °C. Total RNA was extracted with TRIzol (Life Sciences) and mRNA was purified with the Dynabeads mRNA Purification Kit (Invitrogen) following manufacturer's instructions. cDNA libraries were constructed in the Apollo 324 automated system using the PrepX mRNA kit (IntegenX) and sequenced in-house at the FAS Center for Systems Biology in an Illumina Hi-Seq 2500 with a read length of 150 base pairs. Further details about the protocols can be found elsewhere (Fernández et al., 2014b; Fernández et al., 2016).

Our final matrix comprises 54 taxa, including 10 Cyphophthalmi (4 families included; Ogoveidae and Troglosironidae missing), 9 Eupnoi (representatives of all 5 families included), 9 Dyspnoi (all 8 families included), and 26 Laniatores (representatives of 23 families included; missing Gerdesiidae, Guasiniidae, Icaleptidae, Kimulidae, Metasarcidae, Nippononychidae, Pyramidopidae, and Tithaeidae, all families of relatively narrow distribution in places difficult to access). As outgroups, we included several chelicerates (*Anoplodactylus insignis*, *Limulus polyphemus*, *Synsphyronus apimelus*, *Tetranychus urticae*, *Liphistius malayanus*, *Eremobates* sp., *Centruroides sculpturatus*, *Ricinoides karschii* and *Pseudocellus pearsei*), one crustacean (*Daphnia pulex*), one myriapod (*Scutigera coleoptrata*) and one onychophoran (*Peripatopsis obervergiensis*) (Table 1).

All raw sequences are deposited in the SRA archive of GenBank under accession numbers specified in Table 1. Data on specimens are available from MCZbase (<http://mczbase.mcz.harvard.edu>).

# *Orthology assignment and matrix construction*

Orthology assignment was based on the OMA algorithm version 0.99.z3 (Altenhoff et al., 2013), as specified in detail in our previous work (Fernández et al., 2014b).

Orthologous genes were aligned with MUSCLE (Edgar, 2004). Probabilistic alignment masking of each orthologous gene was done with ZORRO (Wu et al., 2012), and positions below a confidence threshold of 5 (see Fernández et al., 2014b) were removed from the alignments.

A first approach to matrix construction based on gene occupancy was followed (Hejnol et al., 2009). These include matrices with >90%, >75% and 50% gene occupancy (a gene occupancy of 50% means that an OMA orthologous group is selected if present in at least 50% of the taxa), resulting in three matrices with 78 genes (matrix I), 305 genes (matrix II) and 1,550 genes (matrix III), respectively.

Additionally we explored subsets of 100 genes with different evolutionary rates (measured as percentage of identical sites), as in Fernández et al. (2014a). From the 1,550-gene matrix, we selected the 100 least conserved genes (matrix IV), the 100 that had an evolutionary rate closest to the mean observed in this data set (varying from 27.9 to 28.4% of identical sites; matrix V), and the 100 least conserved genes (matrix VI). Information about the number of amino acids and the percentage of missing data for each matrix can be found in S1 Table.

# *Phylogenetic analyses*

Maximum likelihood inference was conducted with PhyML-PCMA (Zoller and Schneider, 2013), ExaML (Aberer and Stamatakis, 2013) and PhyML v.3.0.3 implementing the integrated branch length flag (i.e., this approach integrates branch length over a wide range of scenarios, therefore allowing implementation of a further correction of heterotachy not considered by mixture models). Bootstrap support values were estimated with 100 replicates under the rapid bootstrapping algorithm (Stamatakis et al., 2008). In PhyML-PCMA, we selected 20 principal components and empirical amino acid frequencies. The per site rate category model was selected in ExaML.

Bayesian analyses were conducted with ExaBayes (Aberer et al., 2014) and PhyloBayes MPI 1.4e (Lartillot et al., 2013) using the site-heterogeneous CAT-GTR model of evolution in the latter software (Lartillot and Philippe, 2004). Two independent Markov chain Monte Carlo (MCMC) chains were run for > 5,000 cycles. The initial 20% trees sampled in each MCMC run prior to convergence (i.e., when maximum bipartition discrepancies across chains < 0.1) were discarded as the burn-in. A 50% majority-rule consensus tree was then computed from the remaining trees sampled every 10 cycles.

Compositional homogeneity of each gene and taxon was evaluated in BaCoCa (Kück and Struck, 2014). The relative composition frequency variability (RCFV) values (that measures the absolute deviation from the mean for each amino acid for each taxon) was plotted in a heatmap using the R package gplots with an R script modified from Kück and Struck (2014). None of the genes in any of the matrices showed any signs of compositional heterogeneity (i.e., RCFV values were lower than 0.025), therefore there was no need to eliminate them from our matrices (S1 Fig).

Due to computational constraints, and in order to improve the efficiency of our analyses, not all analyses were run for all the matrices (see Figs 3–4).

### *Molecular dating*

The fossil record of Opiliones is well documented, and most key fossils have been included in prior phylogenetic analyses, making their placement in a phylogenetic context precise. We mostly follow the strategy and fossil placement of Sharma and Giribet (2014), who conducted tip dating in one of their analyses. The oldest Opiliones fossil, *Eophalangium sheari*, from the Early Devonian Rhynie Cherts (Dunlop et al., 2003, 2004) is now interpreted as a member of the extant suborder Tetrophthalmi, together with *Hastocularis argus* from the Carboniferous Montceau-les-Mines Lagerstätte (Garwood et al., 2014). Tetrophthalmi is the putative sister group of Cyphophthalmi (Sharma and Giribet, 2014). *Eophalangium* had been originally interpreted as a stem Eupnoi, but now we use it as a minimum age for the origin of its sister group, Cyphophthalmi, which here corresponds to the node splitting Cyphophthalmi from Phalangida. Given how close this fossil is to the root of Opiliones we use a soft bound of 411 Ma for the floor of Opiliones. A second analysis was conducted considering the age of *Eophalangium* as the minimum age of Cyphophthalmi, based on the rationale explained above.

Two other key Carboniferous fossils (Garwood et al., 2011) are used to constrain the non-caddid Eupnoi (based on the modern-looking *Macrogyion cronus*) and the non-acropsopilionid Dyspnoi (based on *Ameticos scolos*), and applied soft bounds of 305 Ma to each of these clades.

Additional Eupnoi fossils from the Middle Jurassic (approx. 165 Mya) of Daohugou, Inner Mongolia, China are known (Huang et al., 2009), and one species, *Mesobunus dunlopi*, preserved the penis, allowing placement in Sclerosomatidae (Giribet et al., 2012b), and constraining the corresponding node to 165 Ma.

Other relevant fossils include Upper Cretaceous (lowermost Cenomanian, ca. 99 Ma) Burmese amber from Myanmar (Giribet and Dunlop, 2005; Poinar, 2008). *Petrobunoides sharmai* (Selden et al. 2016), placed in the extant family Epedanidae, was used as a constrain for the superfamily Epedanoidea. *Halitherses grimaldii* has been recently reinterpreted as a new family of uncertain affinities (Shear, 2010; Dunlop et al., 2016), and thus is of little help for dating, as an older fossil was already used to constrain the non-Acropsopilionidae Dyspnoi. *Paleosiro burmanicum* was originally described as a member of the Cyphophthalmi family Sironidae (Poinar, 2008), but it is of stylocellid affinities (Giribet et al., 2012a). Given the uncertain placement of the fossil within Stylocellidae and the presence of a single stylocellid terminal, we do not use it for node dating to avoid a “push towards the present” effect (see Giribet, 2015).

The split between Onychophora and Arthropoda was used to root the tree with a uniform prior of 528–558 Ma. The split between Xiphosura and Arachnida was constrained with a uniform prior of 465–485 Ma, based on the age of *Lunataspis aurora*. *Proscorpius osborni* was selected as being an anatomically well-understood Silurian scorpion (Whitfield 1885), setting a constraint on the split of Scorpiones from Tetrapulmonata.

Divergence dates were estimated using the Bayesian relaxed molecular clock approach as implemented in PhyloBayes v. 3.3f (Lartillot et al., 2013) under the autocorrelated lognormal and uncorrelated gamma multipliers models, resulting in four analyses (i.e., these two models were applied to both calibration configurations described above, with the age of *Eophalangium* as the minimum age of Cyphophthalmi or as the floor of Opiliones). Two independent MCMC chains were run for each analysis (10,000–12,000 cycles). The calibration constraints were used with soft bounds (Yang and Rannala, 2006) under a birth–death prior.

## Results and Discussion

All results are based on three original data matrices of 78 genes (matrix I; > 90% gene occupancy), 305 genes (matrix II; > 75% gene occupancy) and 1,550 genes (matrix III; > 50% gene occupancy), as well as subsets of these matrices (see Methods).

Figures 3–4 illustrate the topology obtained for the 78-gene matrix (matrix I) in PhyML\_PCMA, with a Navajo rug representing the support for the sixteen analyses conducted for the different matrices and methods (see Materials and Methods section and figure captions).

### *Higher-level Opiliones phylogenetics*

Our analyses recover a stable relationship among the four extant Opiliones suborders, each well supported as monophyletic in all the analyses (Fig. 3), as consistently found in a variety of published Opiliones analyses (e.g., Shultz, 1998; Shultz and Regier, 2001; Giribet et al., 2010; Hedin et al., 2012a; Sharma and Giribet, 2014; Sharma et al., 2014; Groh and Giribet, 2015), including phylogenomic ones (Hedin et al., 2012a; Sharma and Giribet, 2014; Sharma et al., 2014). However, most published analyses found little support for the resolution within each suborder—in Sanger-based analyses due to insufficient sequence data and in phylogenomic analyses due to few taxa. The resolved relationships within each of the four suborders are thus the most novel aspects of this study. Each suborder is therefore discussed in detail below.

### *Cyphophthalmi—the mite harvestmen*

The members of the suborder Cyphophthalmi (Fig. 1a–b) have received especial attention phylogenetically due to their antiquity, their global distribution, and their low vagility (e.g., Boyer et al., 2007; Giribet et al., 2012a). Here we confirm the division of Cyphophthalmi into the temperate Gondwanan family Pettalidae (Fig 1a) and the remaining families (Stylocellidae, Neogoveidae, Sironidae) (Figs 3–4), a divergence that took place around the Carboniferous (Fig 5). While the New Caledonian endemic Troglosironidae (12 spp. in the genus *Troglosiro*) and the West African endemic Ogoveidae (3 spp. in the genus

*Ogovea* from Cameroon, Gabon and Equatorial Guinea) were not included, their phylogenetic affinity to Neogoveidae in the clade Sternophthalmi is strongly supported by an array of morphological and molecular data sets (Giribet et al., 2012a), and is not discussed further here, as we lack phylogenomic data to test this clade.

Relationships among Stylocellidae, Neogoveidae and Sironidae (Fig 1b) are unstable, and two topologies prevail: (Stylocellidae, (Neogoveidae, Sironidae)) and (Sironidae, (Stylocellidae, Neogoveidae)), and neither topology supports the taxon Boreophtalmi, grouping Stylocellidae and Sironidae, as proposed by Giribet et al. (2012a) (Figs 3–4). The first topology is preferred by the most-complete data set. However, in some of the analyses using fewer genes the Stylocellidae species nest within Sironidae, albeit without support. These two alternatives will require further examination with more stylocellid samples, as the alternative topologies may also have an impact on the dating, which suggests an initial diversification around the Jurassic/Cretaceous boundary (Fig. 5).

Monophyly of Neogoveidae is recovered in all analyses, with the exception of the PhyloBayes analysis of the 78-gene matrix (Fig. 5). The placement of the North American *Metasiro* with the typical Neotropical neogoveids corroborates previous molecular hypotheses of the delimitation of this clade (Giribet et al., 2012a; Benavides and Giribet, 2013).

Monophyly of Sironidae (Fig. 1b), here represented by three genera of the three main lineages of this Laurasian family (*Siro*, *Parasiro*, and *Suzukielus*) is unstable across analyses (Fig. 4). Monophyly of Sironidae has been difficult to obtain in molecular analyses as well as with morphology due to differences in family-level characters in the Western Mediterranean *Parasiro* and the Japanese *Suzukielus* (Giribet et al., 2012a).

### *Eupnoi—the daddy-long-legs*

Family-level Eupnoi phylogenies are scarce (Giribet et al., 2012a; Hedin et al., 2012b; Groh and Giribet, 2015) and have typically undersampled southern hemisphere lineages. Our analyses support the well-known division of Caddoidea (Fig. 1c) and Phalangioidea (Fig. 1d–f), which in turn divides into the southern hemisphere Neopilionidae (Fig. 1d) and the mostly northern hemisphere families Phalangiidae (Fig. 1e), Sclerosomatidae (Fig. 1f) and Protolophidae—although Phalangiidae and Sclerosomatidae have later diversified in the Southern hemisphere (Figs 3–4). The sister group relationship

among Protolophidae and Sclerosomatidae has been found in previous analyses (Hedin et al., 2012b; Groh and Giribet, 2015), and in fact some have considered Protolophidae a junior synonym of Sclerosomatidae (Kury, 2013). However, resolution among the families of Phalangioidea has received little or no support in previous studies. Our results thus provide, for the first time, a well-resolved Eupnoi phylogeny, including the placement of *Gyas titanus* within Phalangidae, as suggested by Hedin et al. (2012b), instead of Sclerosomatidae. Unfortunately we were not able to include any members of the phylogenetically unstable "Metopilio group" (Giribet et al., 2010; Hedin et al., 2012b). We thus find Phalangioidea divided into three main clades: Neopilionidae, Sclerosomatidae/Protolophidae, and Phalangidae (including *Gyas*). However, the systematics of this large group of Opiliones, with nearly 200 genera and 1,800 species, will require much denser sampling before the group can be properly revised.

The division between the temperate Gondwanan Neopilionidae and the remaining species is well supported phylogenetically and biogeographically, as it is inferred to be Permian (Fig. 5).

#### *Dyspnoi*

The global phylogeny of Dyspnoi has received attention from different workers using morphology and molecules, but only recently there has been modern treatment. Groh and Giribet (2015) finally circumscribed the suborder, transferring Acropsopilionidae (Fig. 1g) from Eupnoi to the sister group of all other Dyspnoi (Ischyropsalidoidea [Fig. 1h] and Troguloidea [Fig. 1i]) based on molecular data analyses of a few Sanger-sequencing genes and morphological examination. Our phylogenomic datasets corroborate this topology, placing *Acropsopilio neozealandiae* (Fig. 1g) as the sister group to the other Dyspnoi, with the monophyly of each of Ischyropsalidoidea and Troguloidea being fully supported. While the position of *Halitherses grimaldii* remains uncertain, their large eyes, resembling those of caddids and acropsopilionids, and their troguloid facies (Shear, 2010) suggest a phylogenetic placement between Acropsopilionoidea and the remaining Dyspnoi (Dunlop et al., 2016), perhaps as sister group to Troguloidea or to Troguloidea + Ischyropsalidoidea, although the caddoid eyes are now found in Caddoidea, Phalangioidea (in the members of the genus *Hesperonemastoma*; see (Groh and Giribet, 2015)), and Acropsopilionoidea, and are thus best optimized as a symplesiomorphy of Palpatores.

The main division in Dyspnoi follows a biogeographic pattern, with Acropsopilionoidea mostly concentrating in the southern hemisphere, while the remaining Dyspnoi being circumscribed to Laurasia, a biogeographic pattern consistent the Carboniferous/Devonian split between these two lineages (Fig. 5).

# *Laniatores—the armored harvestmen*

The phylogeny of Laniatores has received recent attention at many levels (Giribet et al., 2010; Sharma and Giribet, 2011; Cruz-López et al., 2016; Sharma et al., 2016). In an unpublished thesis, Kury (1993) divided Laniatores into Insidiatores (Fig 2a–b) and Grassatores (Fig 2c–l), a division found here, but not in some studies that included a meaningful sampling of Laniatores (Giribet et al., 2010; Sharma and Giribet, 2011). These instead found the New Zealand endemic Synthetonychiidae (Fig 2a) to be the sister group to all other Laniatores (Eulaniatores *sensu* Kury (2015)), a result worth testing due to the partial nature of the included synthetonychiid sequences and the former placement of this family as sister group to Triaenonychidae. Of special interest was also the phylogenetic position of the unstable North American *Fumontana deprehendor* (Fig. 2b), a member of the mostly temperate Gondwanan family Triaenonychidae that was poorly resolved in prior studies. Our analyses do find a sister group of *Fumontana* to the representative of the southern hemisphere Triaenonychidae in virtually all analyses, with a Permian divergence (Fig. 5). *Synthetonychia* is either the sister group of the represented travunioids in most analyses (except for matrices IV and V; see Fig. 4), or sister group to Triaenonychidae in some analyses, as originally proposed by Forster (1954). Further discussion on Insidiatores will require increased diversity of genera both within Triaenonychidae and within the travunioid families (see for example Kury, 2013).

Resolution within Grassatores has remained elusive except for the recognition of a main division between Phalangodidae and the remaining Grassatores and of the superfamilies Gonyleptoidea, Assamioidea, Zalmoxoidea and Samooidea, and perhaps a clade of Southeast Asian families, Epedanoidea (Sharma and Giribet, 2011), although some of these clades were not supported in re-analyses of the Sharma & Giribet dataset (Cruz-López et al., 2016; Sharma et al., 2016). Here we find Phalangodidae (represented by *Sitalcina lobata*) to be the sister group of the remaining Grassatores, a result supported in all analyses conducted to date.



The SE Asian endemic Sandokanidae (Fig 2c) (Sharma and Giribet, 2009) is resolved as the sister group to the remaining families, the latter clade being supported by nearly all matrices and most analyses (only some analyses find this clade without support) (Fig 3). The position of Sandokanidae with respect to the other Grassatores families has been difficult to resolve in prior analyses (Giribet et al., 2010; Sharma and Giribet, 2011), which sometimes suggested a relationship to Epedanoidea. Here we reject this hypothesis and support Sandokanidae as the second offshoot of the Grassatores clade, i.e., (Phalangodidae, (Sandokanidae, remaining Grassatores)).

The sister group of Sandokanidae divide into the largely SE Asian Epedanoidea (represented here by members of Epedanidae, Petrobunidae and Podoctidae) and a clade including Assamioidea, Samooidea, Zalmoxioidea and Gonyleptoidea, this divergence being Cretaceous (Figs 6-7). This coincides with the first Laniatores fossils, which were already present in the terranes of today's Myanmar (Selden et al., 2016). Epedanoidea is monophyletic in all analyses (although sometimes without significant support), except for the PhyloBayes analysis of matrix VI (Fig. 4), and it is resolved with Epedanidae being sister group to a clade of Petrobunidae and Podoctidae (Fig 2d), although support for these relationships is not optimal (Fig 4; see also Sharma et al., 2016), as it may require additional taxa, including the missing family Tithaeidae and additional species. Epedanoidea has however been difficult to recover in a recent analysis focusing on Podoctidae (Sharma et al., 2016).

The sister group of Epedanoidea, a clade composed of Assamioidea–Zalmoxioidea–Samooidea–Gonyleptoidea is well supported in virtually all analyses (Fig 3). Internal resolution among these superfamilies had found conflict in prior studies (Giribet et al., 2010; Sharma and Giribet, 2011), as it probably required additional data to resolve this rapid radiation of Laniatores families. Phylogenomic data find the much-needed information to resolve this clade, here assigned a Cretaceous age (Figs 6-7).

A sister group relationship of *Dampetrus* (an assamiid, the only representative of Assamioidea included here) to Zalmoxioidea–Samooidea is found with all data matrices except V and VI, but does not receive support in most analyses with matrix I. Fewer genes seem to be necessary to support fully a clade of Zalmoxioidea and Samooidea, which was found in prior Sanger-based studies (Sharma and Giribet, 2011). However, Samooidea is paraphyletic with respect to Zalmoxioidea in about half of the analyses (Fig. 4), although in others both superfamilies are reciprocally monophyletic. The *bona fide* samooiid *Pellobunus*

from Panama (Fig 2f) is sister group to the remaining members of this clade, followed by a representative of biantidae *Metabiantes* from South Africa, and by a clade of Zalmoxoidea, including an Amazonian specimen we tentatively placed in the genus *Escadabius* (Escadabiidae) (Fig 2k), and then the representatives of Fissiphalliidae (*Fissiphallius martensi*; Fig 2e) and Zalmoxidae (*Zalmoxis*, *Pachylicus*). Except for the clade placing *Metabiantes* with the zalmoxoids, relationships within this clade are stable (Fig 4). Further samoooid and zalmoxoid missing families (Kimulidae, Stygnommatidae, Guasiniidae and Icaleptidae; all exclusively Neotropical) should be sampled to resolve the issue of the reciprocal monophyly of the families, and in fact, when a second stygnopsid was evaluated in the expanded data set (*Karos*), Samooidea was supported as a clade (Fig 5).

Gonyleptoidea (Fig 2g—j) is restricted to an expanded Neotropics (some species of gonyleptid make it into Patagonia and some cosmetids quite North into the USA). Stygnopsidae (*Chapulobunus*) is well supported as sister group to all other gonyleptoids, followed by Agoristenidae (*Avima*; Fig 2g), although in this case the position of Agoristenidae is not well resolved. Agoristenids had been proposed as the sister group of the non-stygnopsid gonyleptoids in previous analyses (Sharma and Giribet, 2011), as suggested here in some trees, but most matrices suggest a sister group relationship of Agoristenidae and Stygnopsidae. Stygnidae (*Protimesius*; Fig 2i) is well supported as sister group to all the remaining families, followed in a ladder-like fashion by the families Cryptogeobiidae (*Pseudopachylus*; Fig 2l), Cosmetidae (*Vonones*), Gonyleptidae (*Metagyndes*), Manaosbiidae (*Saramacia*; Fig 2h) and Cranidae (*Phareicranus*; Fig 2j). This topology is fully compatible with more detailed recent analyses of Gonyleptoidea (Kury, 2014; Pinto-da-Rocha et al., 2014; Bragagnolo et al., 2015a), some of which consider Manaosbiidae and Cranidae junior synonyms of Gonyleptidae (Pinto-da-Rocha et al., 2014), although this synonymy was not accepted in subsequent studies (Kury, 2014; Kury and Villarreal M, 2015). We thus support a clade including these three families, which has also been called GG or Greater Gonyleptidae (Kury, 2014; Kury and Villarreal M, 2015), but maintain the three families until this issue gets resolved.

Grassatores are much more abundant in the southern than in the northern hemisphere, and thus some authors have seen the former as a center of origin of the group. However, our analyses consistently resolve northern hemisphere clades at the base of the Grassatores tree (Figs 6-7), with the widespread family Phalangodidae splitting first, followed by the SE Asian Sandokanidae. The next clade in the tree divides into Epedanoidea,

comprising mostly SE Asian and Philippine families and a largely Neotropical clade (from the southern part of Gondwana). The southern hemisphere clade has extended into the northern hemisphere in a few cases, especially Cosmetidae, Podoctidae, Samoidae and Zalmoxidae, the latter three families well known for the ability of dispersing across oceanic barriers (Sharma and Giribet, 2012). While denser sampling should test the origin of Cosmetidae and Samoidae, it is clear that Zalmoxidae originated in the Neotropics.

#### *Molecular dating and general biogeographical patterns in Opiliones*

The molecular dating analyses for both calibration configurations (i.e., the age of *Eophalangium* as the floor of Opiliones or Cyphophthalmi) yielded very similar results, with the main differences obtained between the autocorrelated and uncorrelated model analyses within each calibration configuration (Fig S2). For purposes of conservatism, we discuss our results based on the chronogram under the uncorrelated gamma multipliers model using the age of *Eophalangium* as the minimum age of Cyphophthalmi (Fig 5).

Opiliones have been often used as examples of animals with ancient and conservative biogeographic patterns, therefore suitable for vicariance biogeographic analyses (Giribet and Kury, 2007; Giribet et al., 2010). One general pattern observed here is a division between temperate Gondwana (the terranes that were once directly connected to Antarctica) and the remaining landmasses, including, in some cases, clades currently in tropical Gondwana. This is for example the case of Cyphophthalmi, with a main division between the strictly temperate Gondwanan family Pettalidae and the remaining families (this including Laurasian and tropical Gondwanan clades), or in Dyspnoi, with Acropsopilionidae, being mostly distributed in temperate Gondwana, as the sister group to the rest of the families, restricted to the northern hemisphere. Within Eupnoi Caddidae is mostly Laurasian, but Phalangida once more divides into Neopilionidae, restricted to temperate Gondwana, and the remaining families, mostly Laurasian, although some secondarily extending southwards. Once more, Insidiatores, although somehow unresolved, finds a division between the predominantly temperate Gondwanan family Triaenonychidae (or Triaenonychidae + the New Zealand endemic Synthetonychiidae) and the northern hemisphere Insidiatores (Travunioidea). In addition, Triaenonychidae has a basal split between the northern hemisphere *Fumontana* and the temperate Gondwanan clade (although here it is represented by a single species). Further biogeographic studies on Triaenonychidae are currently underway. Laniatores depict several other interesting

patterns, including two clades of southeast Asian families, including Sandokanidae and  
Epedanoidea while the remaining species mostly appear to be of Tropical Gondwanan  
origins, with some remarkable cases of range expansions (e.g., trans-continental  
disjunctions in Assamiidae, Biantidae, Pyramidopidae, and Zalmoxidae; Sharma and Giribet,  
2011, 2012; Cruz-López et al., 2016).

Interestingly, the splits between Temperate Gondwana and the rest precede the  
breakup of Pangea (Fig 5), suggesting ancient regionalization across Pangea, as shown in  
other groups of terrestrial invertebrates (Murién et al., 2014) and in the early  
diversification of amphibians (San Mauro et al., 2005). Splits between tropical Gondwana  
and Laurasia, both in Cyphophthalmi and in Grassatores, seem to be much younger, and  
may be associated with the breakup of Pangea, possibly representing true  
Gondwanan/Laurasian vicariant events, and not the result of ancient cladogenesis and  
Pangean regionalization. This pattern would be more in agreement with the diversification  
of larger and more vagile organisms (e.g., dytiscid beetles; Bukontaite et al., 2014).

## Conclusions

Our analysis of a large number of novel transcriptomes has allowed us to propose a stable  
phylogeny of Opiliones (Fig 6). Such analyses of large data matrices have allowed us to place  
all superfamilies of Opiliones (and 80% of the families) in a resolved phylogenetic context,  
with only a few spots to be sorted out, these in areas of the tree of life where sampling was  
still limited. Our trees support most traditional relationships within Opiliones and resolve  
some recalcitrant familial relationships, such as a well-resolved Eupnoi phylogeny, the  
rejection of Boreophthalmi, the monophyly of Insidiatores, the monophyly of  
Triaenonychidae, and the placement of Stygnopsidae as the most basal family of  
Gonyleptoidea, among others. We also show that Opiliones exhibit some splits reflecting  
ancestral Pangean regionalization, whereas others conform with high fidelity to the  
sequence of Pangean fragmentation, therefore constituting ideal model systems to  
understand ancient biogeographic patterns.

## Acknowledgements

Many colleagues assisted with field work and samples, and we are indebted to all of them  
for their contribution of specimens and expertise, especially Jimmy Cabra, Ron Clouse, Pío

Colmenares, Jesús Alberto Cruz, Óscar Francke, Guilherme Gainett, Abel Pérez González, Gustavo Hormiga, Carlos Prieto, Ricardo Pinto-da-Rocha, Cristiano Sampaio Porto, Willians Porto, and Nobuo Tsurusaki. The following funding sources were used: NSF grant DEB-1457539: Collaborative Proposal: Phylogeny and diversification of the orb weaving spiders (Orbiculariae, Araneae) (GG); National Geographic Society Grant #9043-11: Re-discovering the mite harvestmen (Arachnida, Opiliones, Cyphophthalmi, Neogoveidae) of the Brazilian Amazonas (GG). Fieldwork to Chile and New Zealand was supported by Putnam expedition grants from the MCZ (GG RF); fieldwork to Reserva Ducke was supported by CAPES (ALT GG); fieldwork in the Philippines and Australia was supported by NSF DBI-1202751 to PPS, and in the Philippines by a National Geographic exploration grant to Ronald M. Clouse and PPS.

# **Author contributions**

Collected samples: RF, PPS, ALT, GG. Performed laboratory work and analyses: RF. Wrote the paper: RF, PPS, GG.

# **References**

- Aberer, A. J., Kobert, K., Stamatakis, A. 2014. ExaBayes: massively parallel Bayesian tree inference for the whole-genome era. *Mol. Biol. Evol.* 31, 2553-2556.
- Aberer, A. J., Stamatakis, A. 2013. ExaML: Exascale Maximum Likelihood. Program and documentation available at: <http://sco.h-its.org/exelixis/web/software/examl/index.html>.
- Altenhoff, A. M., Gil, M., Gonnet, G. H., Dessimoz, C. 2013. Inferring hierarchical orthologous groups from orthologous gene pairs. *PLoS One* 8, e53786.
- Benavides, L. R., Giribet, G. 2013. A revision of selected clades of Neotropical mite harvestmen (Arachnida, Opiliones, Cyphophthalmi, Neogoveidae) with the description of eight new species. *Bulletin of the Museum of Comparative Zoology* 161, 1-44.
- Bond, J. E., Garrison, N. L., Hamilton, C. A., Godwin, R. L., Hedin, M., Agnarsson, I. 2014. Phylogenomics resolves a spider backbone phylogeny and rejects a prevailing paradigm for orb web evolution. *Curr. Biol.* 24, 1765-1771.

528 Boyer, S. L., Baker, C. M., Popkin-Hall, Z. R., Laukó, D. I., Wiesner, H. A., Quay, R. H. 2015.  
529 Phylogeny and biogeography of the mite harvestmen (Arachnida : Opiliones :  
530 Cyphophthalmi) of Queensland, Australia, with a description of six new species from  
531 the rainforests of the Wet Tropics. *Invertebr. Syst.* 29, 37-70.

532 Boyer, S. L., Clouse, R. M., Benavides, L. R., Sharma, P., Schwendinger, P. J., Karunarathna, I.,  
533 Giribet, G. 2007. Biogeography of the world: a case study from cyphophthalmid  
534 Opiliones, a globally distributed group of arachnids. *J. Biogeogr.* 34, 2070-2085.

535 Bragagnolo, C., Hara, M. R., Pinto-da-Rocha, R. 2015a. A new family of Gonyleptoidea from  
536 South America (Opiliones, Laniatores). *Zool. J. Linn. Soc.* 173, 296-319.

537 Bragagnolo, C., Hara, M. R., Pinto-da-Rocha, R. 2015b. A new family of Gonyleptoidea from  
538 South America (Opiliones, Laniatores). *Zool. J. Linn. Soc.* 173, 296-319.

539 Bukontaite, R., Miller, K. B., Bergsten, J. 2014. The utility of CAD in recovering Gondwanan  
540 vicariance events and the evolutionary history of Aciliini (Coleoptera: Dytiscidae).  
541 *BMC Evol. Biol.* 14, 5.

542 Buzatto, B. A., Tomkins, J. L., Simmons, L. W., Machado, G. 2014. Correlated evolution of  
543 sexual dimorphism and male dimorphism in a clade of neotropical harvestmen.  
544 *Evolution* 68, 1671-1186.

545 Clouse, R. M., Giribet, G. 2010. When Thailand was an island – the phylogeny and  
546 biogeography of mite harvestmen (Opiliones, Cyphophthalmi, Stylocellidae) in  
547 Southeast Asia. *J. Biogeogr.* 37, 1114-1130.

548 Cruz-López, J. A., Proud, D. N., Pérez-González, A. 2016. When troglomorphism dupes  
549 taxonomists: morphology and molecules reveal the first pyramidopid harvestman  
550 (Arachnida, Opiliones, Pyramidopidae) from the New World. *Zool. J. Linn. Soc.* 177,  
551 602-620.

552 Derkarabetian, S., Hedin, M. 2014. Integrative taxonomy and species delimitation in  
553 harvestmen: a revision of the western North American genus *Sclerobunus*  
554 (Opiliones: Laniatores: Travunioidea). *PLoS One* 9, e104982.

555 Dunlop, J. A. 2007. Paleontology. In: Pinto-da-Rocha, R., Machado, G., Giribet, G. (Eds.),  
556 *Harvestmen: The Biology of Opiliones*. Harvard University Press, Cambridge, pp.  
557 247-265.

558 Dunlop, J. A., Anderson, L. I., Kerp, H., Hass, H. 2003. Preserved organs of Devonian  
559 harvestmen. *Nature* 425, 916.

560 Dunlop, J. A., Anderson, L. I., Kerp, H., Hass, H. 2004. A harvestman (Arachnida: Opiliones)  
561 from the Early Devonian Rhynie cherts, Aberdeenshire, Scotland. Trans. r. Soc.  
562 Edinburgh, Earth Sci. 94, 341-354.

563 Dunlop, J. A., Selden, P. A., Giribet, G. 2016. Penis morphology in a Burmese amber  
564 harvestman. Sci Nat-Heidelberg 103, 11.

565 Edgar, R. C. 2004. MUSCLE: multiple sequence alignment with high accuracy and high  
566 throughput. Nucleic Acids Res. 32, 1792-1797.

567 Fernández, R., Edgecombe, G. D., Giribet, G. 2016. Exploring phylogenetic relationships  
568 within Myriapoda and the effects of matrix composition and occupancy on  
569 phylogenomic reconstruction. Syst. Biol. 65, 871-889.

570 Fernández, R., Giribet, G. 2015. Unnoticed in the tropics: phylogenomic resolution of the  
571 poorly known arachnid order Ricinulei (Arachnida). Royal Society Open Science 2,  
572 150065.

573 Fernández, R., Hormiga, G., Giribet, G. 2014a. Phylogenomic analysis of spiders reveals  
574 nonmonophyly of orb weavers. Curr. Biol. 24, 1772-1777.

575 Fernández, R., Laumer, C. E., Vahtera, V., Libro, S., Kaluziak, S., Sharma, P. P., Pérez-Porro, A.  
576 R., Edgecombe, G. D., Giribet, G. 2014b. Evaluating topological conflict in centipede  
577 phylogeny using transcriptomic data sets. Mol. Biol. Evol. 31, 1500-1513.

578 Forster, R. R. 1954. The New Zealand harvestmen (Sub-order Laniatores). Canterbury Mus.  
579 Bull. 2, 1-329.

580 Garwood, R. J., Dunlop, J. A., Giribet, G., Sutton, M. D. 2011. Anatomically modern  
581 Carboniferous harvestmen demonstrate early cladogenesis and stasis in Opiliones.  
582 Nat. Commun. 2, 444.

583 Garwood, R. J., Sharma, P. P., Dunlop, J. A., Giribet, G. 2014. A new stem-group Palaeozoic  
584 harvestman revealed through integration of phylogenetics and development. Curr.  
585 Biol. 24, 1-7.

586 Giribet, G. 2015. Morphology should not be forgotten in the era of genomics—a  
587 phylogenetic perspective. Zool. Anz. 256, 96-103.

588 Giribet, G., Boyer, S. L., Baker, C., Fernández, R., Sharma, P. P., de Bivort, B. L., Daniels, S. R.,  
589 Harvey, M. S., Griswold, C. E. 2016. A molecular phylogeny of the temperate  
590 Gondwanan family Pettalidae (Arachnida, Opiliones, Cyphophthalmi) with  
591 biogeographic and taxonomic implications. Zool. J. Linn. Soc.

592 Giribet, G., Dunlop, J. A. 2005. First identifiable Mesozoic harvestman (Opiliones: Dyspnoi)  
593 from Cretaceous Burmese amber. *Proc. Biol. Sci.* 272, 1007-1013.

594 Giribet, G., Edgecombe, G. D., Wheeler, W. C., Babbitt, C. 2002. Phylogeny and systematic  
595 position of Opiliones: a combined analysis of chelicerate relationships using  
596 morphological and molecular data. *Cladistics* 18, 5-70.

597 Giribet, G., Kury, A. B. 2007. Phylogeny and Biogeography. In: Pinto-da-Rocha, R., Machado,  
598 G., Giribet, G. (Eds.), *Harvestmen: The Biology of Opiliones*. Harvard University  
599 Press, Cambridge, MA, pp. 62-87.

600 Giribet, G., Rambla, M., Carranza, S., Baguñà, J., Riutort, M., Ribera, C. 1999. Phylogeny of the  
601 arachnid order Opiliones (Arthropoda) inferred from a combined approach of  
602 complete 18S and partial 28S ribosomal DNA sequences and morphology. *Mol.*  
603 *Phylogenet. Evol.* 11, 296-307.

604 Giribet, G., Sharma, P. P. 2015. Evolutionary biology of harvestmen (Arachnida, Opiliones).  
605 *Annual Review of Entomology* 60, 157-175.

606 Giribet, G., Sharma, P. P., Benavides, L. R., Boyer, S. L., Clouse, R. M., de Bivort, B. L., Dimitrov,  
607 D., Kawauchi, G. Y., Murienne, J. Y., Schwendinger, P. J. 2012a. Evolutionary and  
608 biogeographical history of an ancient and global group of arachnids (Arachnida:  
609 Opiliones: Cyphophthalmi) with a new taxonomic arrangement. *Biol. J. Linn. Soc.*  
610 105, 92-130.

611 Giribet, G., Tourinho, A. L., Shih, C., Ren, D. 2012b. An exquisitely preserved harvestman  
612 (Arthropoda, Arachnida, Opiliones) from the Middle Jurassic of China. *Organisms,*  
613 *Diversity & Evolution* 12, 51-56.

614 Giribet, G., Vogt, L., Pérez González, A., Sharma, P., Kury, A. B. 2010. A multilocus approach to  
615 harvestman (Arachnida: Opiliones) phylogeny with emphasis on biogeography and  
616 the systematics of Laniatores. *Cladistics* 26, 408-437.

617 Groh, S., Giribet, G. 2015. Polyphyly of Caddoidea, reinstatement of the family  
618 Acropsopilionidae in Dyspnoi, and a revised classification system of Palpatores  
619 (Arachnida, Opiliones). *Cladistics* 31, 277-290.

620 Hedin, M., Derkarabetian, S., McCormack, M., Richart, C., Shultz, J. W. 2010. The phylogenetic  
621 utility of the nuclear protein-coding gene EF-1 alpha for resolving recent  
622 divergences in Opiliones, emphasizing intron evolution. *J Arachnol* 38, 9-20.



623 Hedin, M., Starrett, J., Akhter, S., Schönhöfer, A. L., Shultz, J. W. 2012a. Phylogenomic  
624 resolution of Paleozoic divergences in harvestmen (Arachnida, Opiliones) via  
625 analysis of next- generation transcriptome data. PLoS One 7, e428888.

626 Hedin, M., Tsurusaki, N., Macías-Ordóñez, R., Shultz, J. W. 2012b. Molecular systematics of  
627 sclerosomatid harvestmen (Opiliones, Phalangioidea, Sclerosomatidae): Geography  
628 is better than taxonomy in predicting phylogeny. Mol. Phylogenet. Evol. 62, 224-236.

629 Hejnal, A., Obst, M., Stamatakis, A., M., O., Rouse, G. W., Edgecombe, G. D., Martinez, P.,  
630 Baguñà, J., Bailly, X., Jondelius, U., Wiens, M., Müller, W. E. G., Seaver, E., Wheeler, W.  
631 C., Martindale, M. Q., Giribet, G., Dunn, C. W. 2009. Assessing the root of bilaterian  
632 animals with scalable phylogenomic methods. Proc. R. Soc. B Biol. Sci. 276, 4261-  
633 4270.

634 Huang, D., Selden, P. A., Dunlop, J. A. 2009. Harvestmen (Arachnida: Opiliones) from the  
635 Middle Jurassic of China. Naturwissenschaften 96, 955-962.

636 Hunt, G. S., Cokendolpher, J. C. 1991. Ballarrinae, a new subfamily of harvestmen from the  
637 southern hemisphere (Arachnida, Opiliones, Neopilionidae). Rec Aust Mus 43, 131-  
638 169.

639 Kück, P., Struck, T. H. 2014. BaCoCa – A heuristic software tool for the parallel assessment of  
640 sequence biases in hundreds of gene and taxon partitions. Mol. Phylogenet. Evol. 70,  
641 94-98.

642 Kury, A. B. 1993. Análise filogenética de Gonyleptoidea (Arachnida, Opiliones, Laniatores).  
643 Universidade de São Paulo, São Paulo, pp. 1-73.

644 Kury, A. B. 2013. Order Opiliones Sundevall, 1833. Zootaxa 3703, 27-33.

645 Kury, A. B. 2014. Why does the Tricommatinae position bounce so much within Laniatores?  
646 A cladistic analysis, with description of a new family of Gonyleptoidea (Opiliones,  
647 Laniatores). Zool. J. Linn. Soc. 172, 1-48.

648 Kury, A. B. 2015. Opiliones are no longer the same-on suprafamilial groups in harvestmen  
649 (Arthropoda: Arachnida). Zootaxa 3925, 301-340.

650 Kury, A. B., Villarreal M, O. 2015. The prickly blade mapped: establishing homologies and a  
651 chaetotaxy for macrosetae of penis ventral plate in Gonyleptoidea (Arachnida,  
652 Opiliones, Laniatores). Zool. J. Linn. Soc. 174, 1-46.

653 Lartillot, N., Philippe, H. 2004. A Bayesian mixture model for across-site heterogeneities in  
654 the amino-acid replacement process. Mol. Biol. Evol. 21, 1095-1109.

655 Lartillot, N., Rodrigue, N., Stubbs, D., Richer, J. 2013. PhyloBayes MPI: Phylogenetic  
656 reconstruction with infinite mixtures of profiles in a parallel environment. *Syst. Biol.*  
657 62, 611-615.

658 Machado, G. 2007. Maternal or paternal egg guarding? Revisiting parental care in  
659 triaenonychid harvestmen (Opiliones). *J. Arachnol.* 35, 202-204.

660 Machado, G., Macías-Ordóñez, R. 2007. Reproduction. In: Pinto-da-Rocha, R., Machado, G.,  
661 Giribet, G. (Eds.), *Harvestmen: The Biology of Opiliones*. Harvard University Press,  
662 Cambridge, pp. 414-454.

663 Martens, J. 1976. Genitalmorphologie, System und Phylogenie der Weberknechte  
664 (Arachnida, Opiliones). *Entomologica Germanica, Zeitschrift für das Gesamtgebiet*  
665 *der wissenschaftlichen Entomologie* 3, 51-68.

666 Martens, J. 1980. Versuch eines Phylogenetischen Systems der Opiliones. *Proceedings 8th*  
667 *International Congress of Arachnology*. Verlag H. Egerman, Vienna, pp. 355-360.

668 Martens, J., Hoheisel, U., Götze, M. 1981. Vergleichende Anatomie der Legeröhren der  
669 Opiliones als Beitrag zur Phylogenie der Ordnung (Arachnida). *Zoologische*  
670 *Jahrbücher, Abteilung für Anatomie und Ontogenie der Tiere* 105, 13-76.

671 Misof, B., Liu, S., Meusemann, K., Peters, R. S., Donath, A., Mayer, C., Frandsen, P. B., Ware, J.,  
672 Flouri, T., Beutel, R. G., Niehuis, O., Petersen, M., Izquierdo-Carrasco, F., Wappler, T.,  
673 Rust, J., Aberer, A. J., Aspöck, U., Aspöck, H., Bartel, D., Blanke, A., Berger, S., Böhm, A.,  
674 Buckley, T. R., Calcott, B., Chen, J., Friedrich, F., Fukui, M., Fujita, M., Greve, C., Grobe,  
675 P., Gu, S., Huang, Y., Jermiin, L. S., Kawahara, A. Y., Krogmann, L., Kubiak, M., Lanfear,  
676 R., Letsch, H., Li, Y., Li, Z., Li, J., Lu, H., Machida, R., Mashimo, Y., Kapli, P., McKenna, D.,  
677 Meng, G., Nakagaki, Y., Navarrete-Heredia, J. L., Ott, M., Ou, Y., Pass, G.,  
678 Podsiadlowski, L., Pohl, H., von Reumont, B. M., Schütte, K., Sekiya, K., Shimizu, S.,  
679 Slipinski, A., Stamatakis, A., Song, W., Su, X., Szucsich, N. U., Tan, M., Tan, X., Tang, M.,  
680 Tang, J., Timelthaler, G., Tomizuka, S., Trautwein, M., Tong, X., Uchifune, T., Walz, M.,  
681 G., Wiegmann, B. M., Wilbrandt, J., Wipfler, B., Wong, T. K. F., Wu, Q., Wu, G., Xie, Y.,  
682 Yang, S., Yang, Q., Yeates, D. K., Yoshizawa, K., Zhang, Q., Zhang, R., Zhang, W., Zhang,  
683 Y., Zhao, J., Zhou, C., Zhou, L., Ziesmann, T., Zou, S., Li, Y., Xu, X., Zhang, Y., Yang, H.,  
684 Wang, J., Wang, J., Kjer, K. M., et al. 2014. Phylogenomics resolves the timing and  
685 pattern of insect evolution. *Science* 346, 763-767.

686 Murienne, J., Daniels, S. R., Buckley, T. R., Mayer, G., Giribet, G. 2014. A living fossil tale of  
687 Pangaeon biogeography. *Proc. R. Soc. B Biol. Sci.* 281, 20132648.

688 Pinto-da-Rocha, R., Bragagnolo, C., Marques, F. P. L., Antunes Junior, M. 2014. Phylogeny of  
689 harvestmen family Gonyleptidae inferred from a multilocus approach (Arachnida:  
690 Opiliones). Cladistics 30, 519-539.

691 Poinar, G. 2008. *Palaeosiro burmanicum* n. gen., n. sp., a fossil Cyphophthalmi (Arachnida:  
692 Opiliones: Sironidae) in Early Cretaceous Burmese amber. In: Makarov, S. E.,  
693 Dimitrijevic, R. N. (Eds.), Advances in Arachnology and Developmental Biology.  
694 Papers dedicated to Prof. Dr. Bozidar Curcic. Faculty of Life Sciences, University of  
695 Vienna, and Serbian Academy of Sciences and Arts, Vienna, Belgrade, Sofia, pp. 267-  
696 274.

697 Requena, G. S., Buzatto, B. A., Martins, E. G., Machado, G. 2012. Paternal care decreases  
698 foraging activity and body condition, but does not impose survival costs to caring  
699 males in a Neotropical arachnid. PLoS One 7, e46701.

700 Richart, C. H., Hayashi, C. Y., Hedin, M. 2016. Phylogenomic analyses resolve an ancient  
701 trichotomy at the base of Ischyropsalidoidea (Arachnida, Opiliones) despite high  
702 levels of gene tree conflict and unequal minority resolution frequencies. Mol.  
703 Phylogenet. Evol. 95, 171-182.

704 Richart, C. H., Hedin, M. 2013. Three new species in the harvestmen genus *Acuclavella*  
705 (Opiliones, Dyspnoi, Ischyropsalidoidea), including description of male *Acuclavella*  
706 *quattuor* Shear, 1986. ZooKeys, 19-68.

707 San Mauro, D., Vences, M., Alcobendas, M., Zardoya, R., Meyer, A. 2005. Initial diversification  
708 of living amphibians predated the breakup of Pangaea. Am Nat 165, 590-599.

709 Schönhofer, A. L. 2013. A taxonomic catalogue of the Dyspnoi Hansen and Sørensen, 1904  
710 (Arachnida: Opiliones). Zootaxa 3679, 1-68.

711 Schönhofer, A. L., McCormack, M., Tsurusaki, N., Martens, J., Hedin, M. 2013. Molecular  
712 phylogeny of the harvestmen genus *Sabacon* (Arachnida: Opiliones: Dyspnoi)  
713 reveals multiple Eocene-Oligocene intercontinental dispersal events in the Holarctic.  
714 Mol. Phylogenet. Evol. 66, 303-315.

715 Schönhofer, A. L., Vernesi, C., Martens, J., Hedin, M. 2015. Molecular phylogeny,  
716 biogeographic history, and evolution of cave-dwelling taxa in the European  
717 harvestman genus *Ischyropsalis* (Opiliones: Dyspnoi). J Arachnol 43, 40-53.

718 Selden, P. A., Dunlop, J. A., Giribet, G., Zhang, W., Ren, D. 2016. The oldest armoured  
719 harvestman (Arachnida: Opiliones: Laniatores), from Upper Cretaceous Myanmar  
720 amber. Cretaceous Res. 65, 206-212.

721 Sharma, P., Giribet, G. 2009. Sandokanid phylogeny based on eight molecular markers—the  
722 evolution of a southeast Asian endemic family of Laniatores (Arachnida, Opiliones).  
723 Mol. Phylogenet. Evol. 52, 432-447.

724 Sharma, P. P., Fernández, R., Esposito, L. A., González-Santillán, E., Monod, L. 2015.  
725 Phylogenomic resolution of scorpions reveals multilevel discordance with  
726 morphological phylogenetic signal. Proc. R. Soc. B Biol. Sci. 282, 20142953.

727 Sharma, P. P., Giribet, G. 2011. The evolutionary and biogeographic history of the armoured  
728 harvestmen – Laniatores phylogeny based on ten molecular markers, with the  
729 description of two new families of Opiliones (Arachnida). Invertebr. Syst. 25, 106-  
730 142.

731 Sharma, P. P., Giribet, G. 2012. Out of the Neotropics: Late Cretaceous colonization of  
732 Australasia by American arthropods. Proc. R. Soc. B Biol. Sci. 279, 3501-3509.

733 Sharma, P. P., Giribet, G. 2014. A revised dated phylogeny of the arachnid order Opiliones.  
734 Front. Genet. 5, 255.

735 Sharma, P. P., Kaluziak, S., Pérez-Porro, A. R., González, V. L., Hormiga, G., Wheeler, W. C.,  
736 Giribet, G. 2014. Phylogenomic interrogation of Arachnida reveals systemic conflicts  
737 in phylogenetic signal. Mol. Biol. Evol. 31, 2963-2984.

738 Sharma, P. P., Prieto, C. E., Giribet, G. 2011. A new family of Laniatores (Arachnida :  
739 Opiliones) from the Afrotropics. Invertebr. Syst. 25, 143-154.

740 Sharma, P. P., Santiago, M. A., Kriebel, R., Lipps, S. M., Buenavente, P. A., Diesmos, A. C., Janda,  
741 M., Boyer, S. L., Clouse, R. M., Wheeler, W. C. 2016. A multilocus phylogeny of  
742 Podoctidae (Arachnida, Opiliones, Laniatores) and parametric shape analysis reveal  
743 the disutility of subfamilial nomenclature in armored harvestman systematics. Mol.  
744 Phylogenet. Evol.

745 Shear, W. A. 1980. A review of the Cyphophthalmi of the United States and Mexico, with a  
746 proposed reclassification of the suborder (Arachnida, Opiliones). Am. Mus. Novit.  
747 2705, 1-34.

748 Shear, W. A. 1986. A cladistic analysis of the opilionid superfamily Ischyropsalidoidea, with  
749 descriptions of the new family Ceratolasmatidae, the new genus *Acuclavella*, and  
750 four new species. Am. Mus. Novit. 2844, 1-29.

751 Shear, W. A. 2010. New species and records of ortholasmatine harvestmen from México,  
752 Honduras, and the western United States (Opiliones, Nemastomatidae,  
753 Ortholasmatinae). ZooKeys 52, 9-45.

754 Shear, W. A., Gruber, J. 1983. The opilionid subfamily Ortholasmatinae (Opiliones,  
755 Troguloidea, Nemastomatidae). *Am. Mus. Novit.* 2757, 1-65.

756 Shultz, J. W. 1998. Phylogeny of Opiliones (Arachnida): an assessment of the  
757 "Cyphopalpatores" concept. *J. Arachnol.* 26, 257-272.

758 Shultz, J. W., Regier, J. C. 2001. Phylogenetic analysis of Phalangida (Arachnida, Opiliones)  
759 using two nuclear protein-encoding genes supports monophyly of Palpatores. *J.*  
760 *Arachnol.* 29, 189-200.

761 Stamatakis, A., Hoover, P., Rougemont, J. 2008. A rapid bootstrap algorithm for the RAXML  
762 Web servers. *Syst. Biol.* 57, 758-771.

763 Vélez, S., Fernández, R., Giribet, G. 2014. A molecular phylogenetic approach to the New  
764 Zealand species of Enantiobuninae (Opiliones : Eupnoi : Neopilionidae). *Invertebr.*  
765 *Syst.* 28, 565-589.

766 Wu, M., Chatterji, S., Eisen, J. A. 2012. Accounting for alignment uncertainty in  
767 phylogenomics. *PLoS One* 7, e30288.

768 Yang, Z. H., Rannala, B. 2006. Bayesian estimation of species divergence times under a  
769 molecular clock using multiple fossil calibrations with soft bounds. *Mol. Biol. Evol.*  
770 23, 212-226.

771 Zoller, S., Schneider, A. 2013. Improving phylogenetic inference with a semiempirical amino  
772 acid substitution model. *Mol. Biol. Evol.* 30, 469-479.

773

774

# Figure captions:

**Figure 1.** Live habitus of selected specimens: a. *Aoraki longitarsa* from Aoraki/Mount Cook NP, South Island, New Zealand, 20.i.2014 (MCZ 137238); b. *Parasiro coiffaiti* from Queralbs, Barcelona, Catalonia, Spain, 15.vii.2014 (MCZ 43732); c. *Caddo pepperella* from Petersham, Massachusetts, USA, 24.vi.2014 (MCZ 40441); d. *Forsteropsalis pureora* from Waikeremoana, North Island, New Zealand, 12.i.2014; e. *Odiellus troguloides* from Queralbs, Barcelona, Catalonia, Spain, 15.vii.2014 (MCZ 43657); f. *Homalenotus remyi* from Queralbs, Barcelona, Catalonia, Spain, 15.vii.2014 (MCZ 43715); g. *Acropsopilio neozealandiae* from Putai Ngahere Reserve, North Island, New Zealand, 14.i.2016 (MCZ 30457); h. *Ischyropsalis nodifera* from Sodupe, Bilbo, Euskadi, Spain, photographed 13.viii.2014 (MCZ 45501); i. *Nemastomella dubia* from Queralbs, Barcelona, Catalonia, Spain, 15.vii.2014 (MCZ 43619)

**Figure 2.** Live habitus of selected specimens: a. *Synthetonychia glacialis* from Westland/Tai Poutini NP, South Island, New Zealand, 19.i.2014 (MCZ 137212); b. *Fumontana deprehendor* from Great Smoky Mountains NP, Tennessee, USA, 1.ix.2014 (MCZ 46881); c. *Gnomulus latoperculum* from Gunung Ambang, Sulawesi, Indonesia, 19.vi.2006 (MCZ 131263); d. *Idzubius akiyamae* from Izu Peninsula, Honshu, Japan, 3.xii.2014 (MCZ 49771); e. *Fissiphallius martensi* from Reserva Ducke, Amazonas, Brazil, 17.xii.2013 (MCZ 136546); f. *Pellobunus* sp. from Isla Colón, Bocas del Toro, Panama, 22.iii.2014 (MCZ 31593); g. *Avima matintaperera* from Reserva Ducke, Amazonas, Brazil, 18.xii.2013 (MCZ 136560); h. *Saramacia lucasae* from Reserva Ducke, Amazonas, Brazil, 15.xii.2013 (MCZ 136518); i. *Protimesius longipalpis* from Reserva Ducke, Amazonas, Brazil, 15.xii.2013; j. *Phareicranaus manauara* from Reserva Ducke, Amazonas, Brazil, 17.xii.2013; k. *Escadabius* sp. nov. from Reserva Ducke, Amazonas, Brazil, 16.xii.2013; l. *Pseudopachylus longipes* from Serra de Paranapaciaba, São Paulo, Brazil, 3.vi.2014 (MCZ 32167).

**Figure 3.** Phylogenetic hypothesis based on the 78-gene matrix I analyzed in PhyML\_PCMA (-lnL = -248960.37) Selected deep nodes (gray circle) show Navajo rug illustrating support under specific data matrices and analyses. In Grassatores, colored text for family names indicate superfamily boundaries.

**Figure 4.** Same topology as shown in Figure 2 showcasing support for shallower nodes.

**Figure 5.** Up, chronogram of Opiliones evolution for the 78-gene data set with 95% highest posterior density (HPD) values for the dating for the first calibration configuration (i.e., the age of *Eophalangium* as the minimum age of Cyphophthalmi) under uncorrelated gamma model. Down, palaeogeographical reconstruction according to Christopher R. Scotese (maps modified from <http://www.scotese.com/earth.htm>) at some of the key ages of the split of Opiliones main lineages, as recovered by the molecular dating analysis. Vertical bars indicate correspondence with each paleomap following a color code.

**Figure 6.** Summary tree of familial and superfamilial relationships of Opiliones supported in this study, with major nodes highlighted.

## Supporting Information

**Figure S1.** BaCoCa results showing compositional homogeneity values per taxon and per gene in supermatrices I (page 1), IV (page 2), V (page 3), VI (page 4) and II (page %)(results in supermatrix III not shown due to a lack of resolution related to the high number of genes included in the matrix).

**Figure S2.** Chronogram of Opiliones evolution for the 78-gene data set with 95% highest posterior density (HPD) values for a) the dating for the first calibration configuration (i.e., the age of *Eophalangium* as the minimum age of Cyphophthalmi) under the autocorrelated (page 1) and uncorrelated gamma model (page 2), and b) the second calibration configuration (i.e., the age of *Eophalangium* as the floor of Opiliones) under the autocorrelated (page3) and uncorrelated gamma model (page 4).



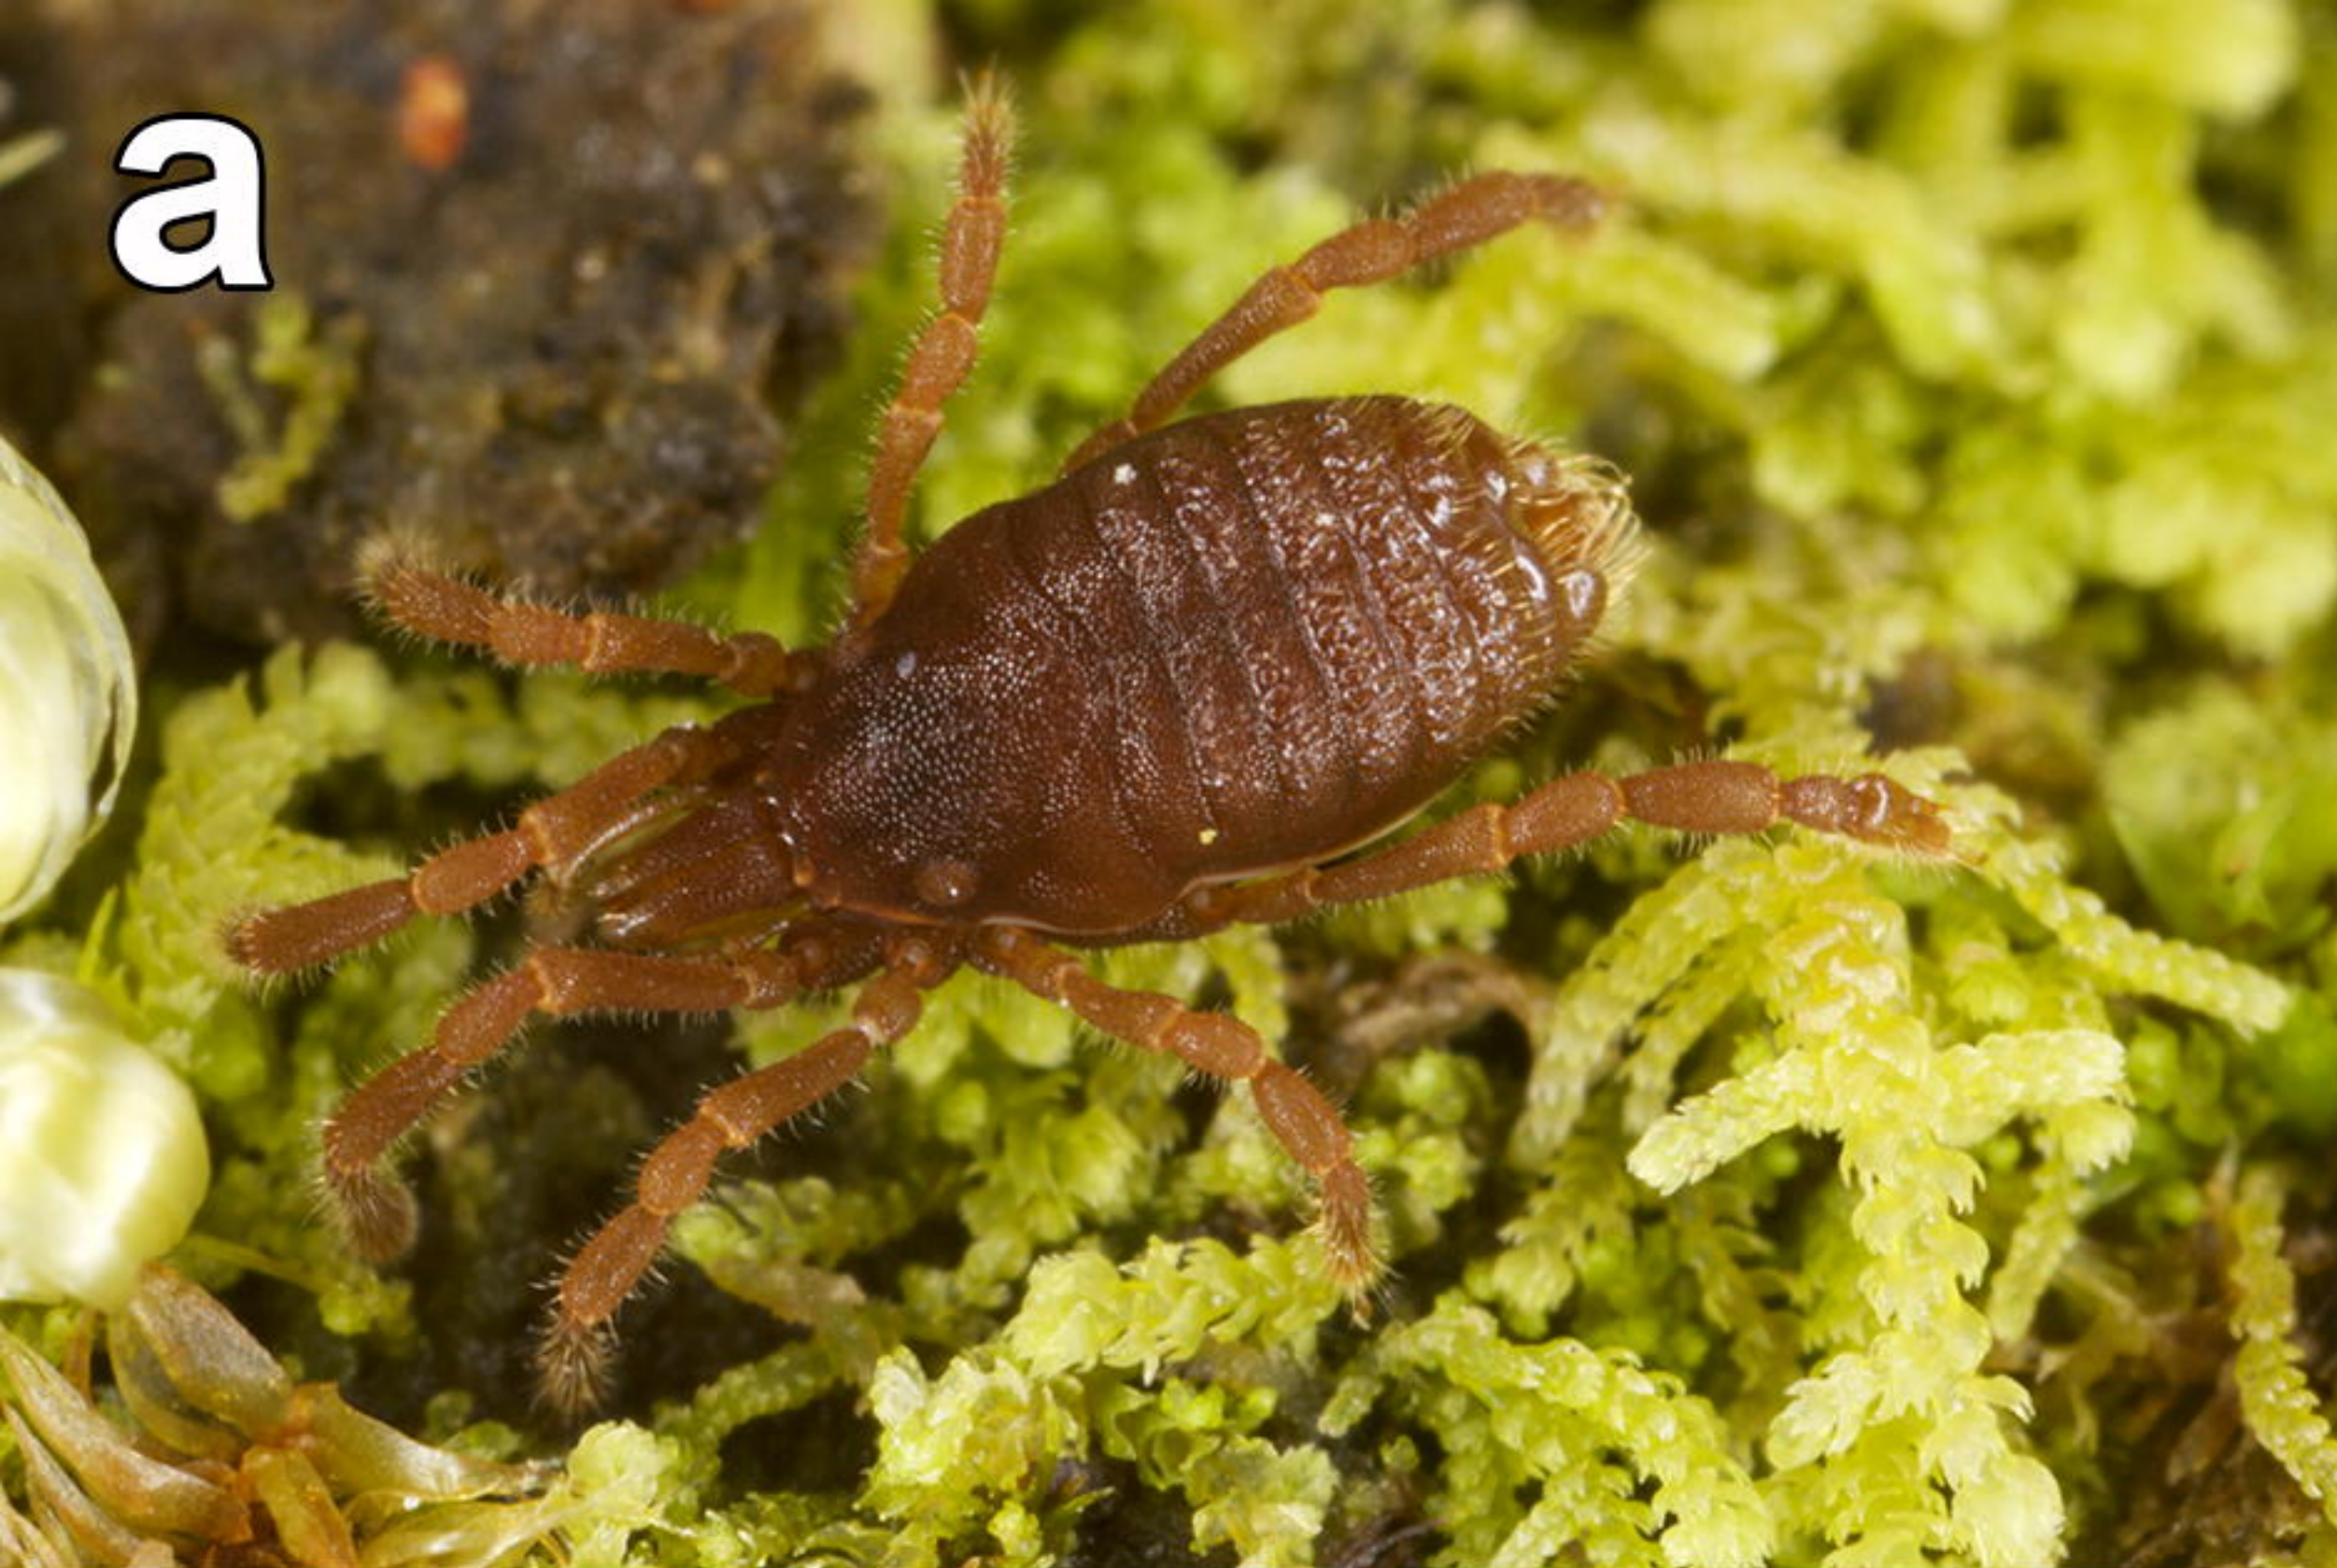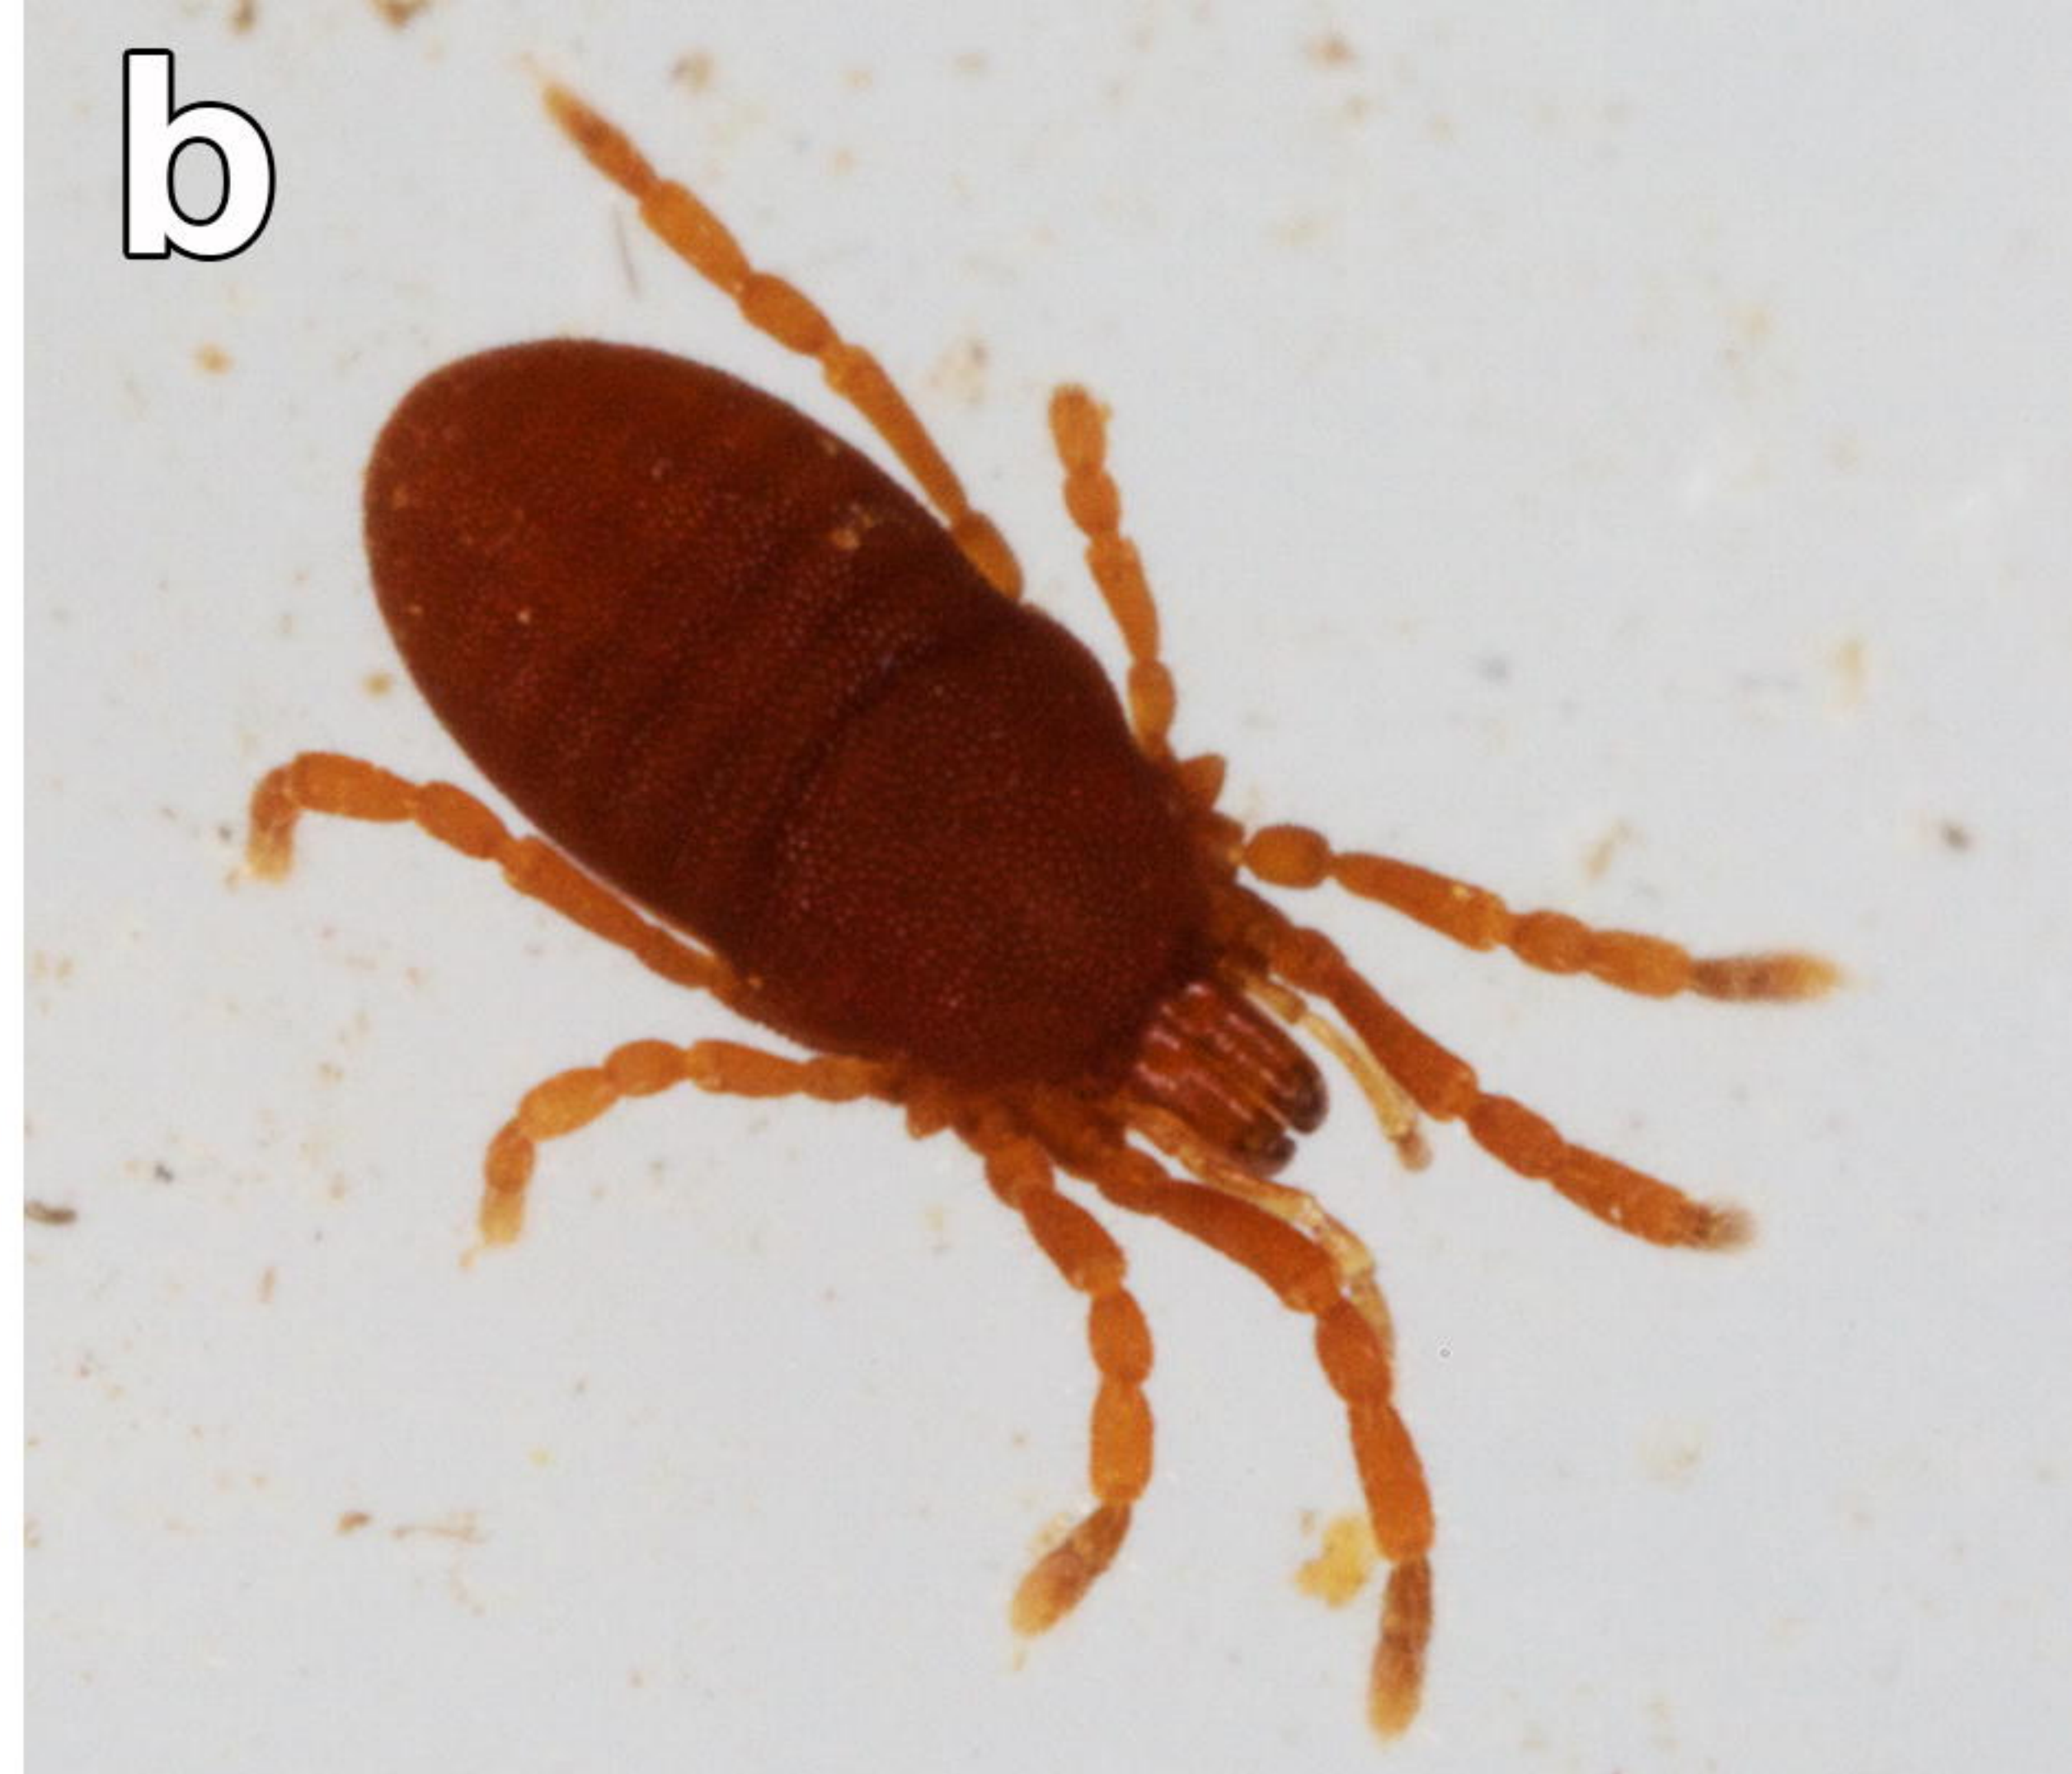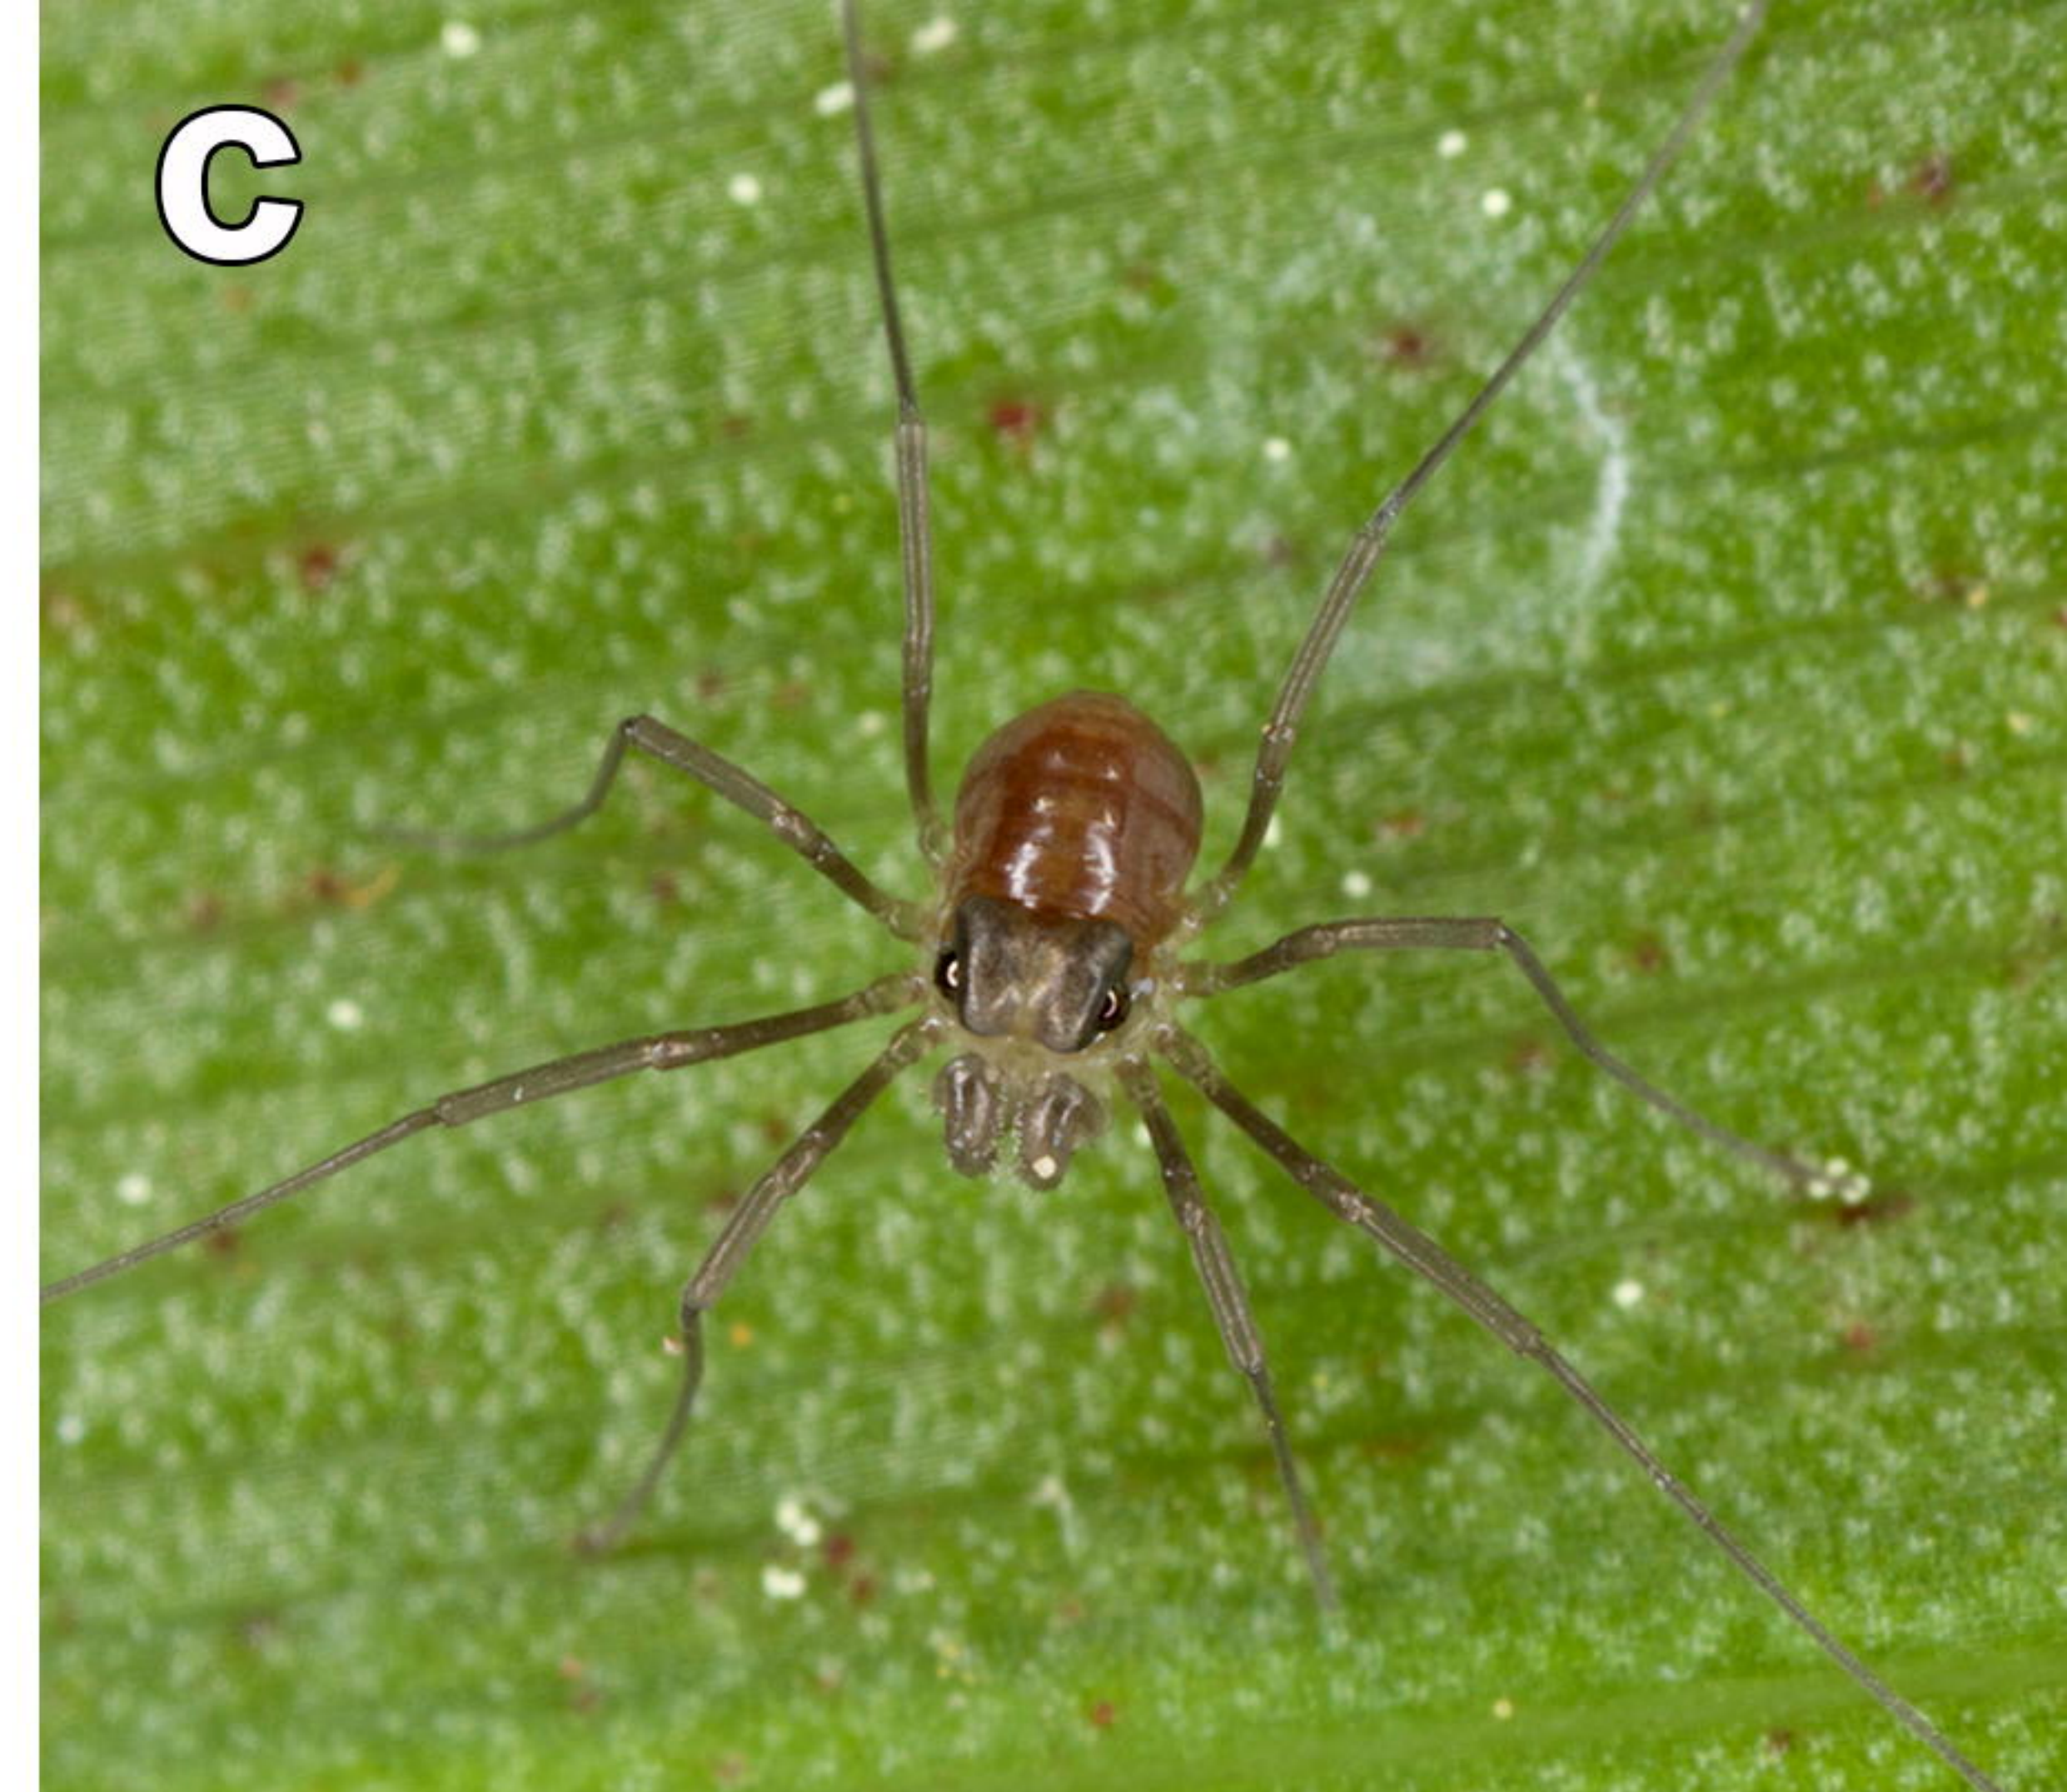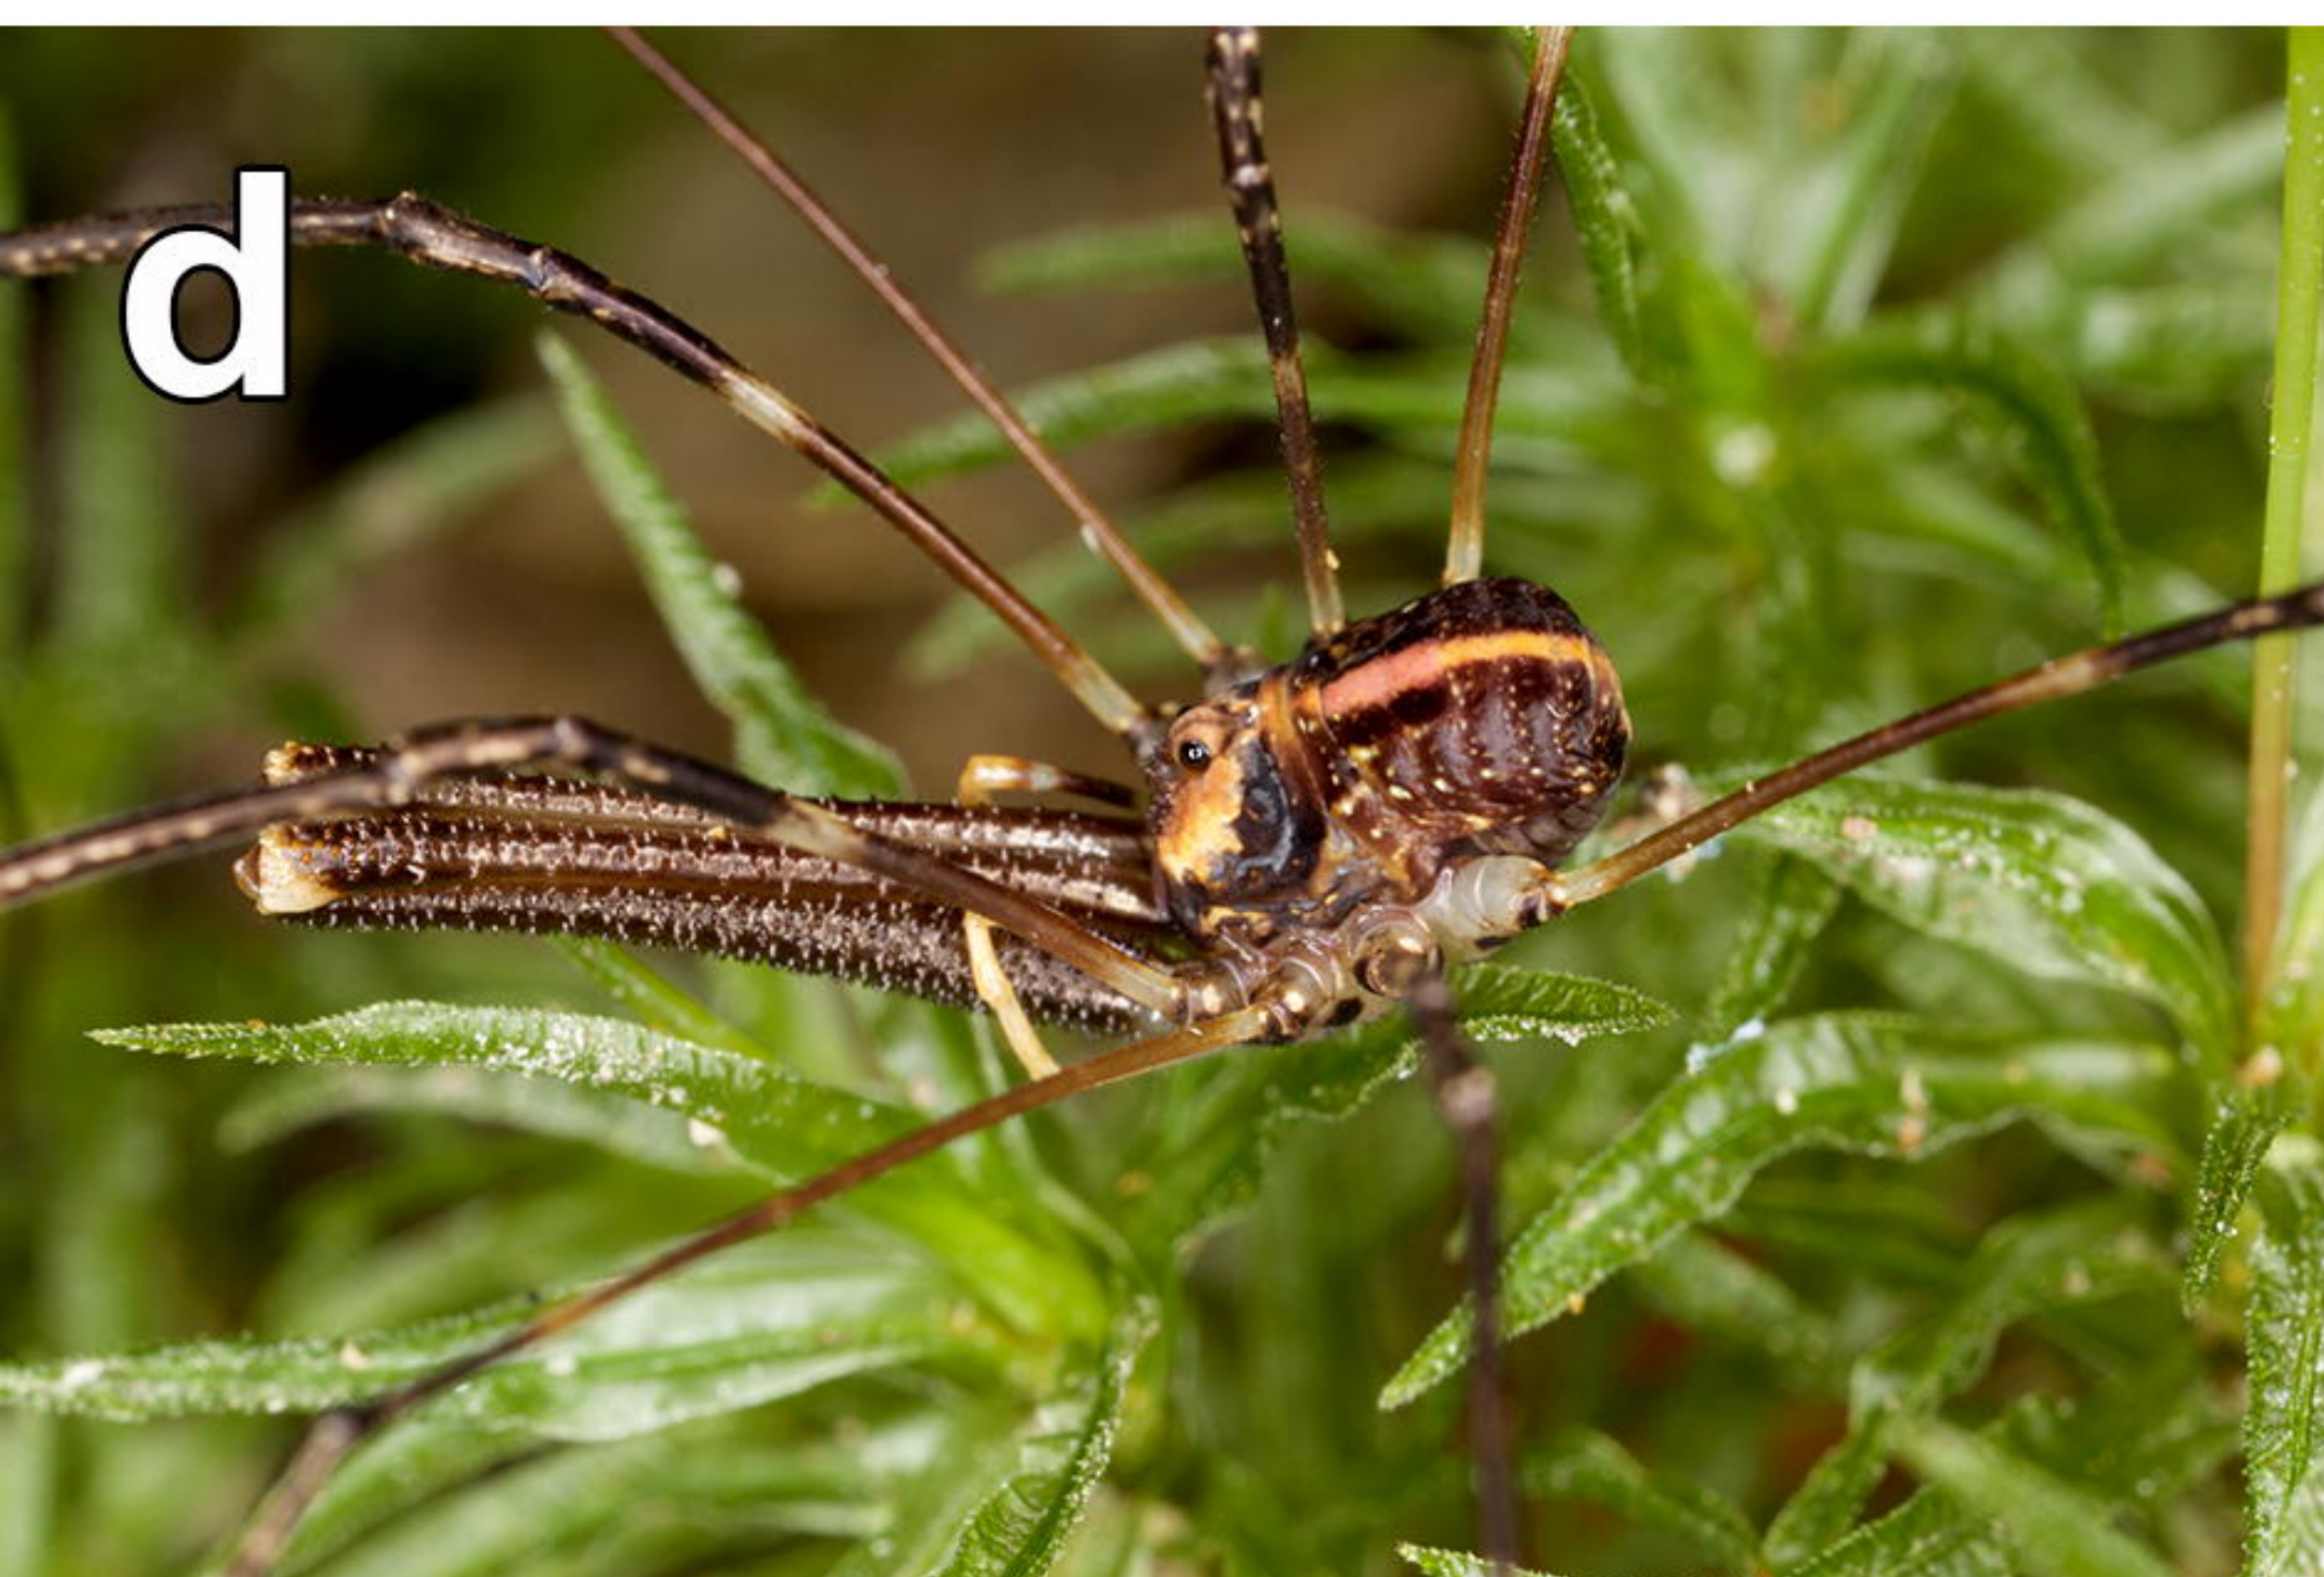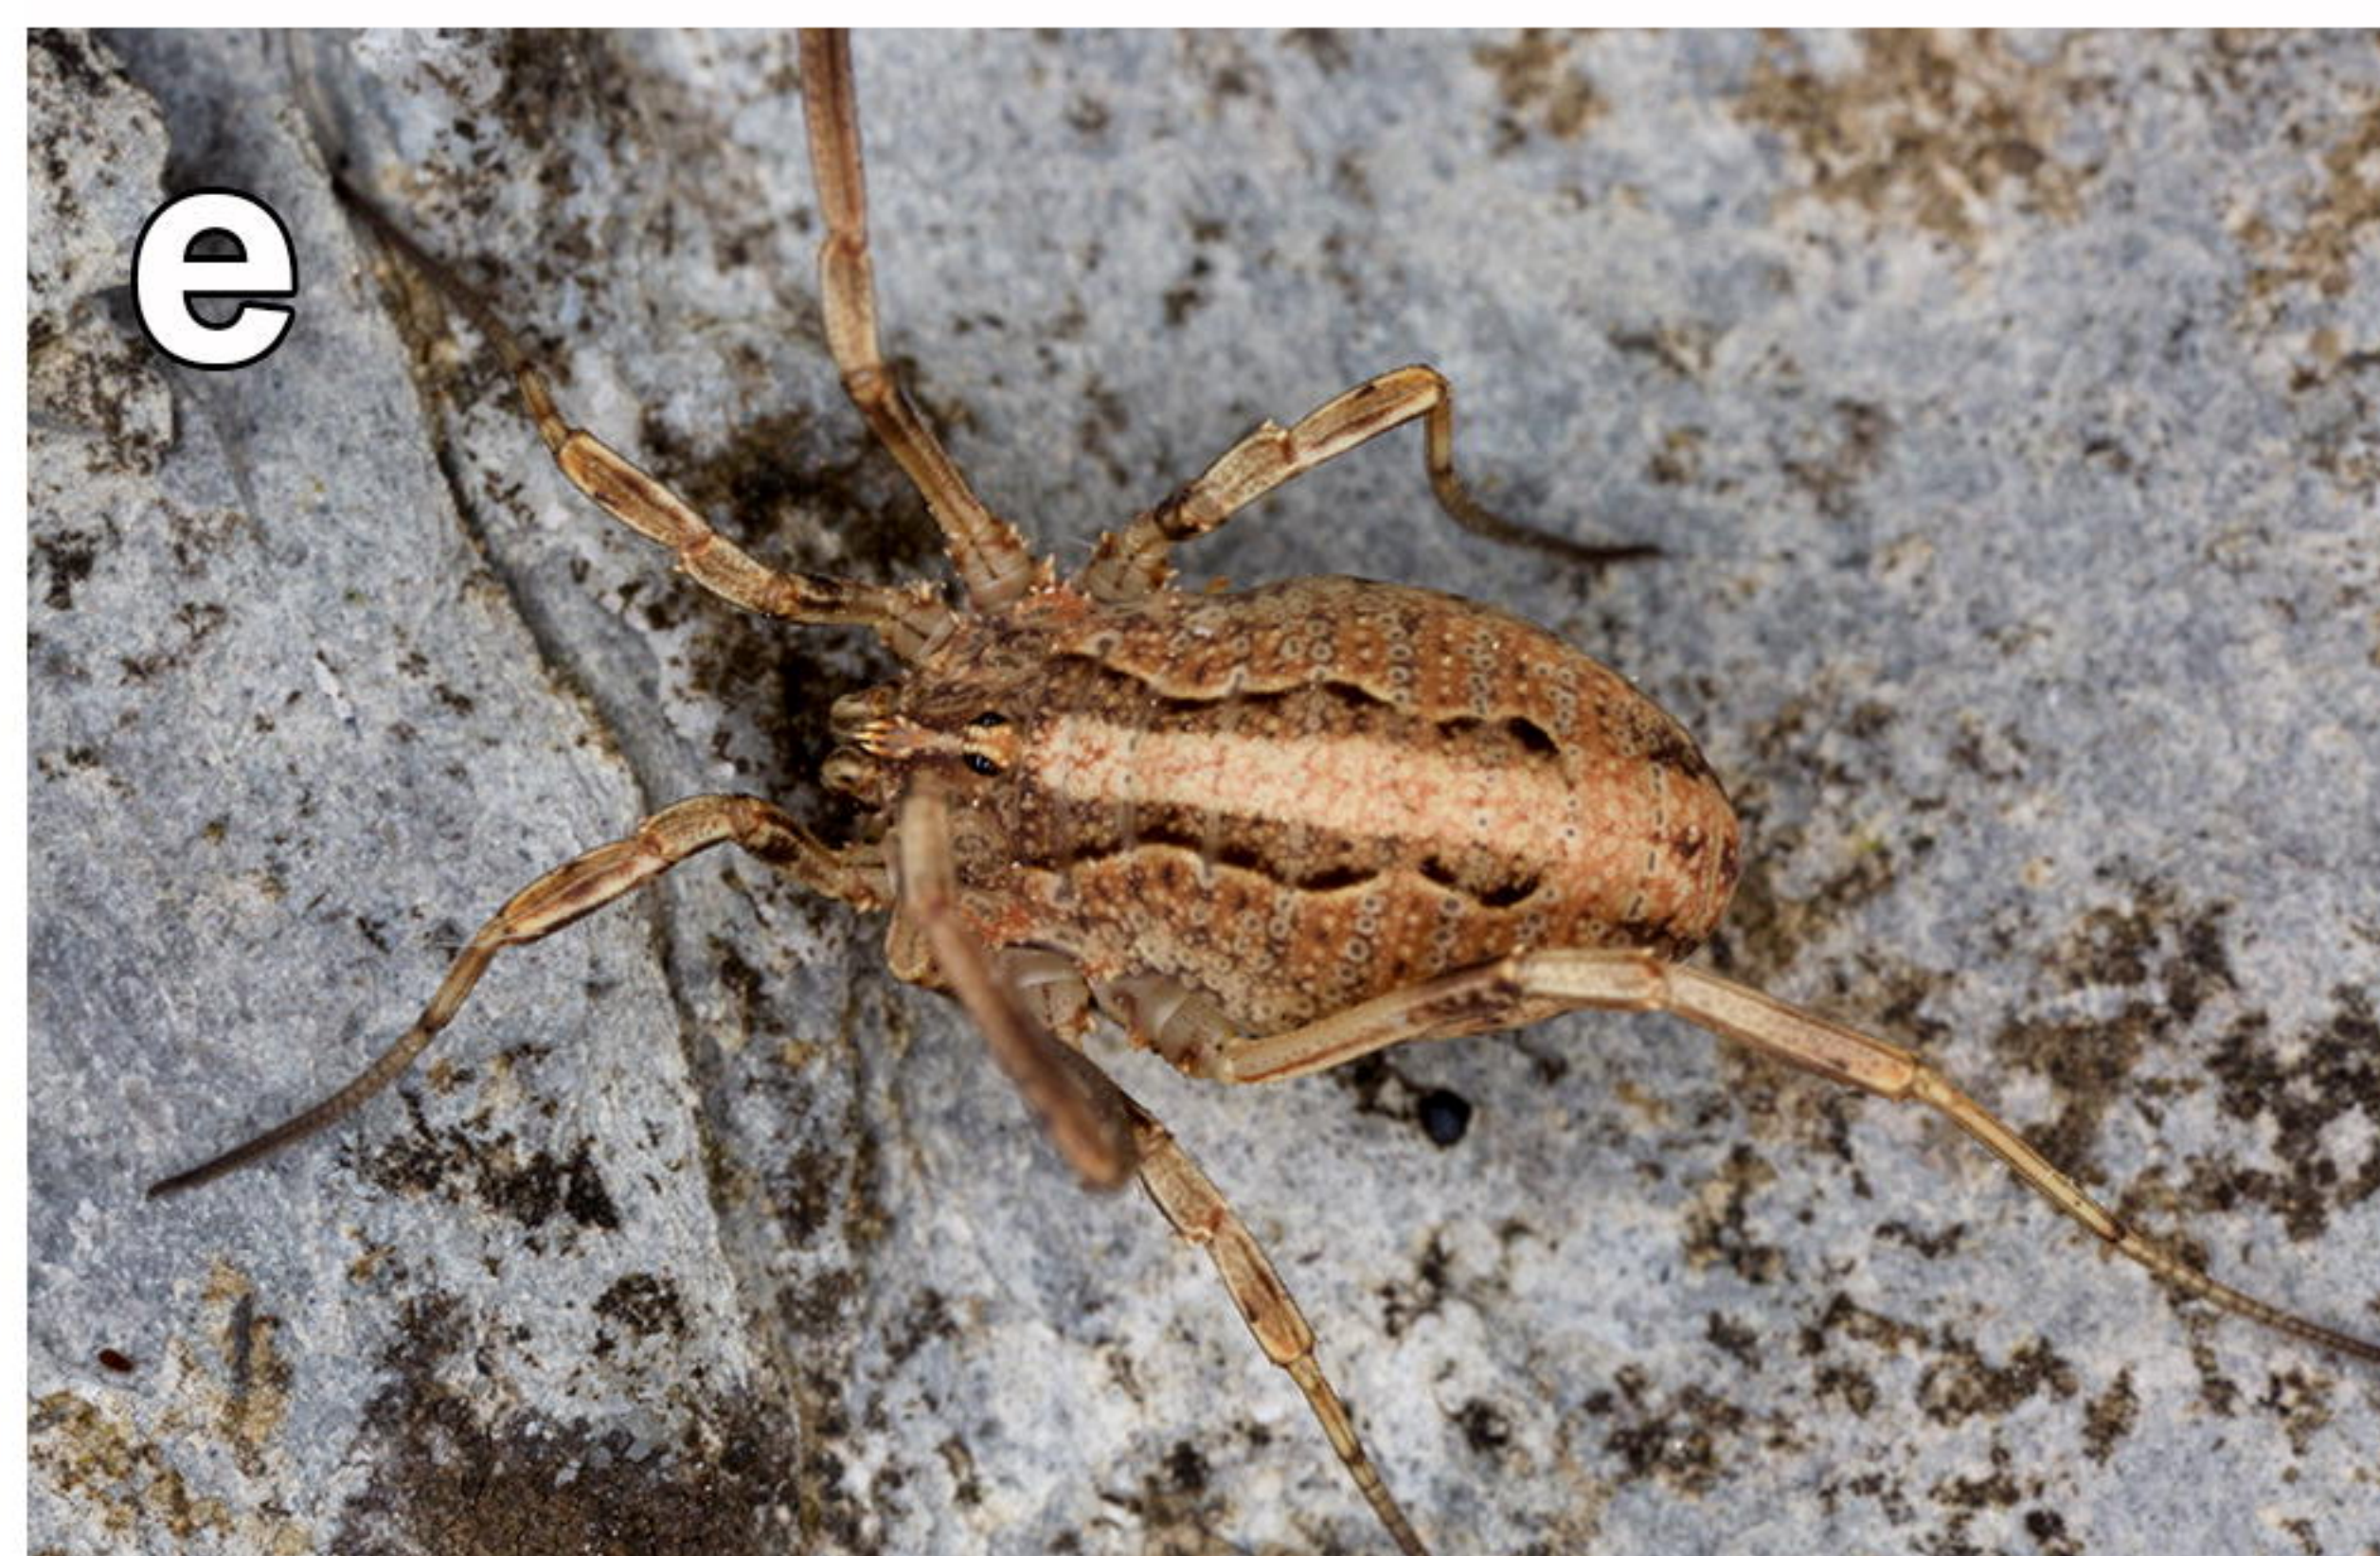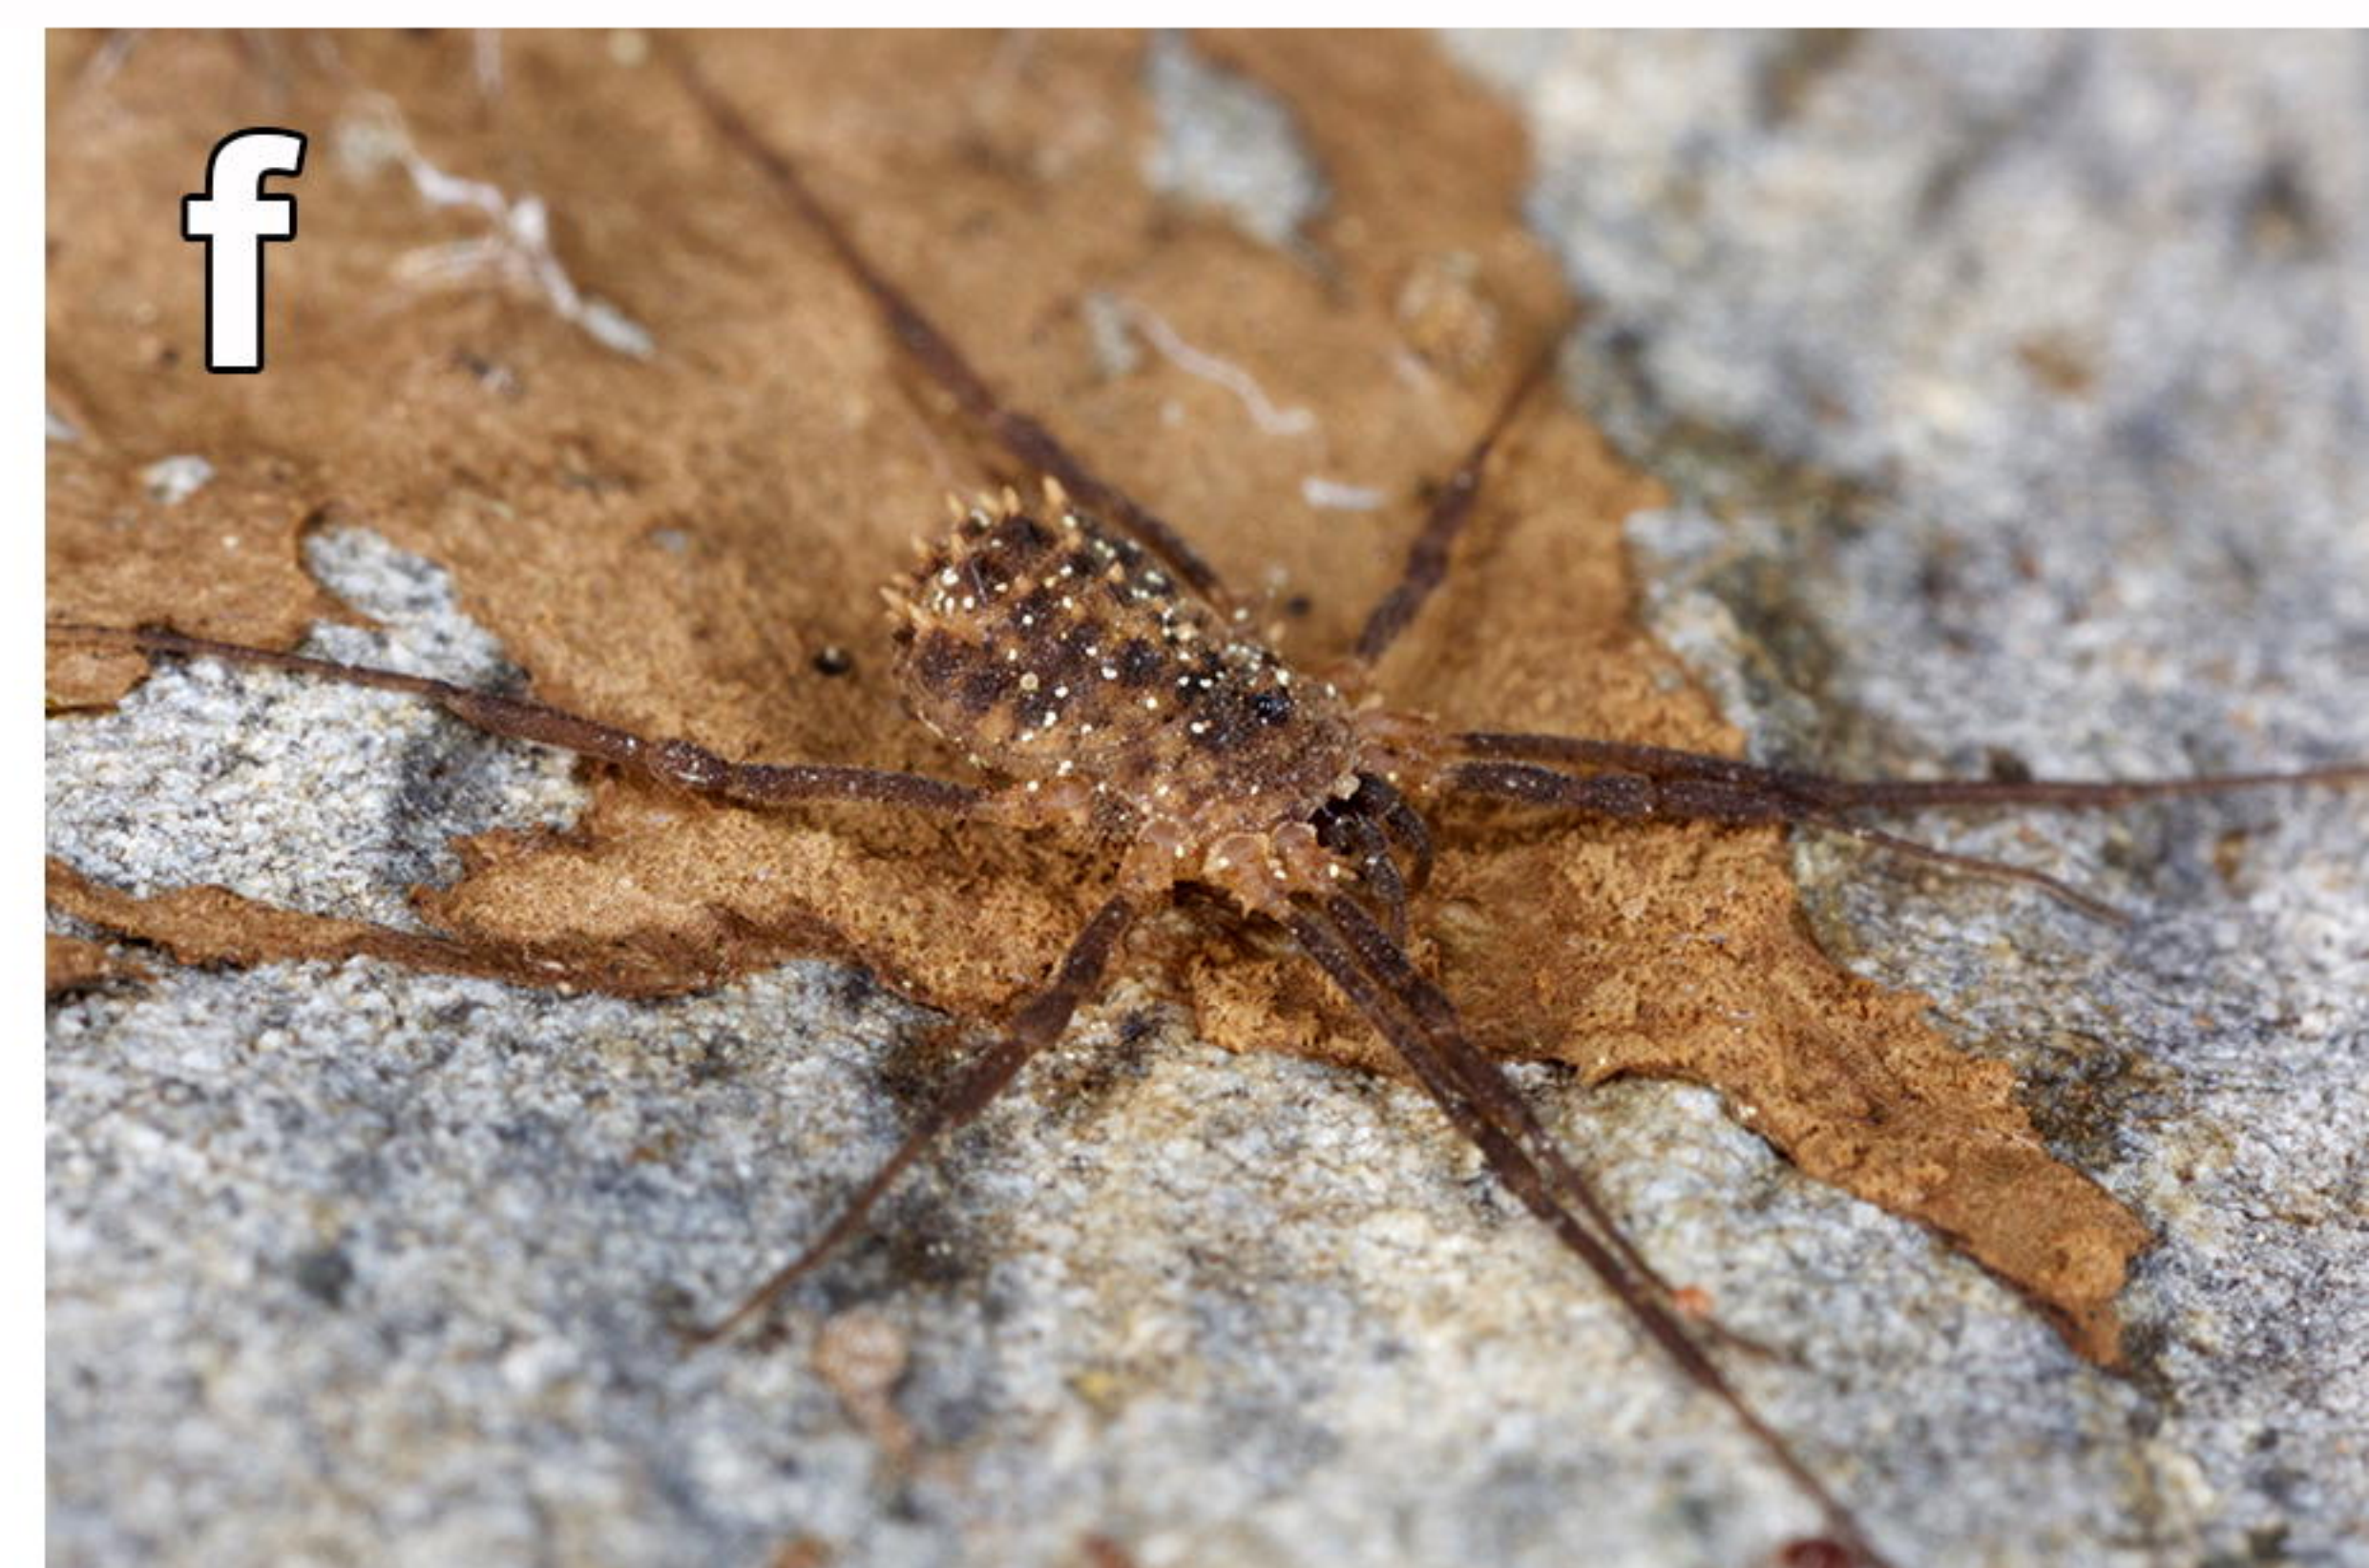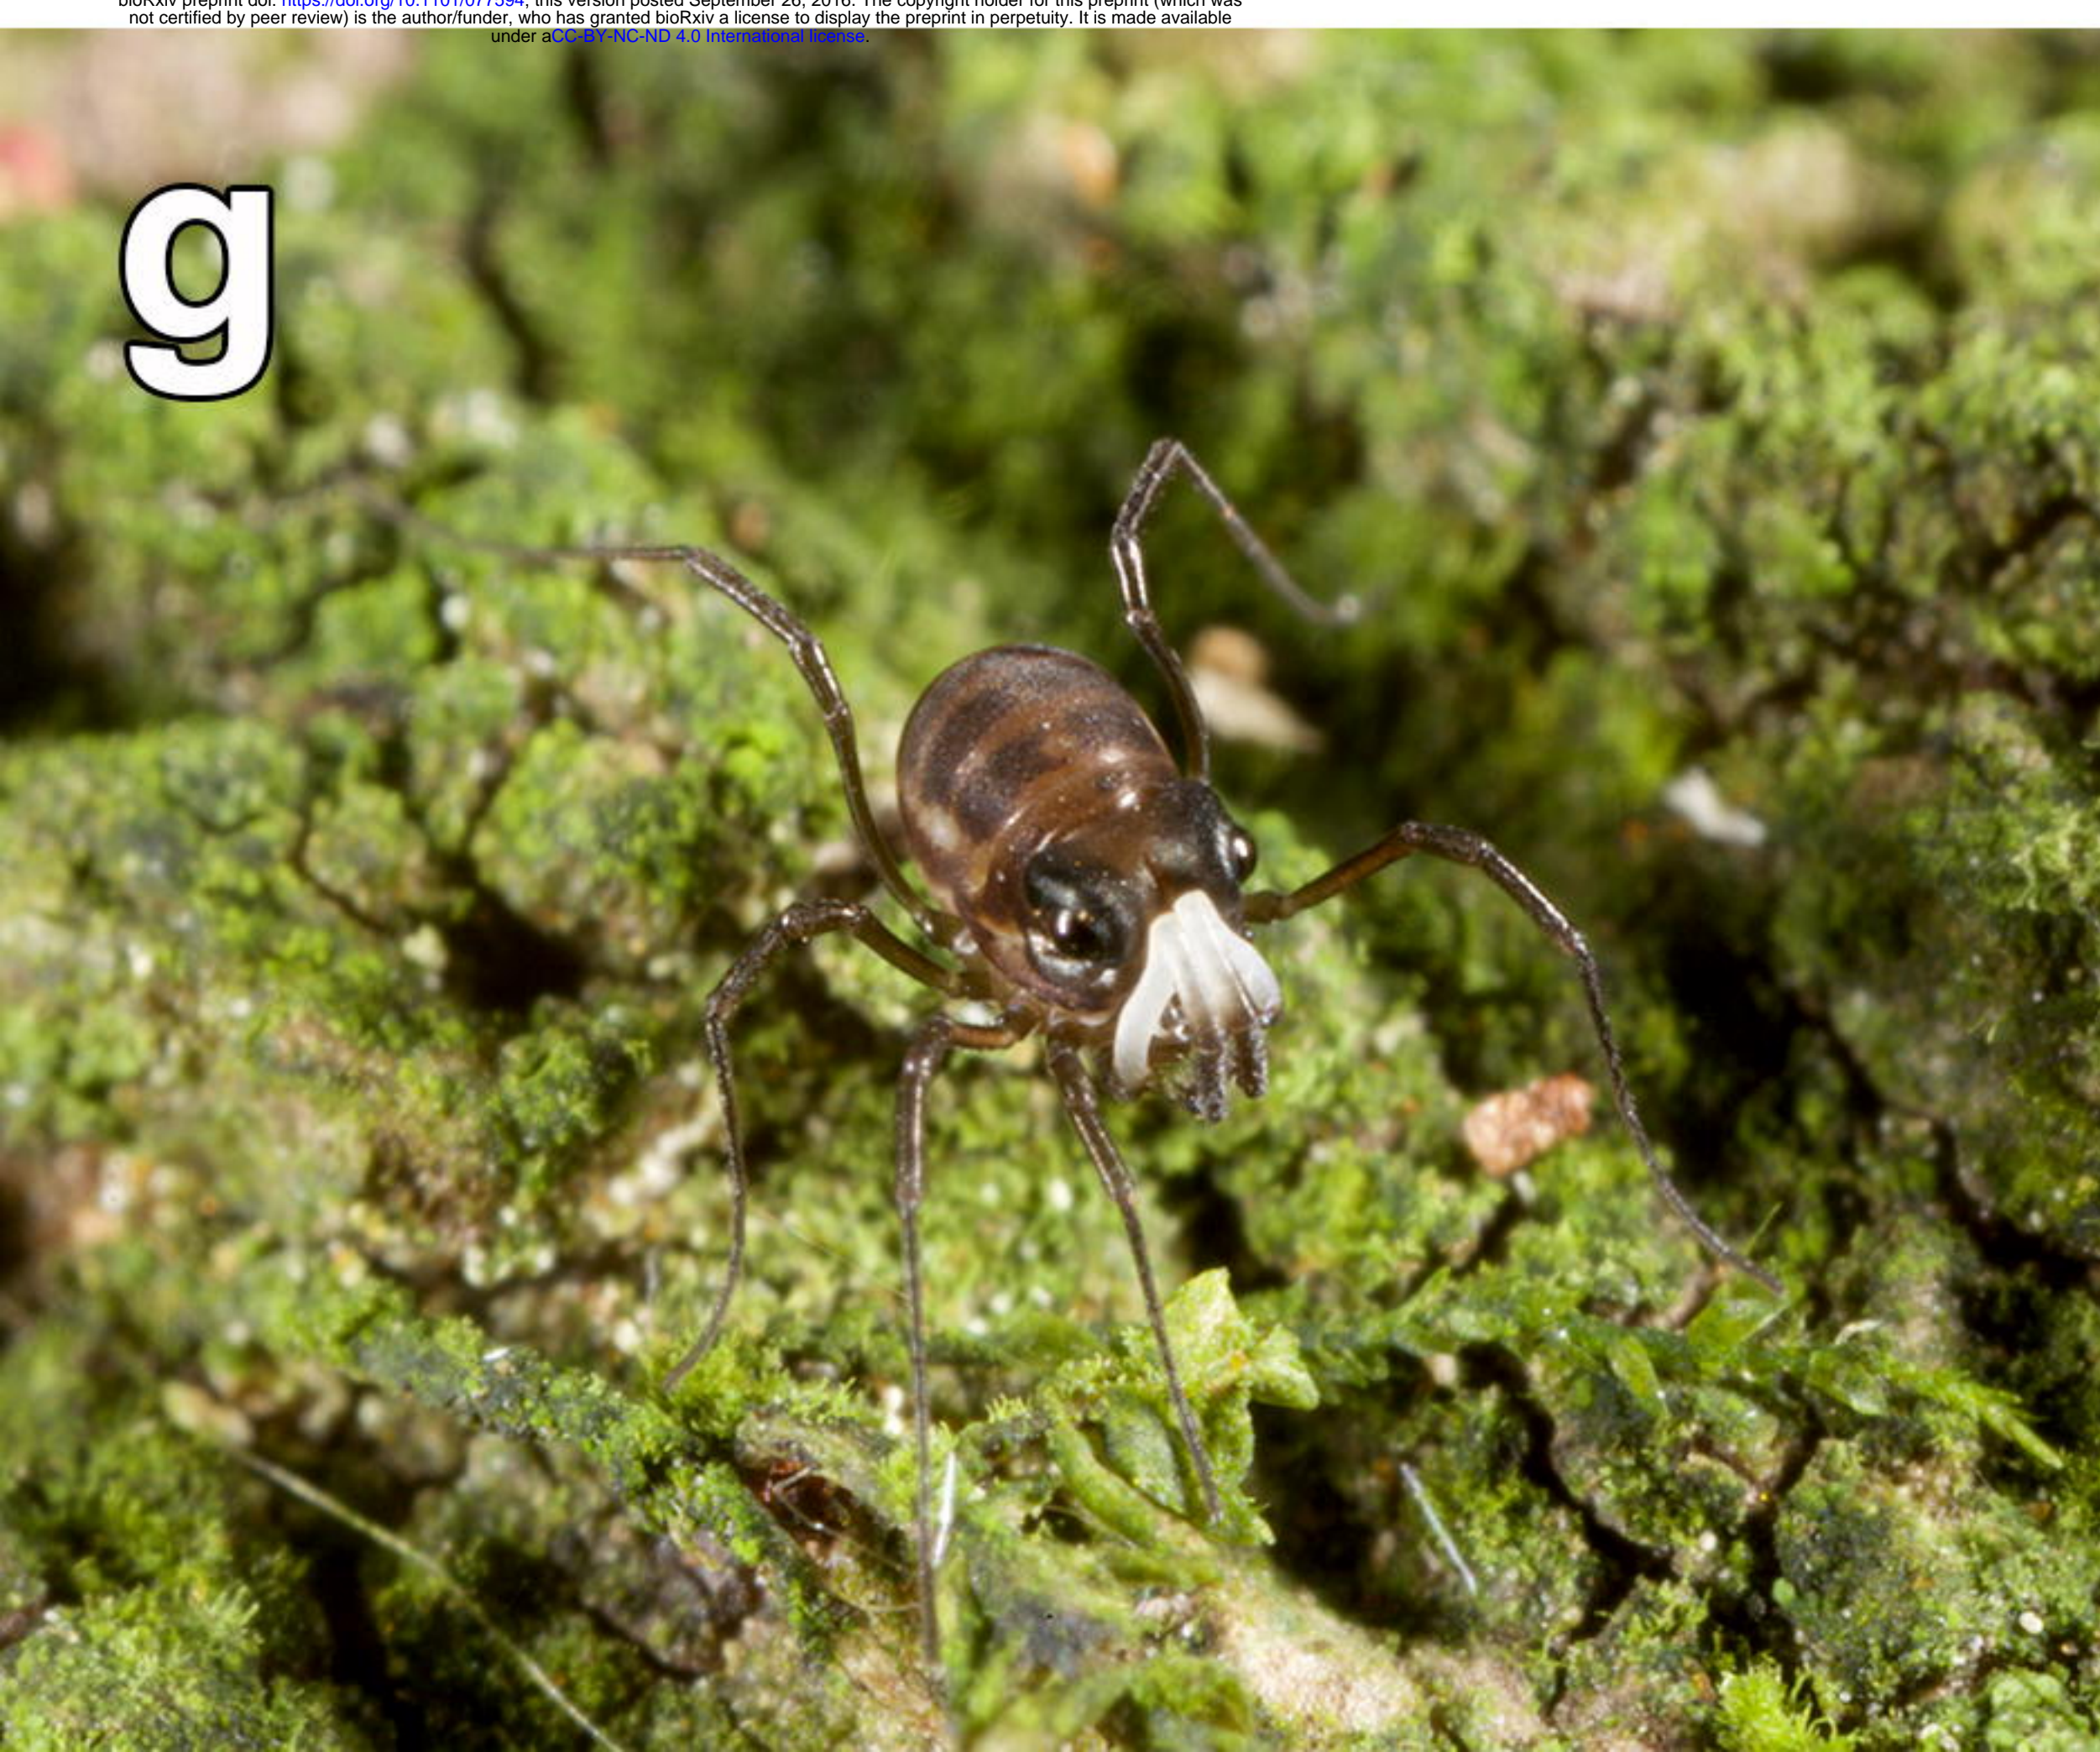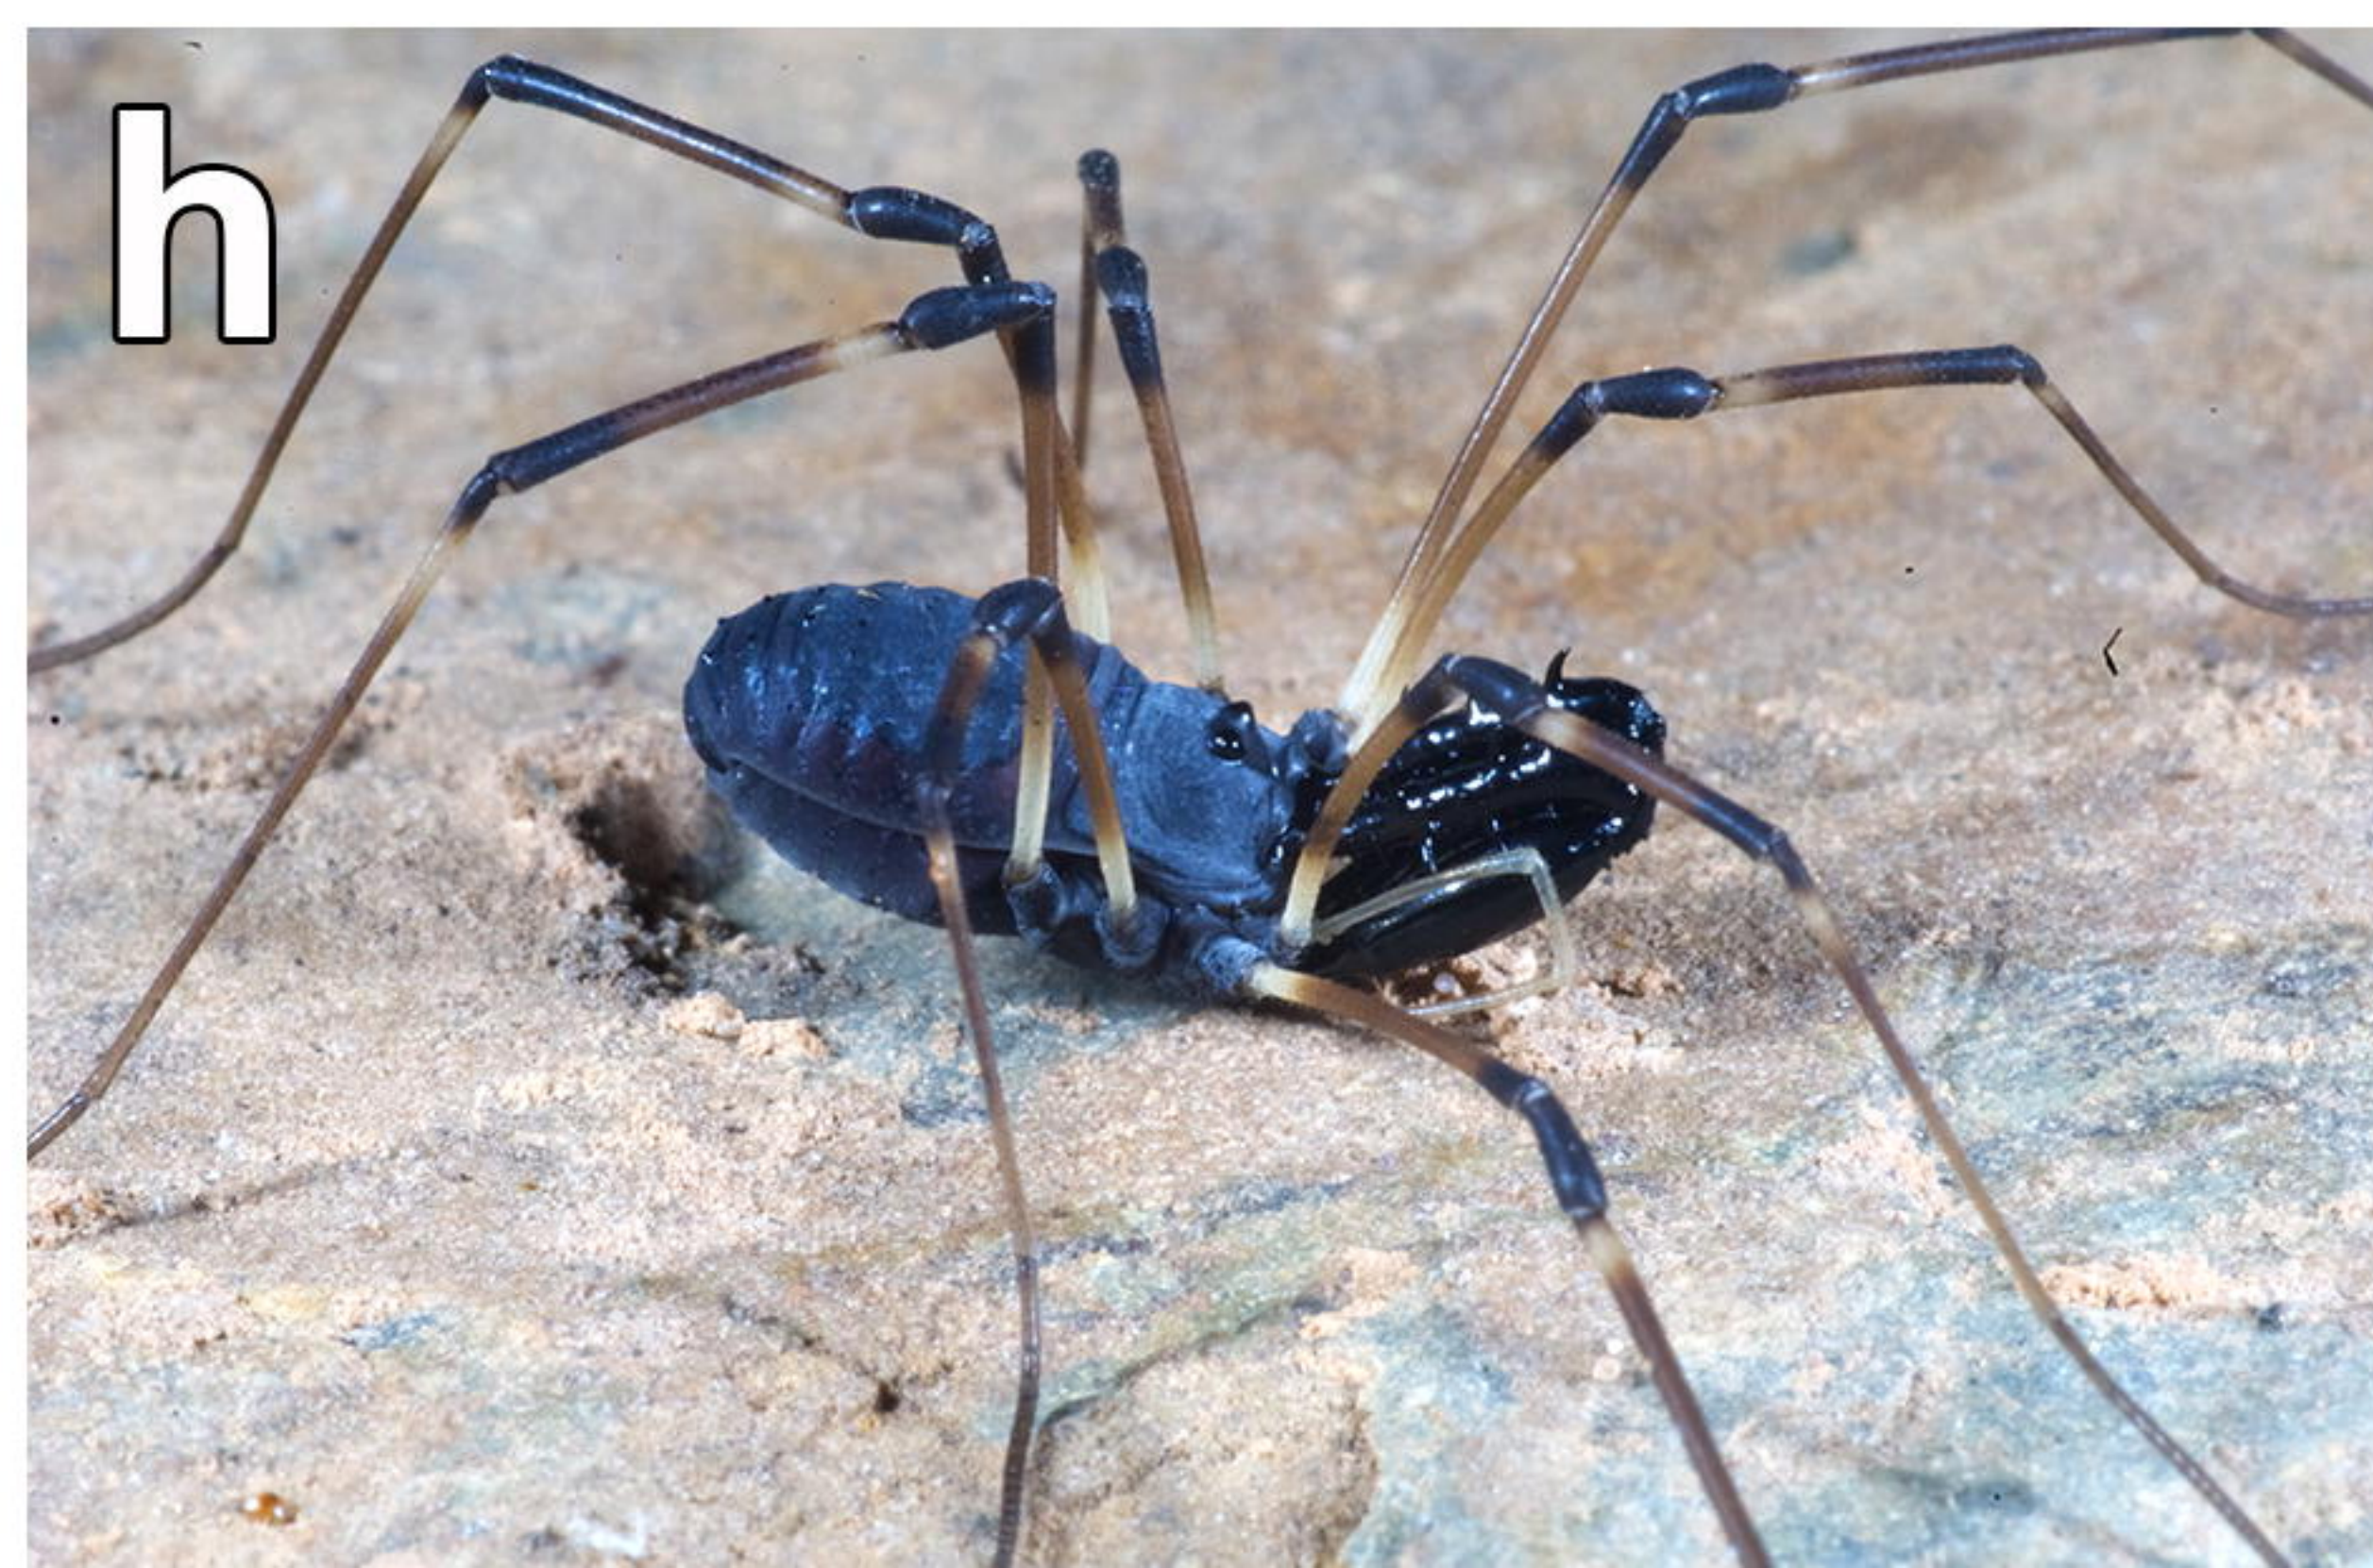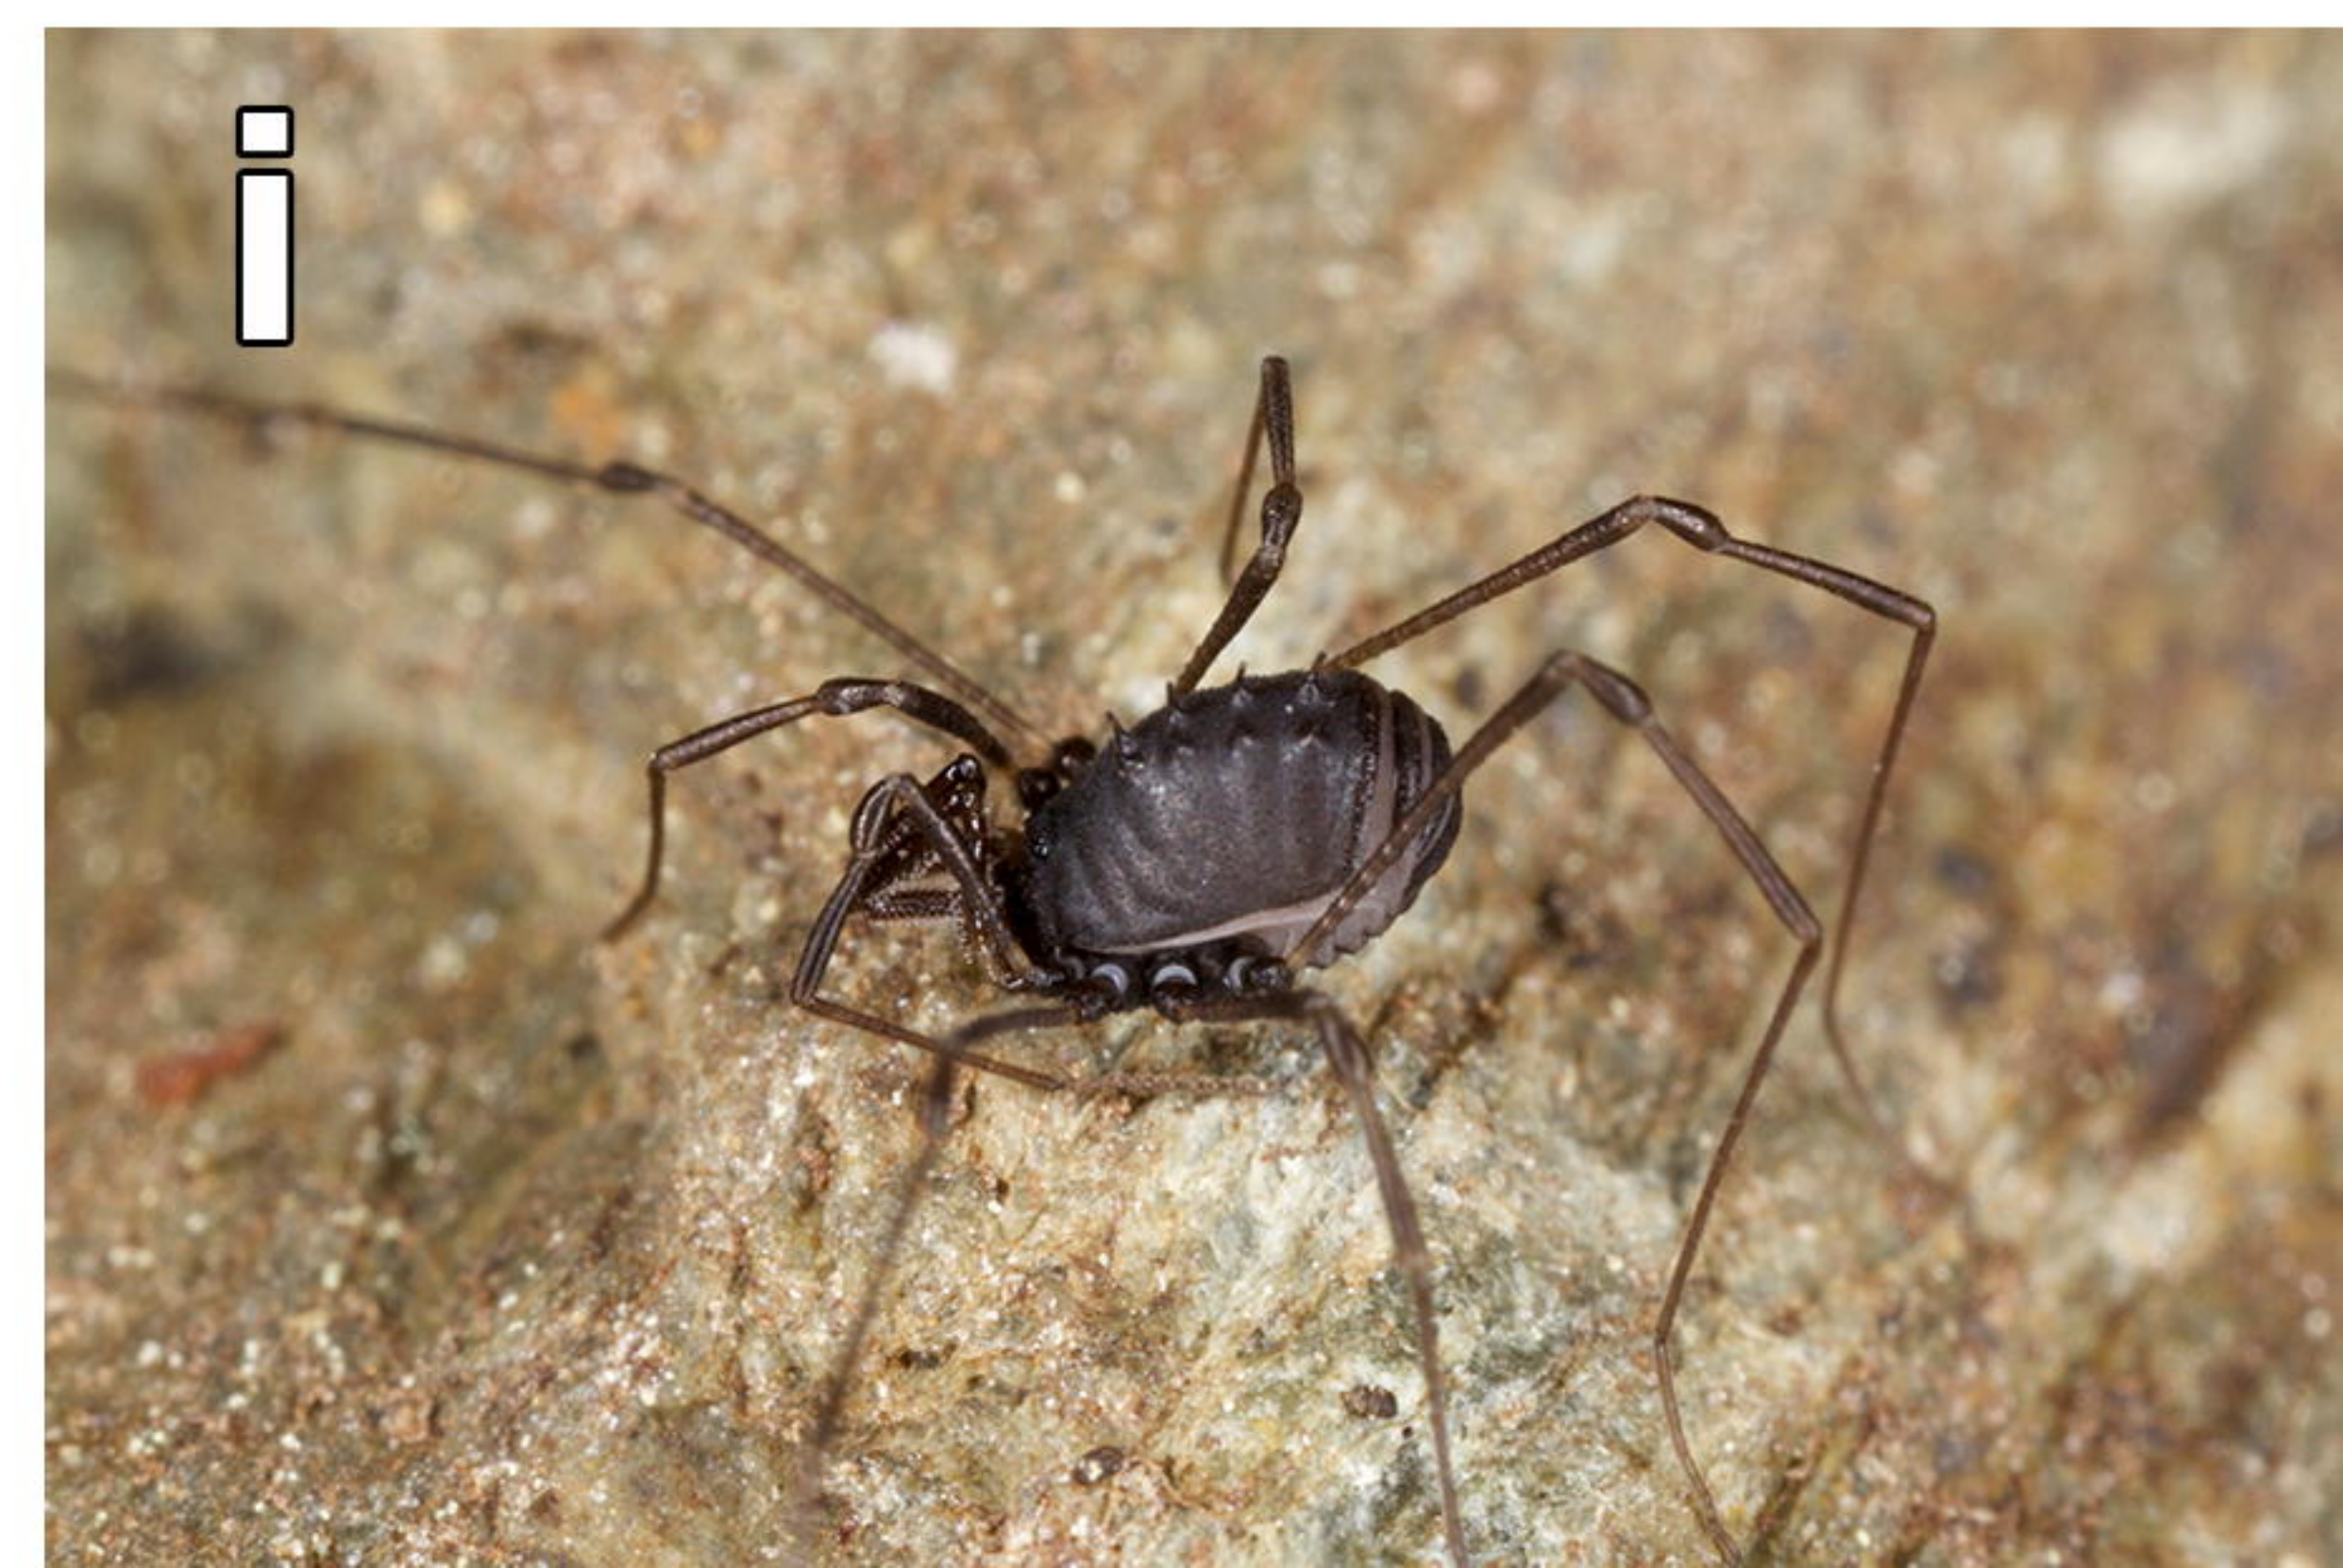



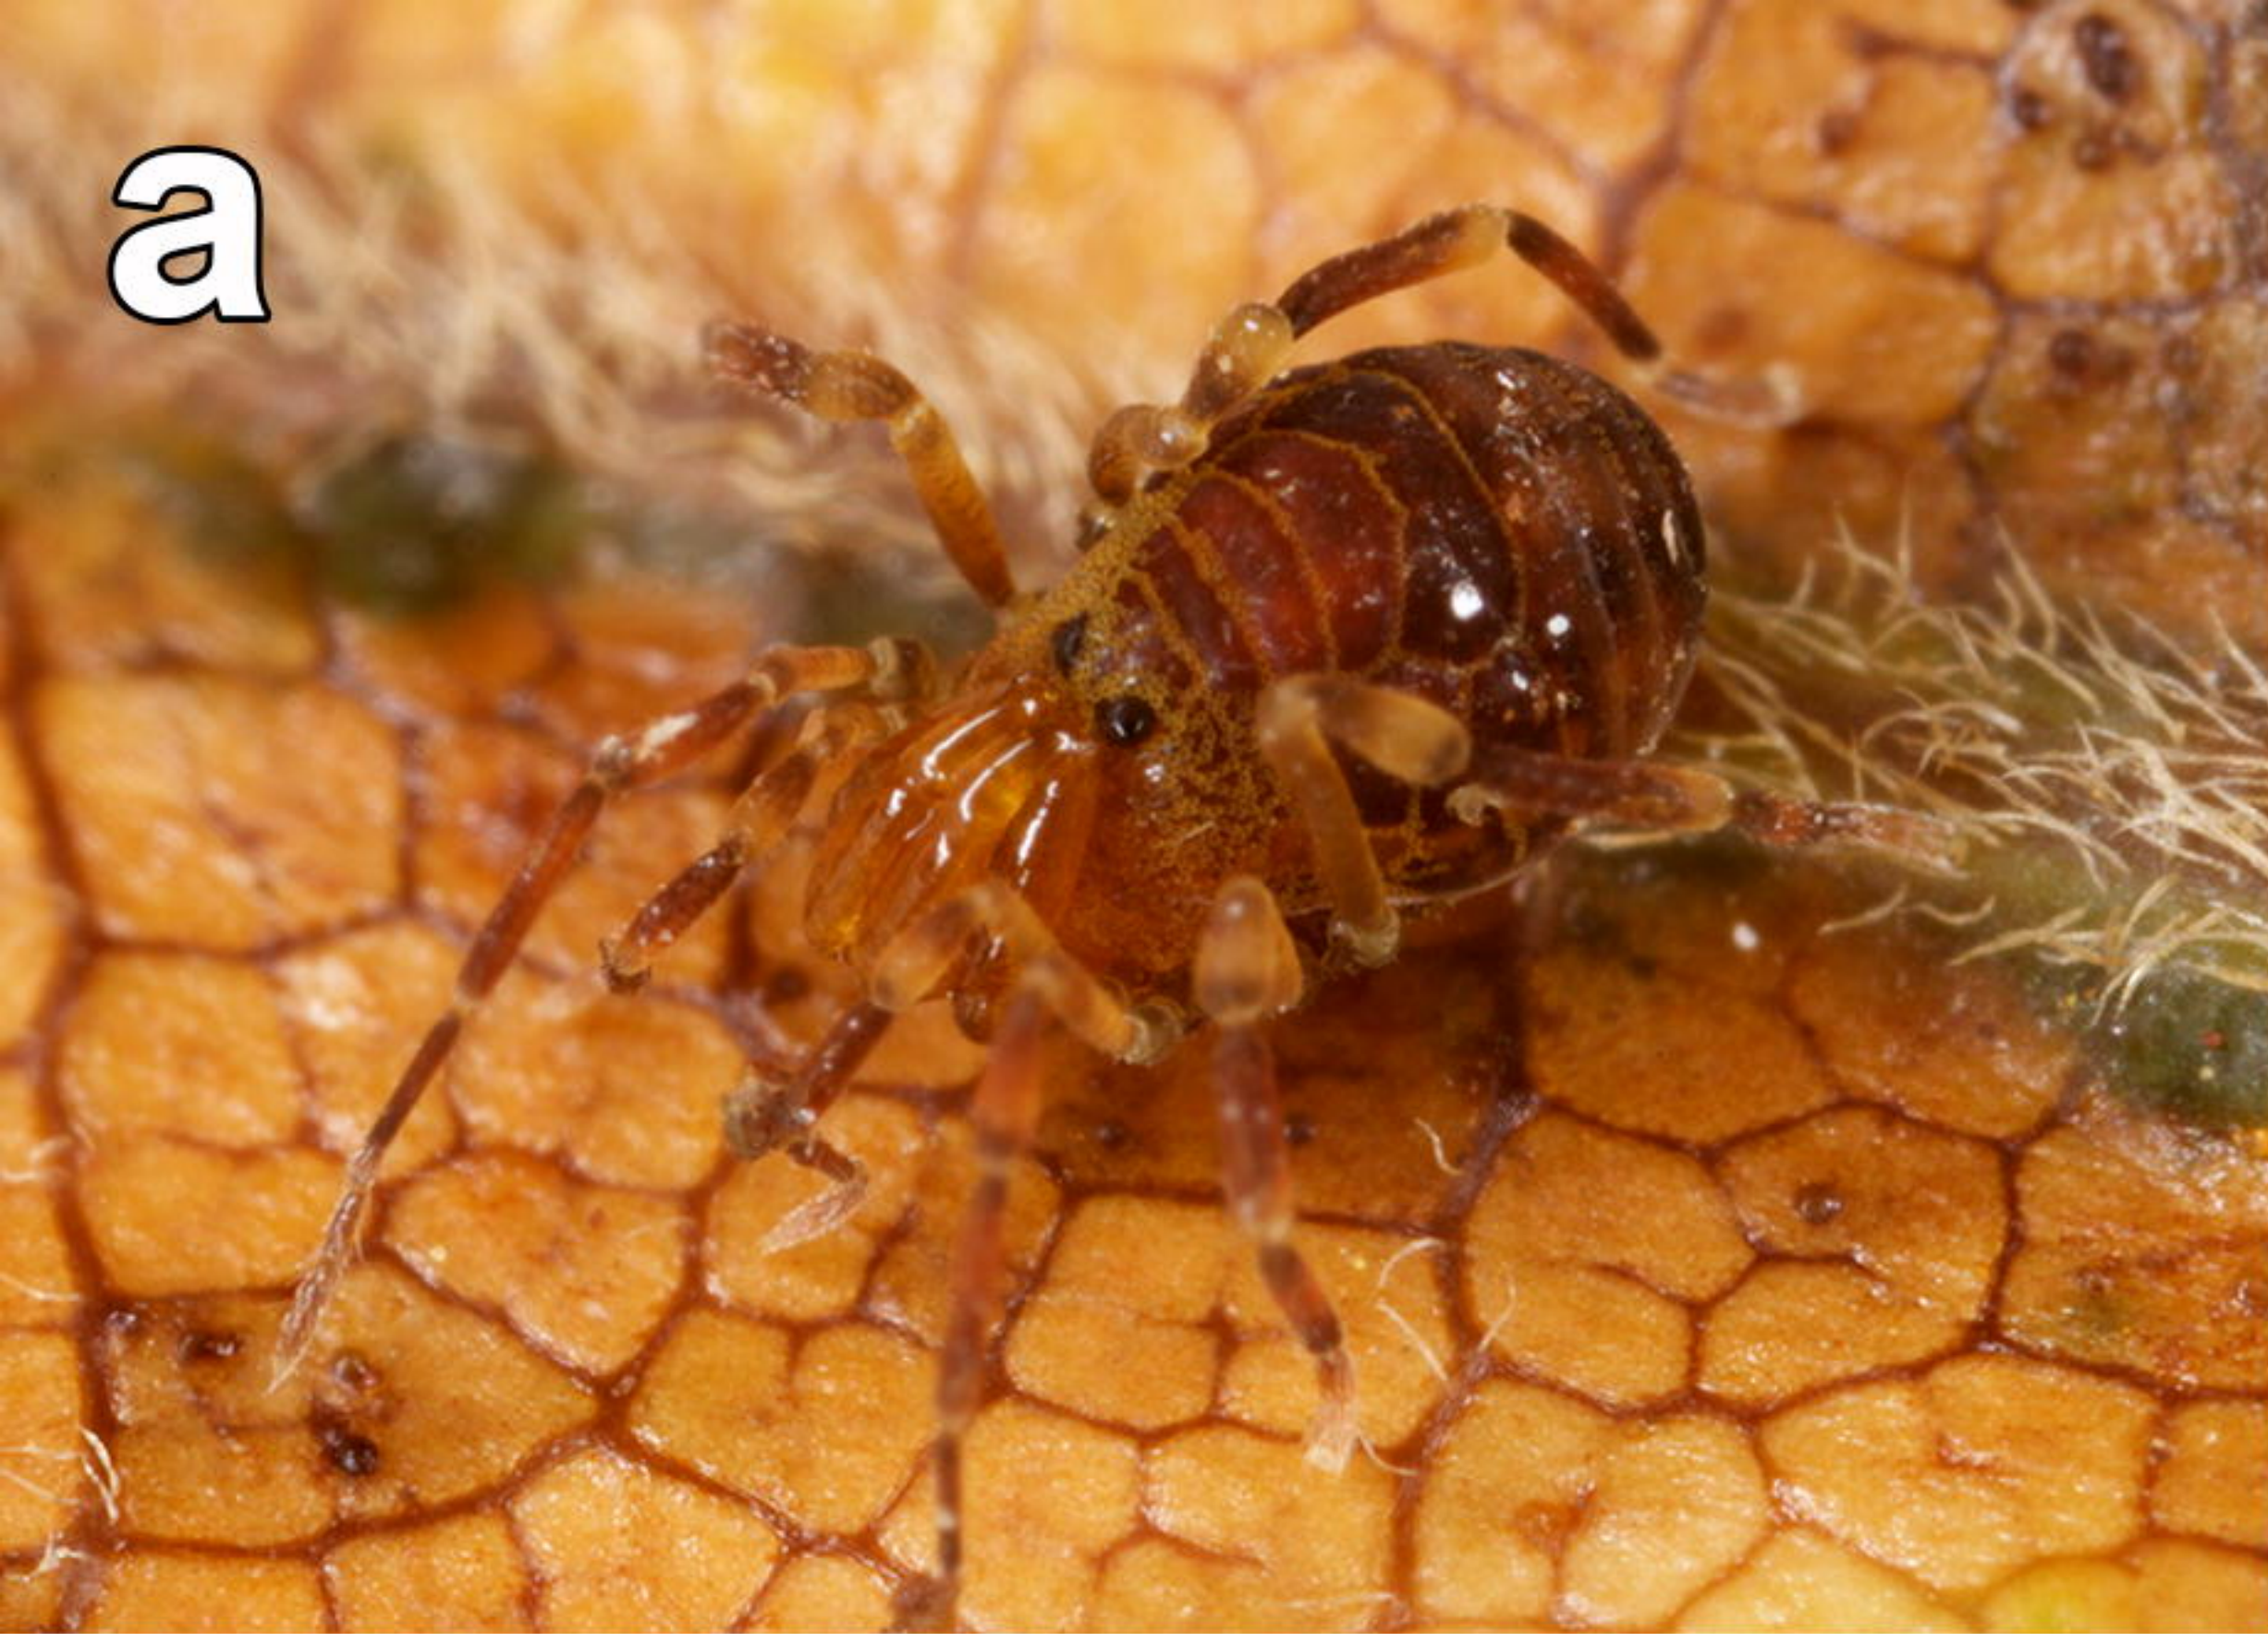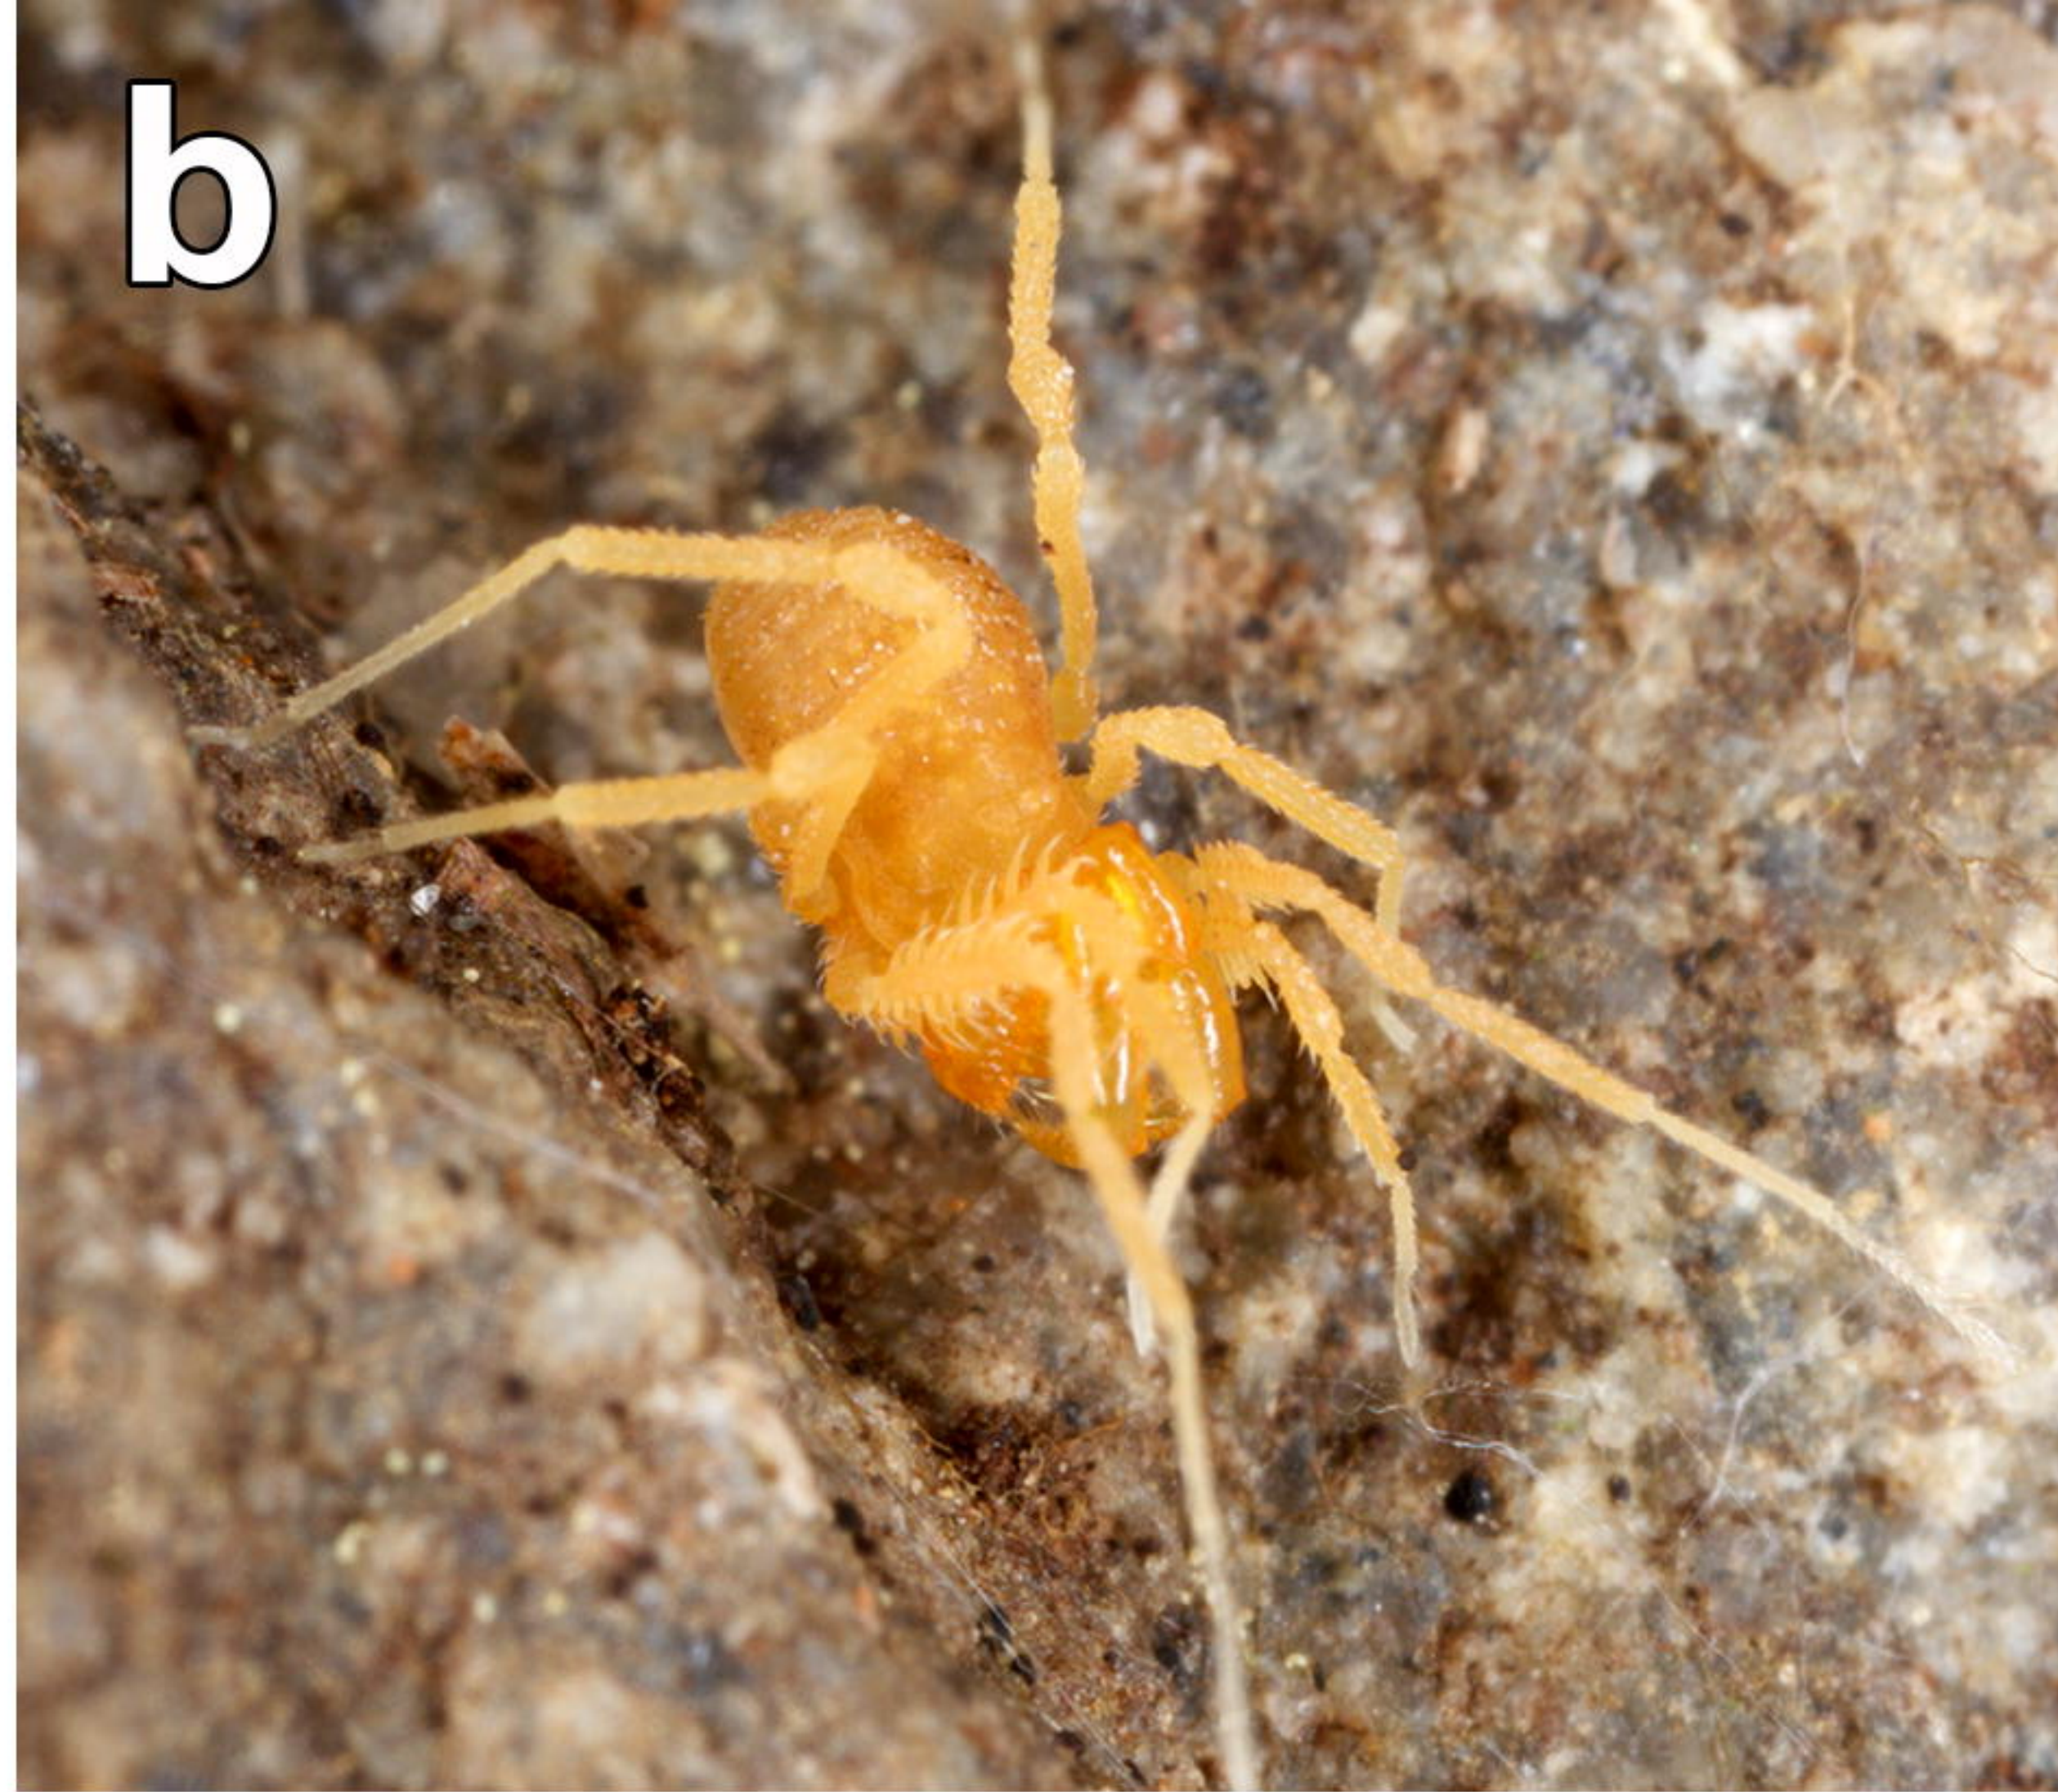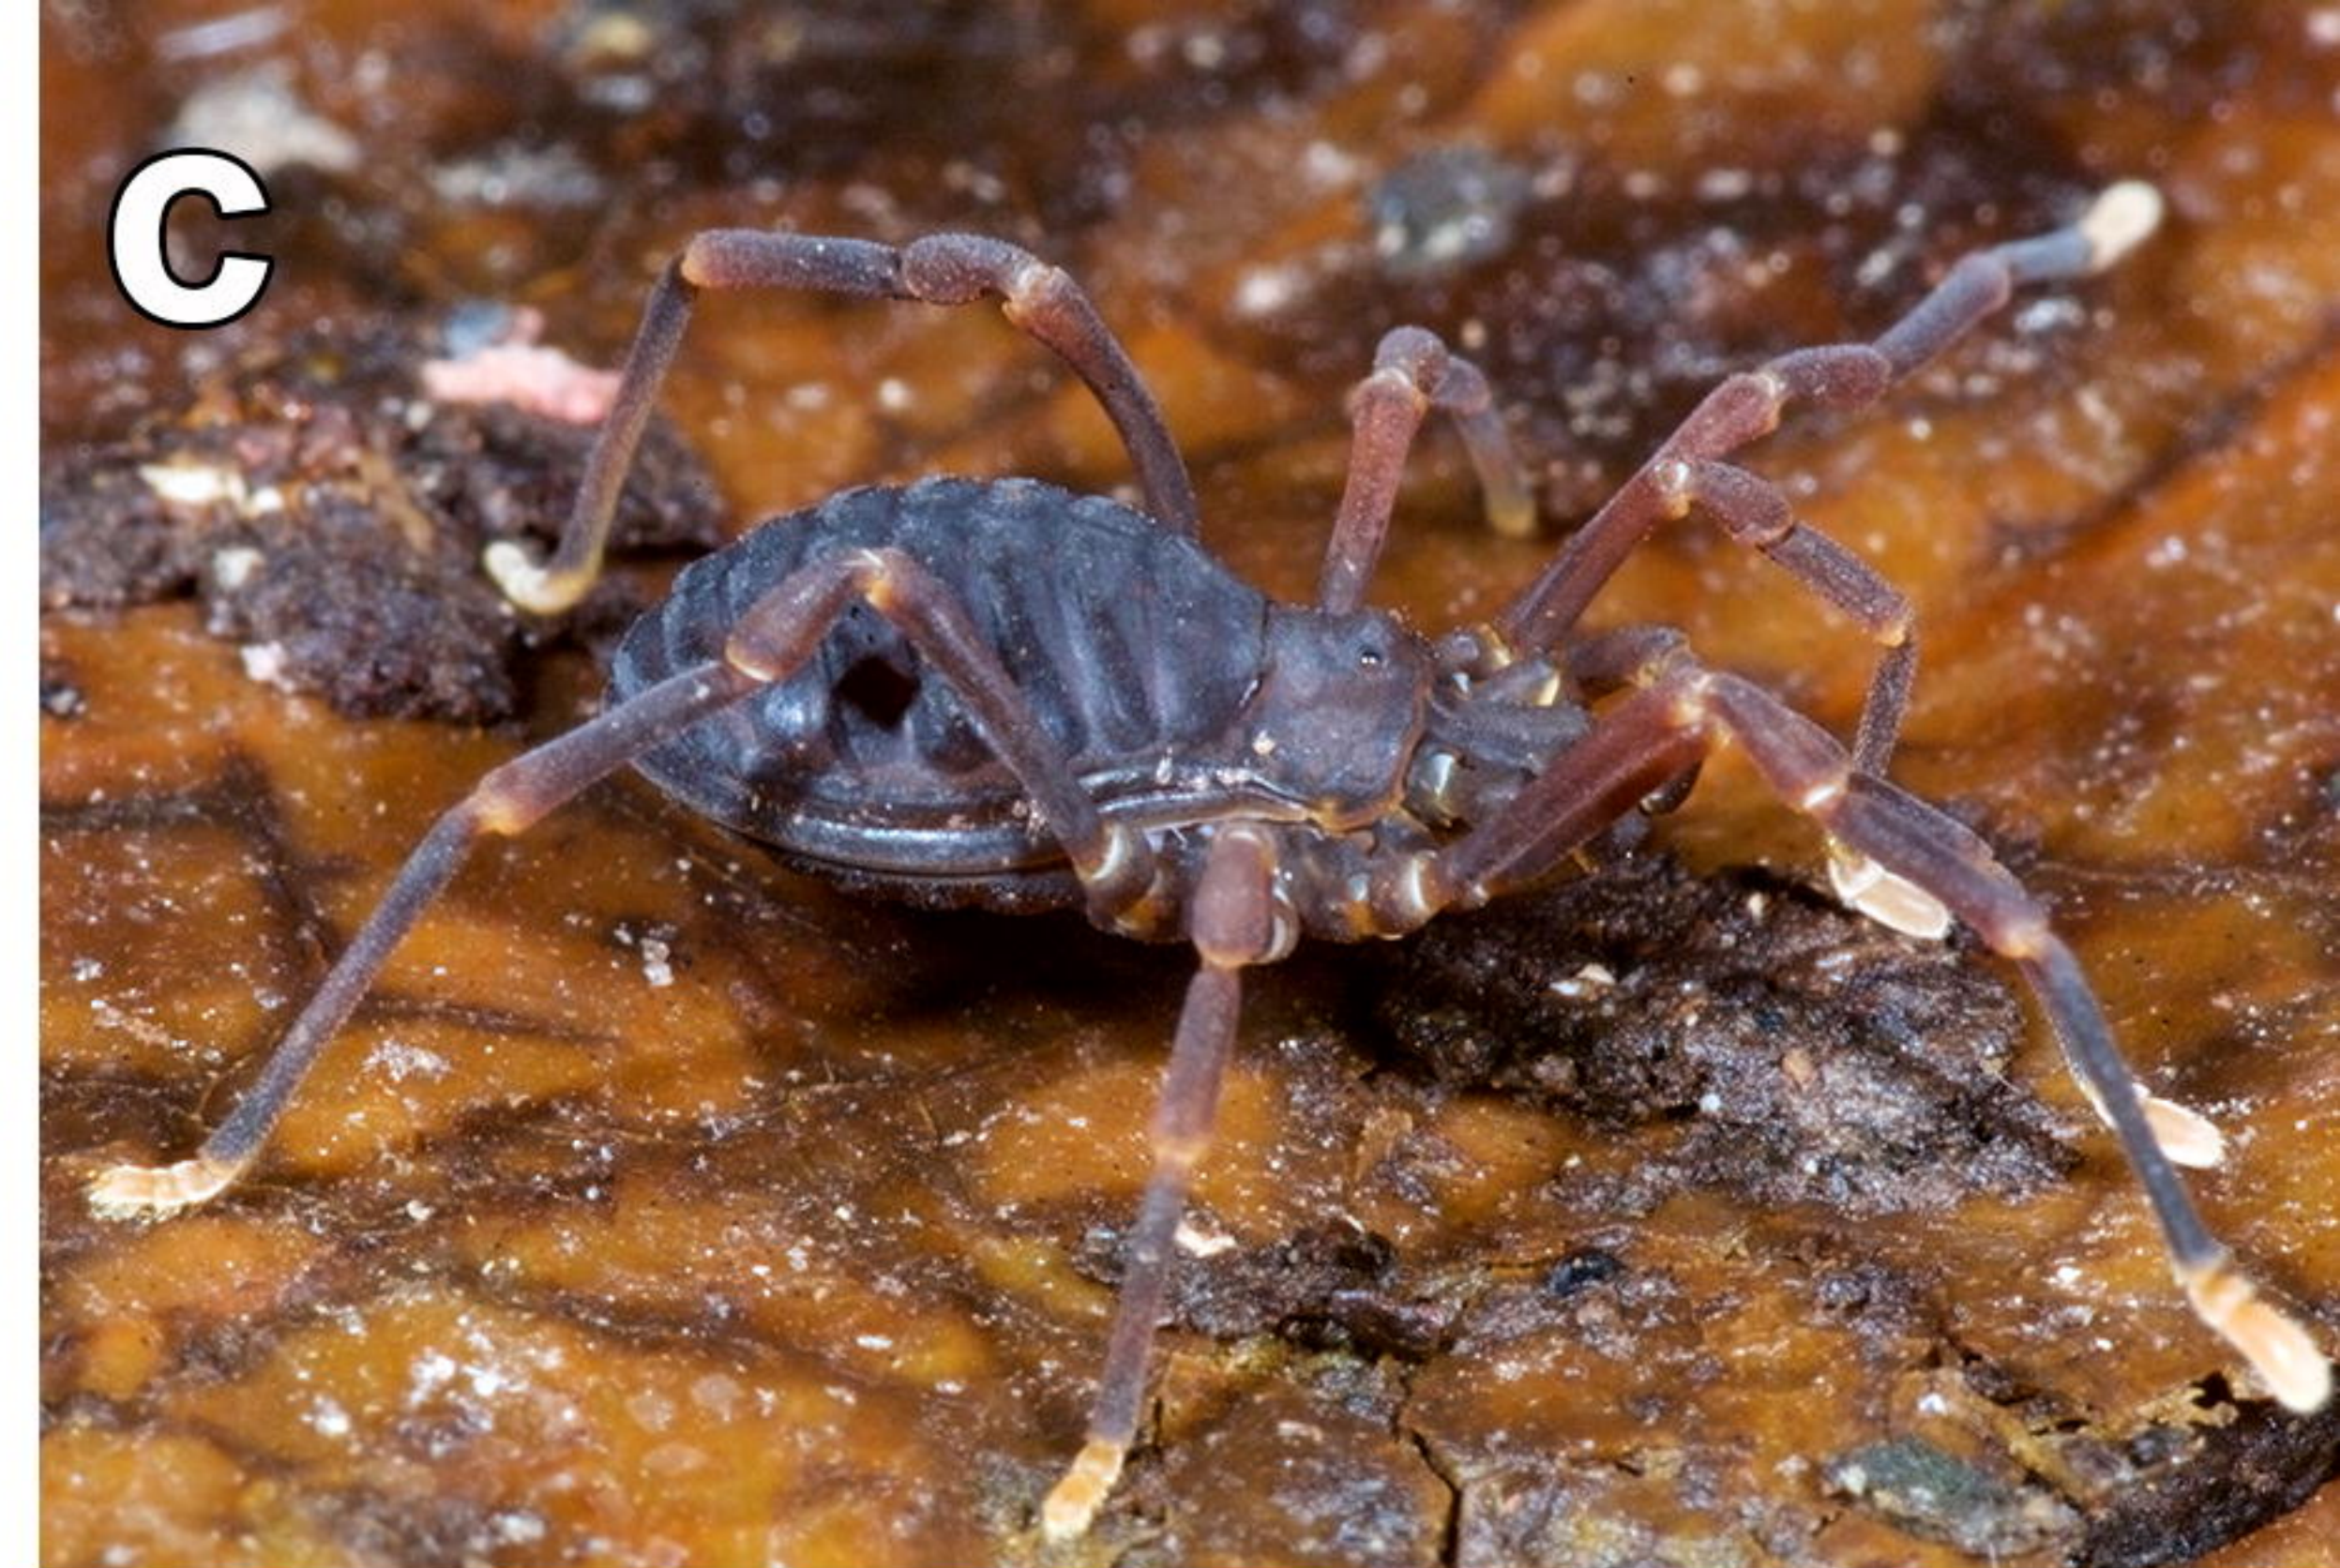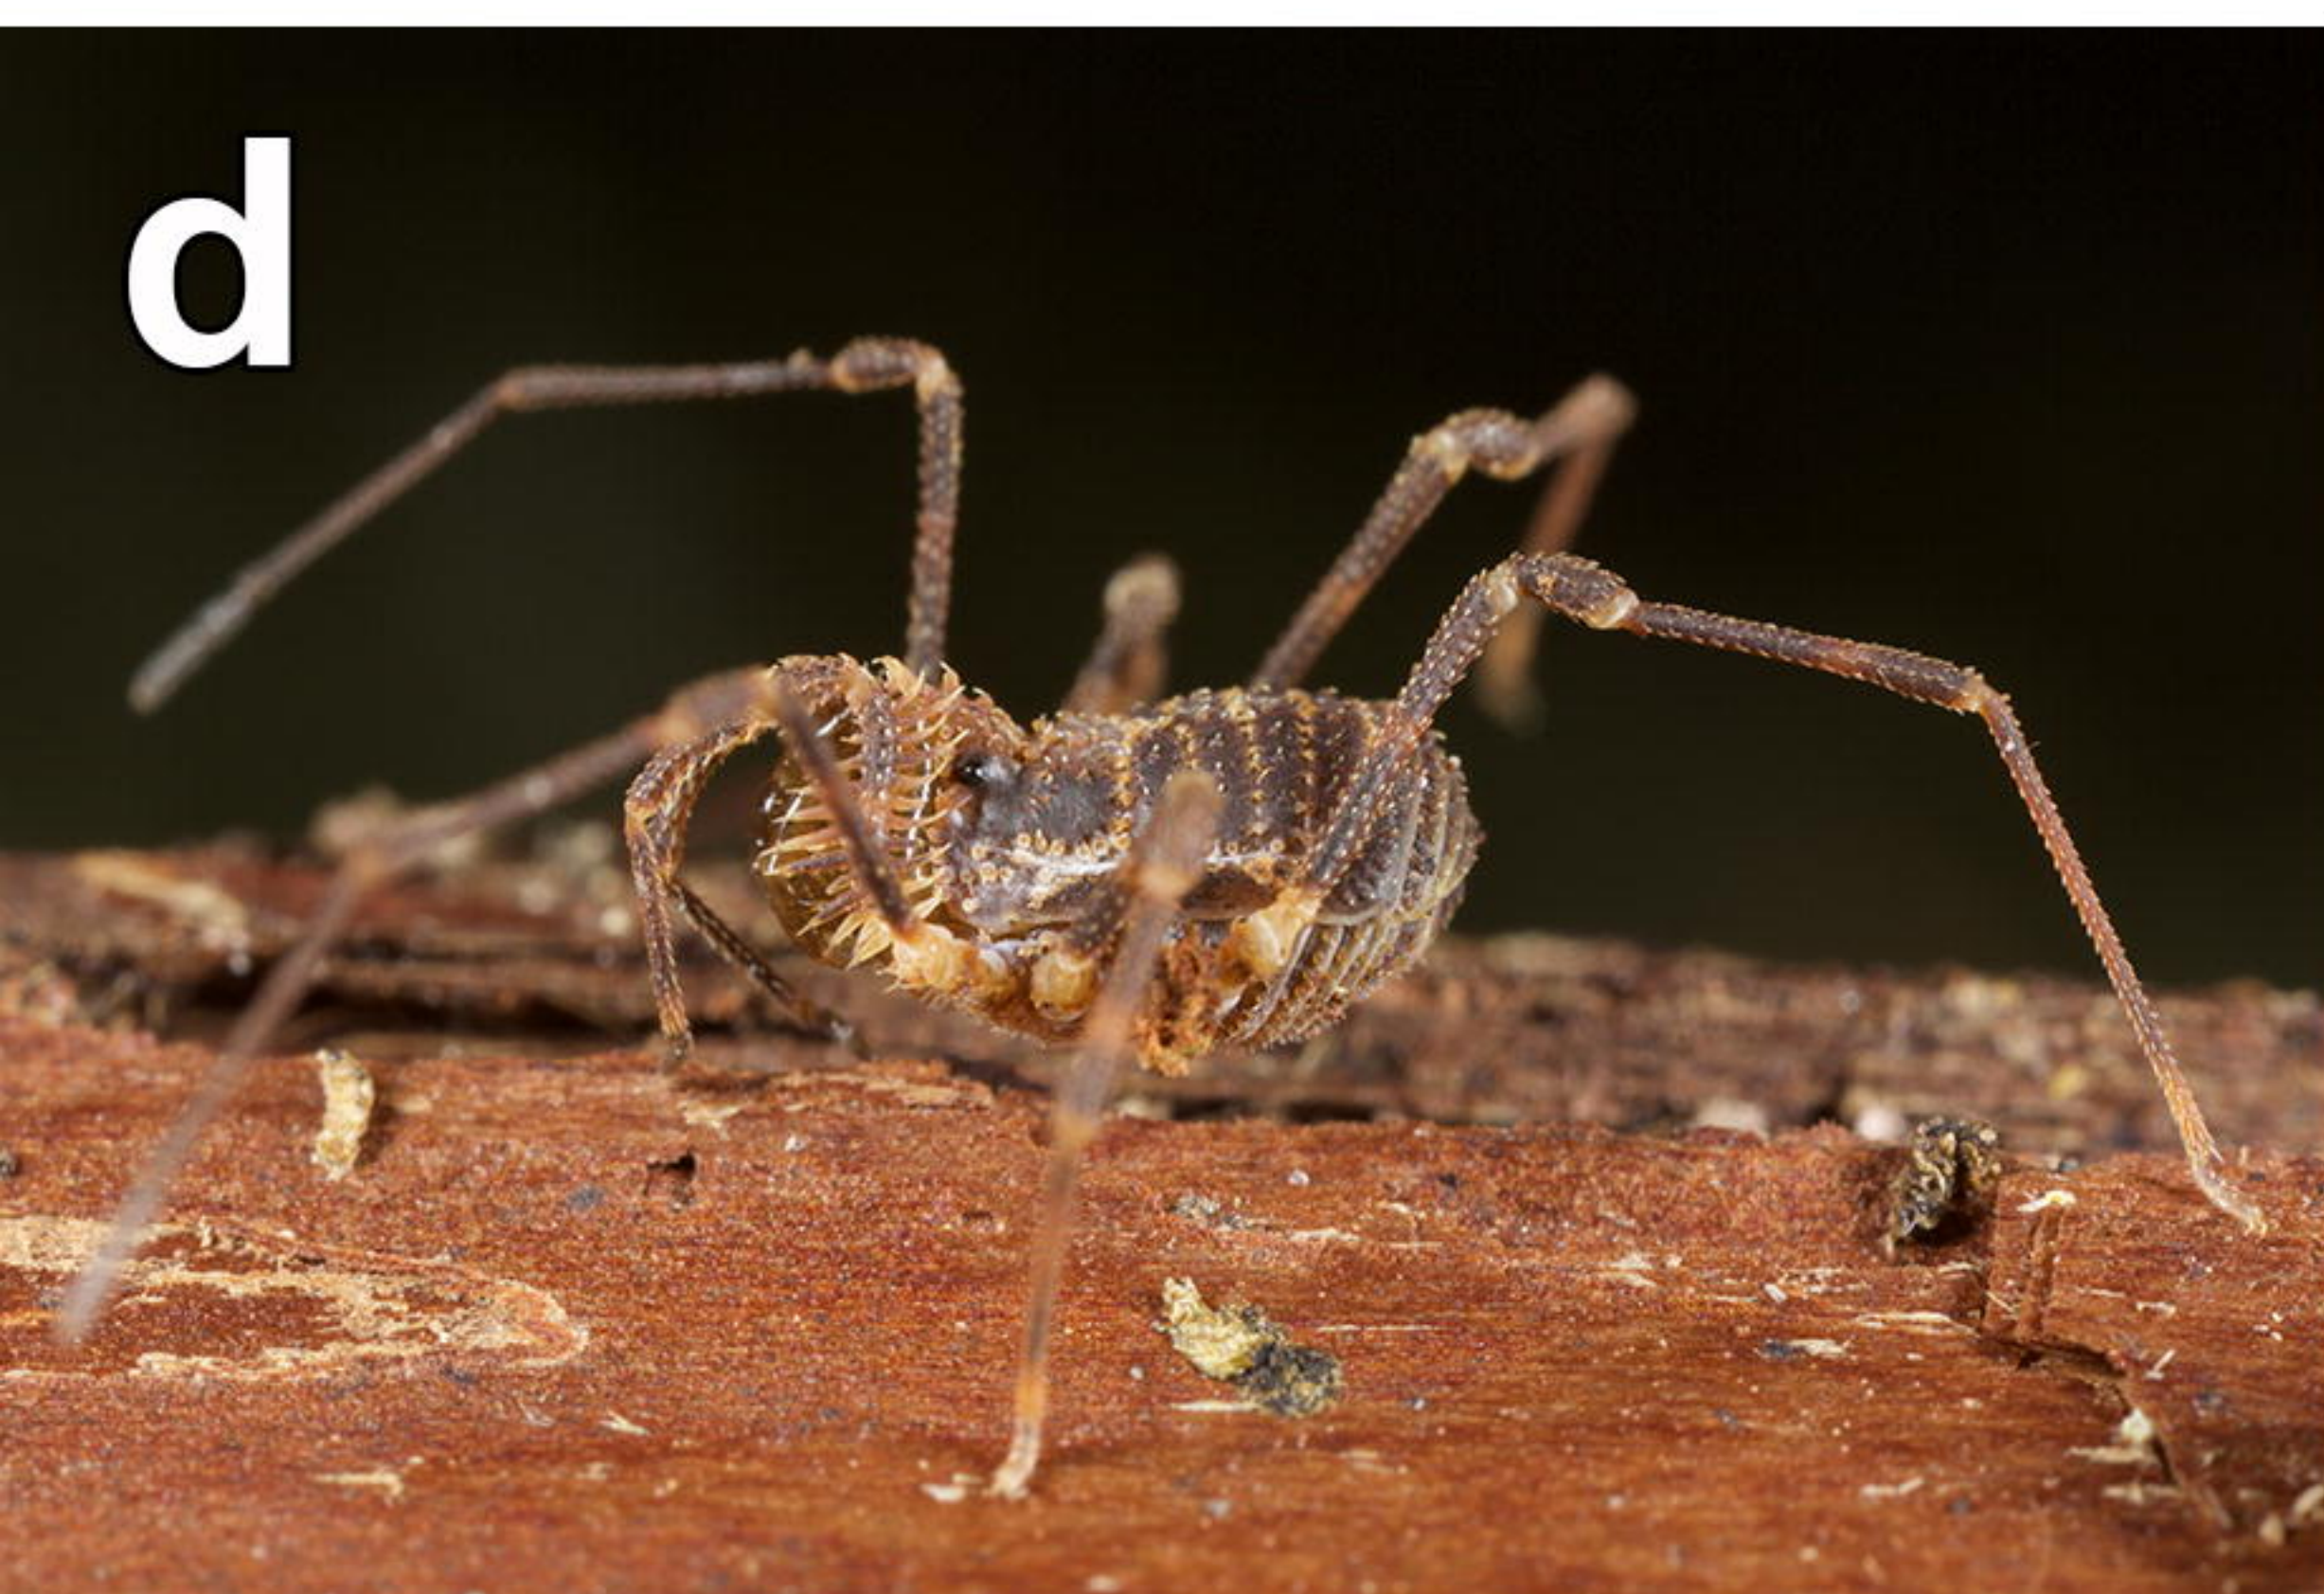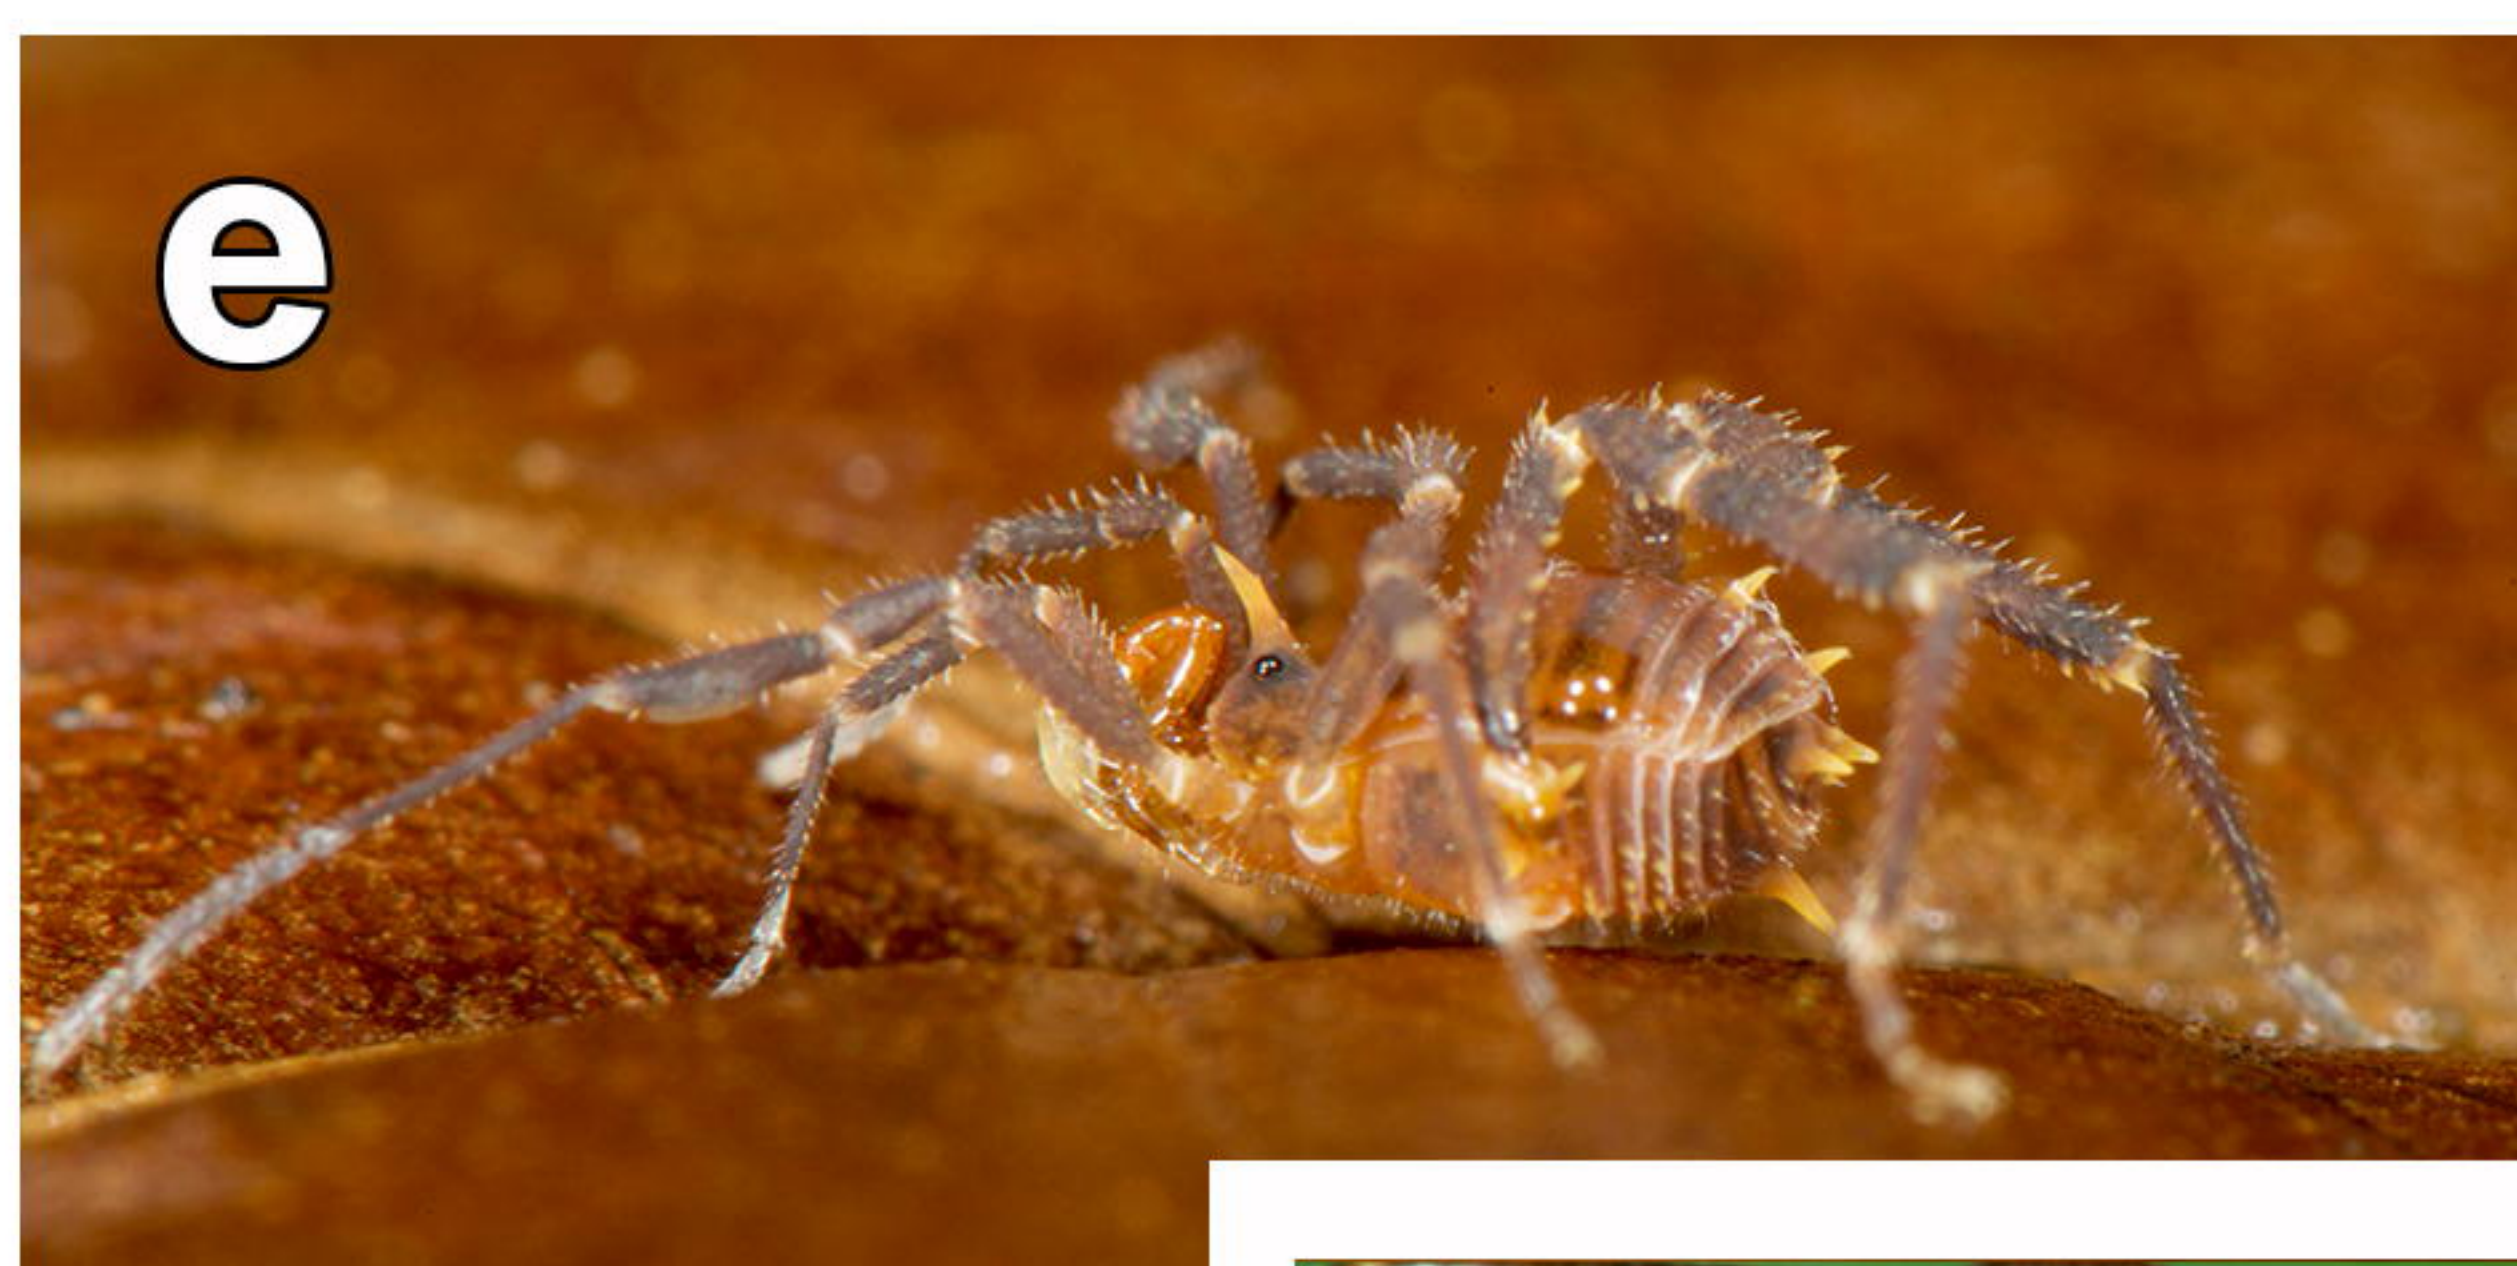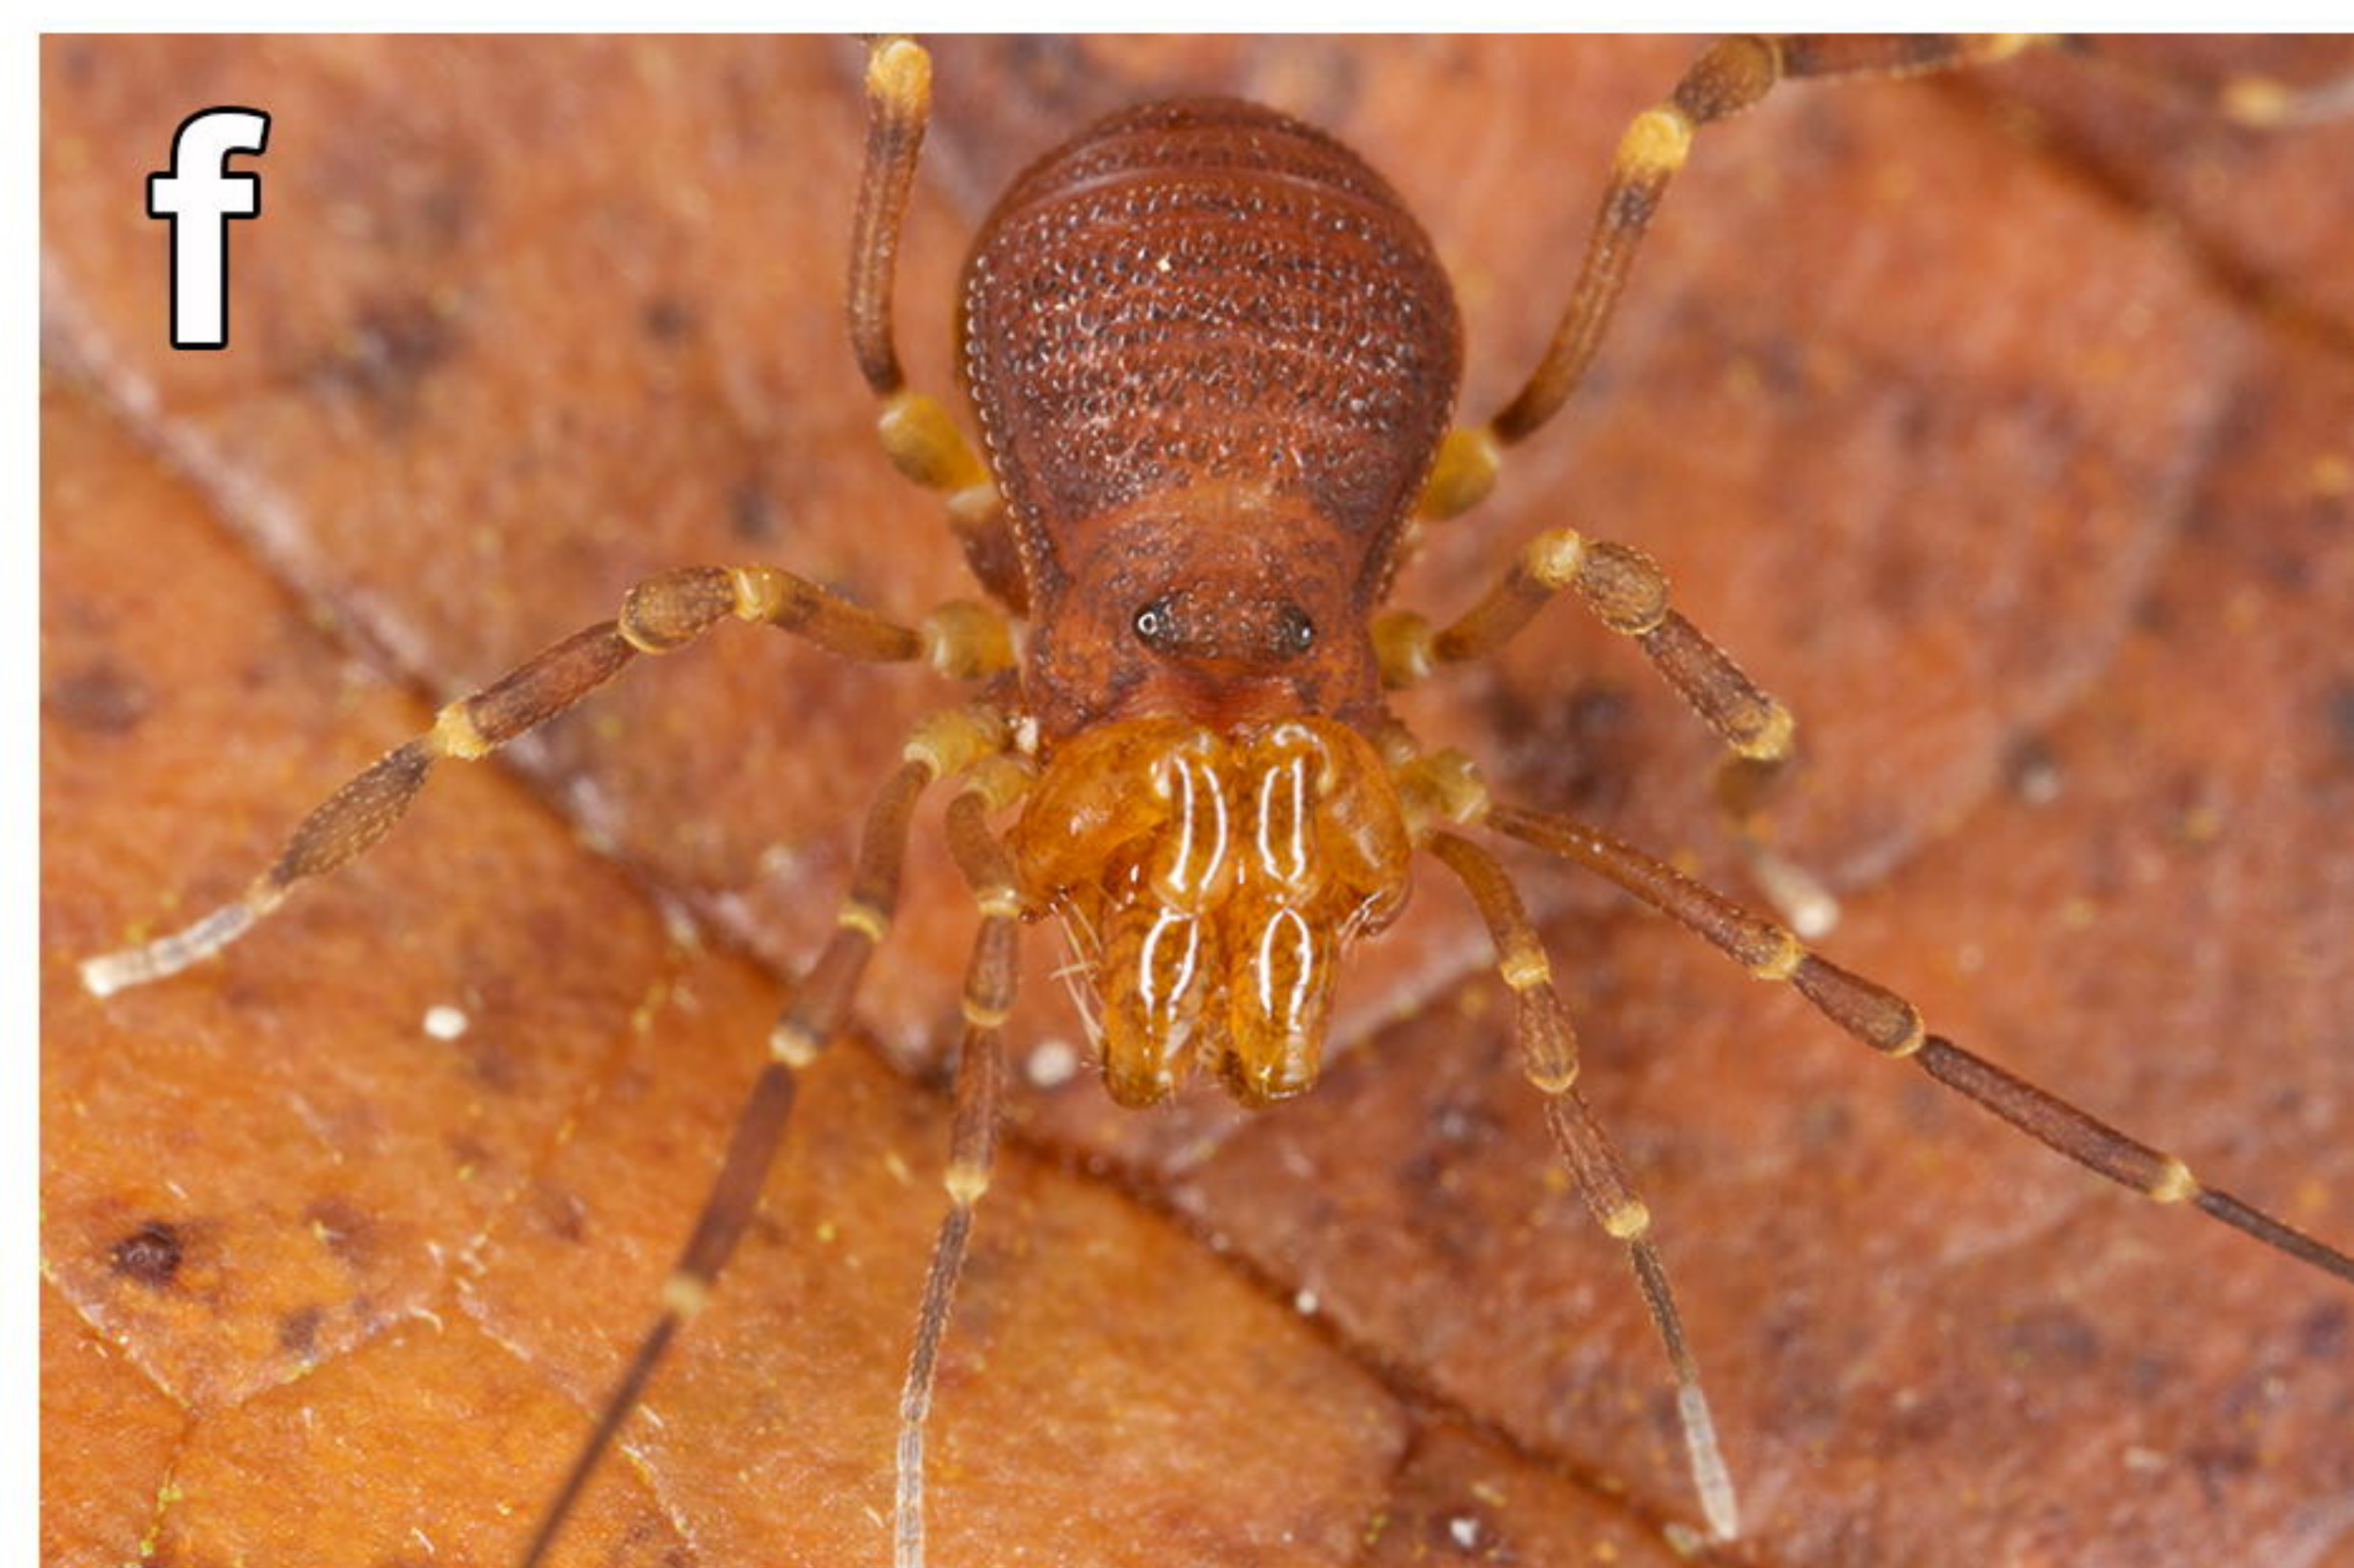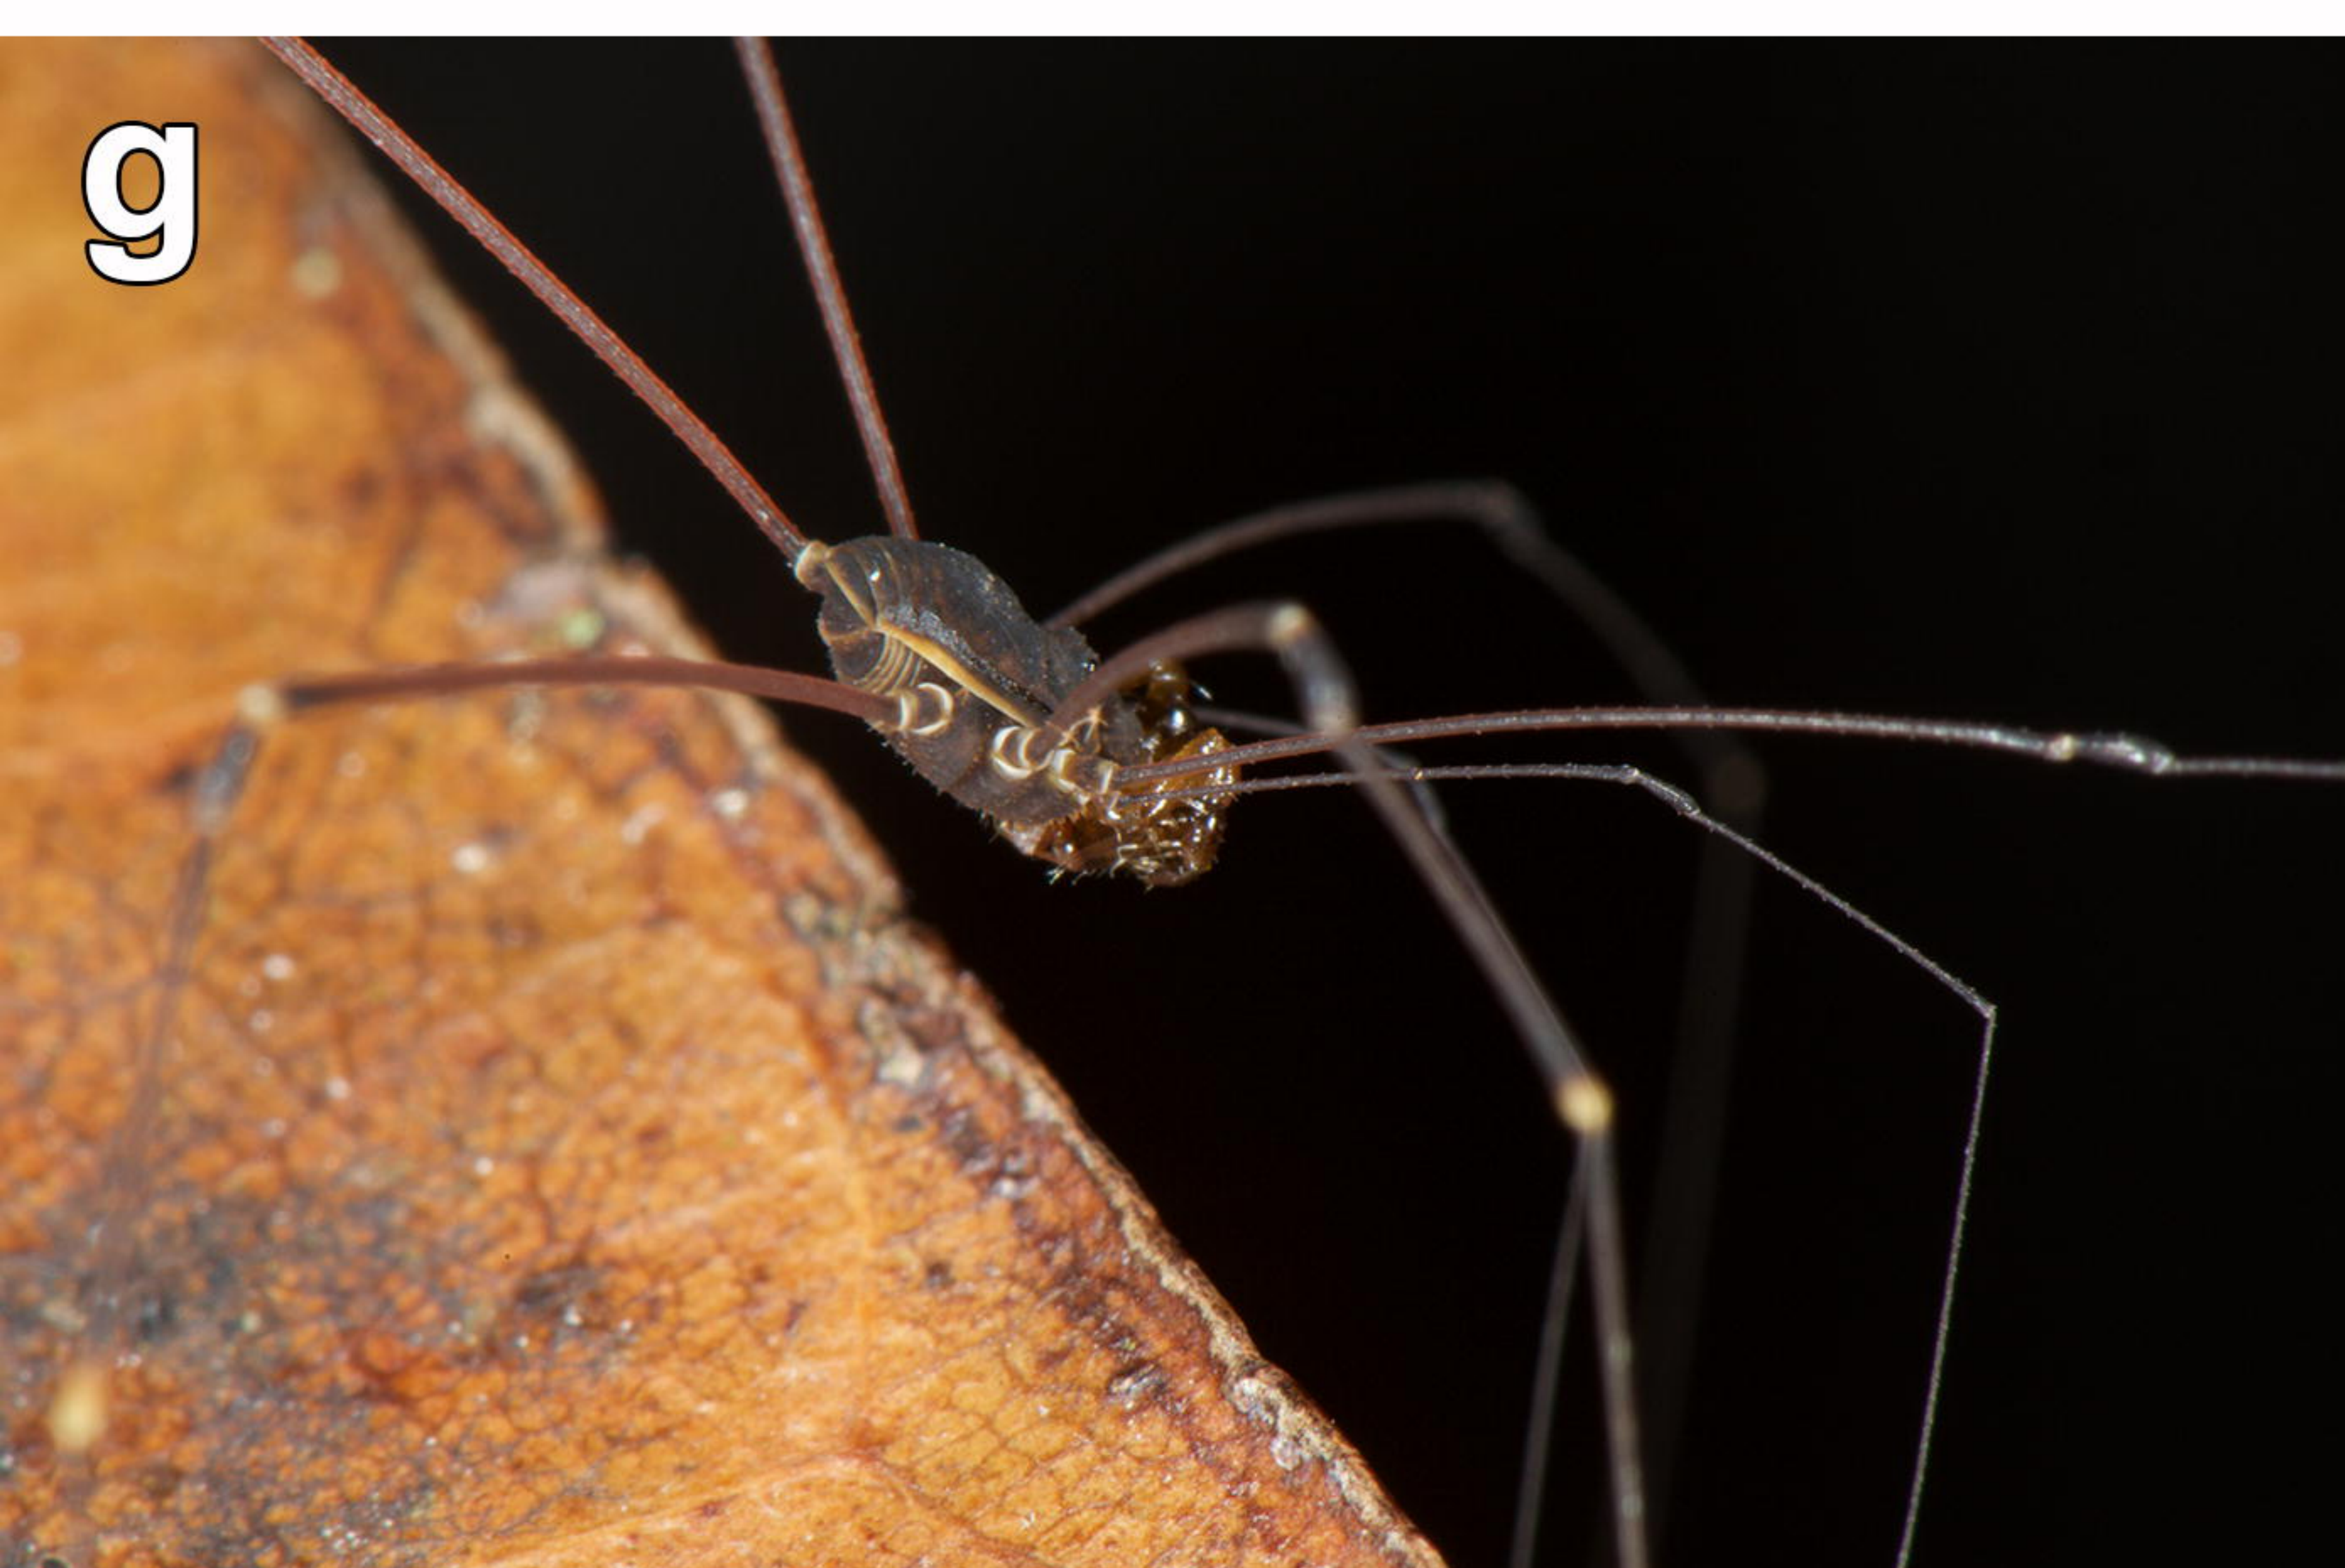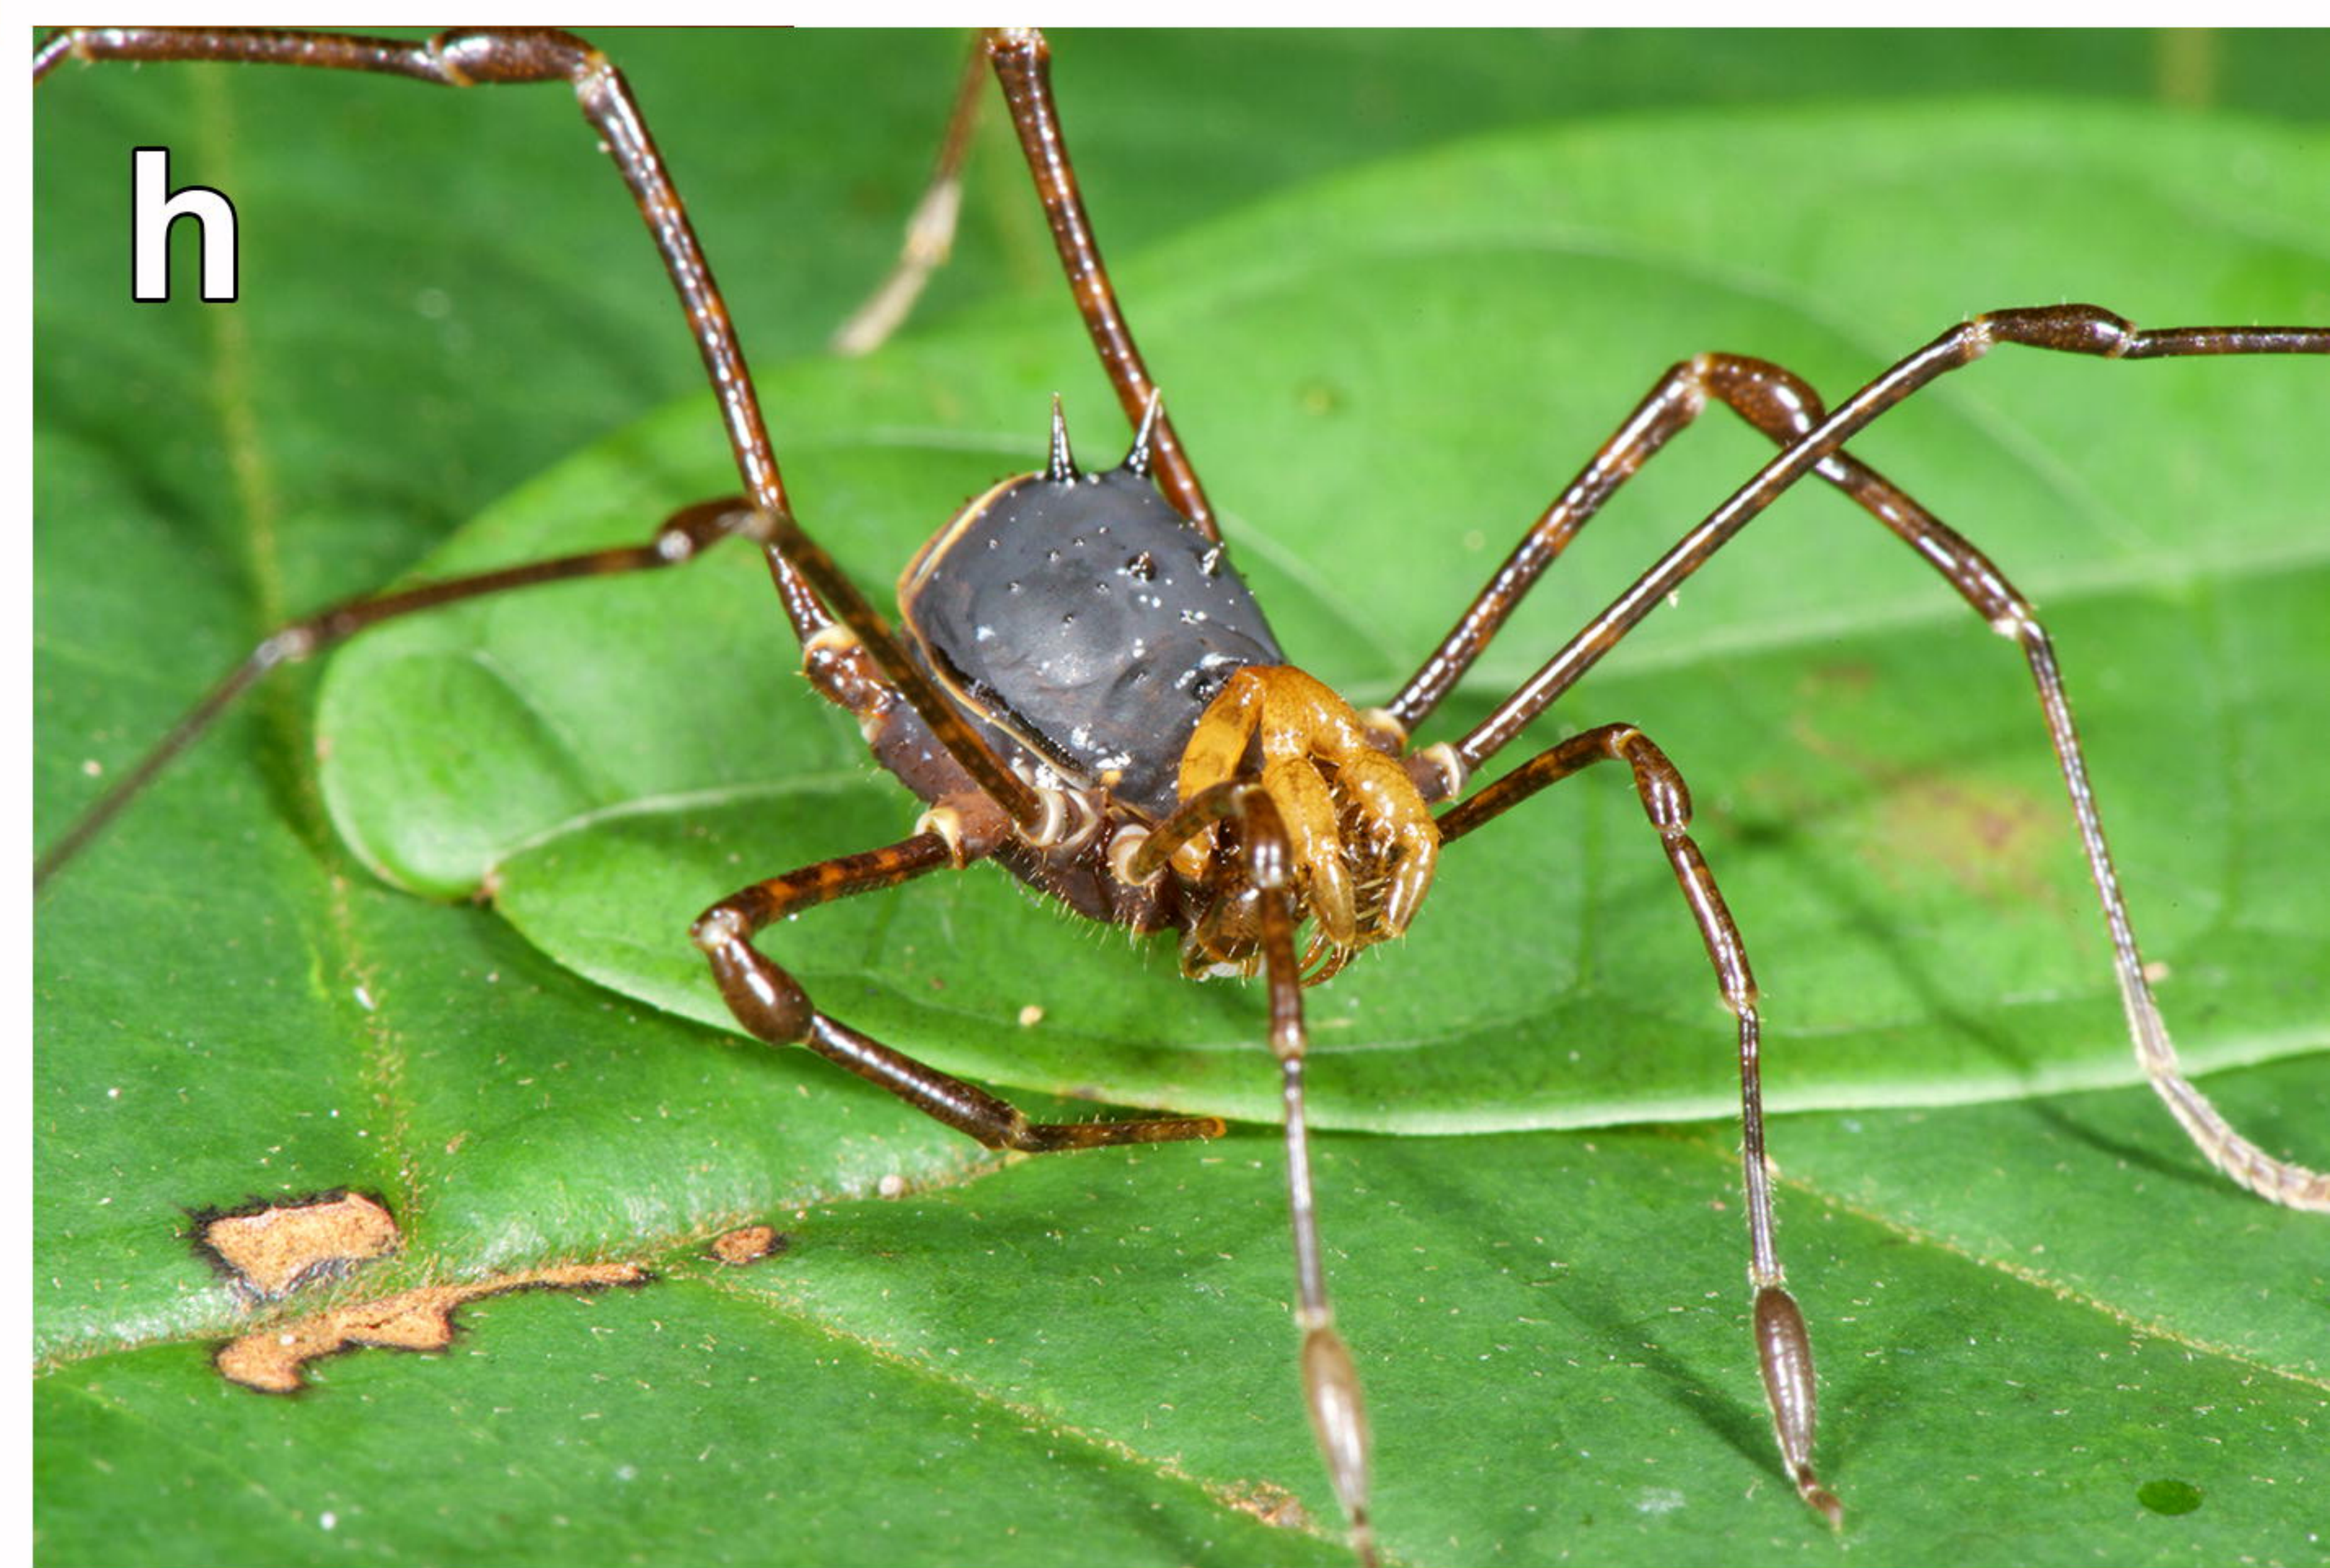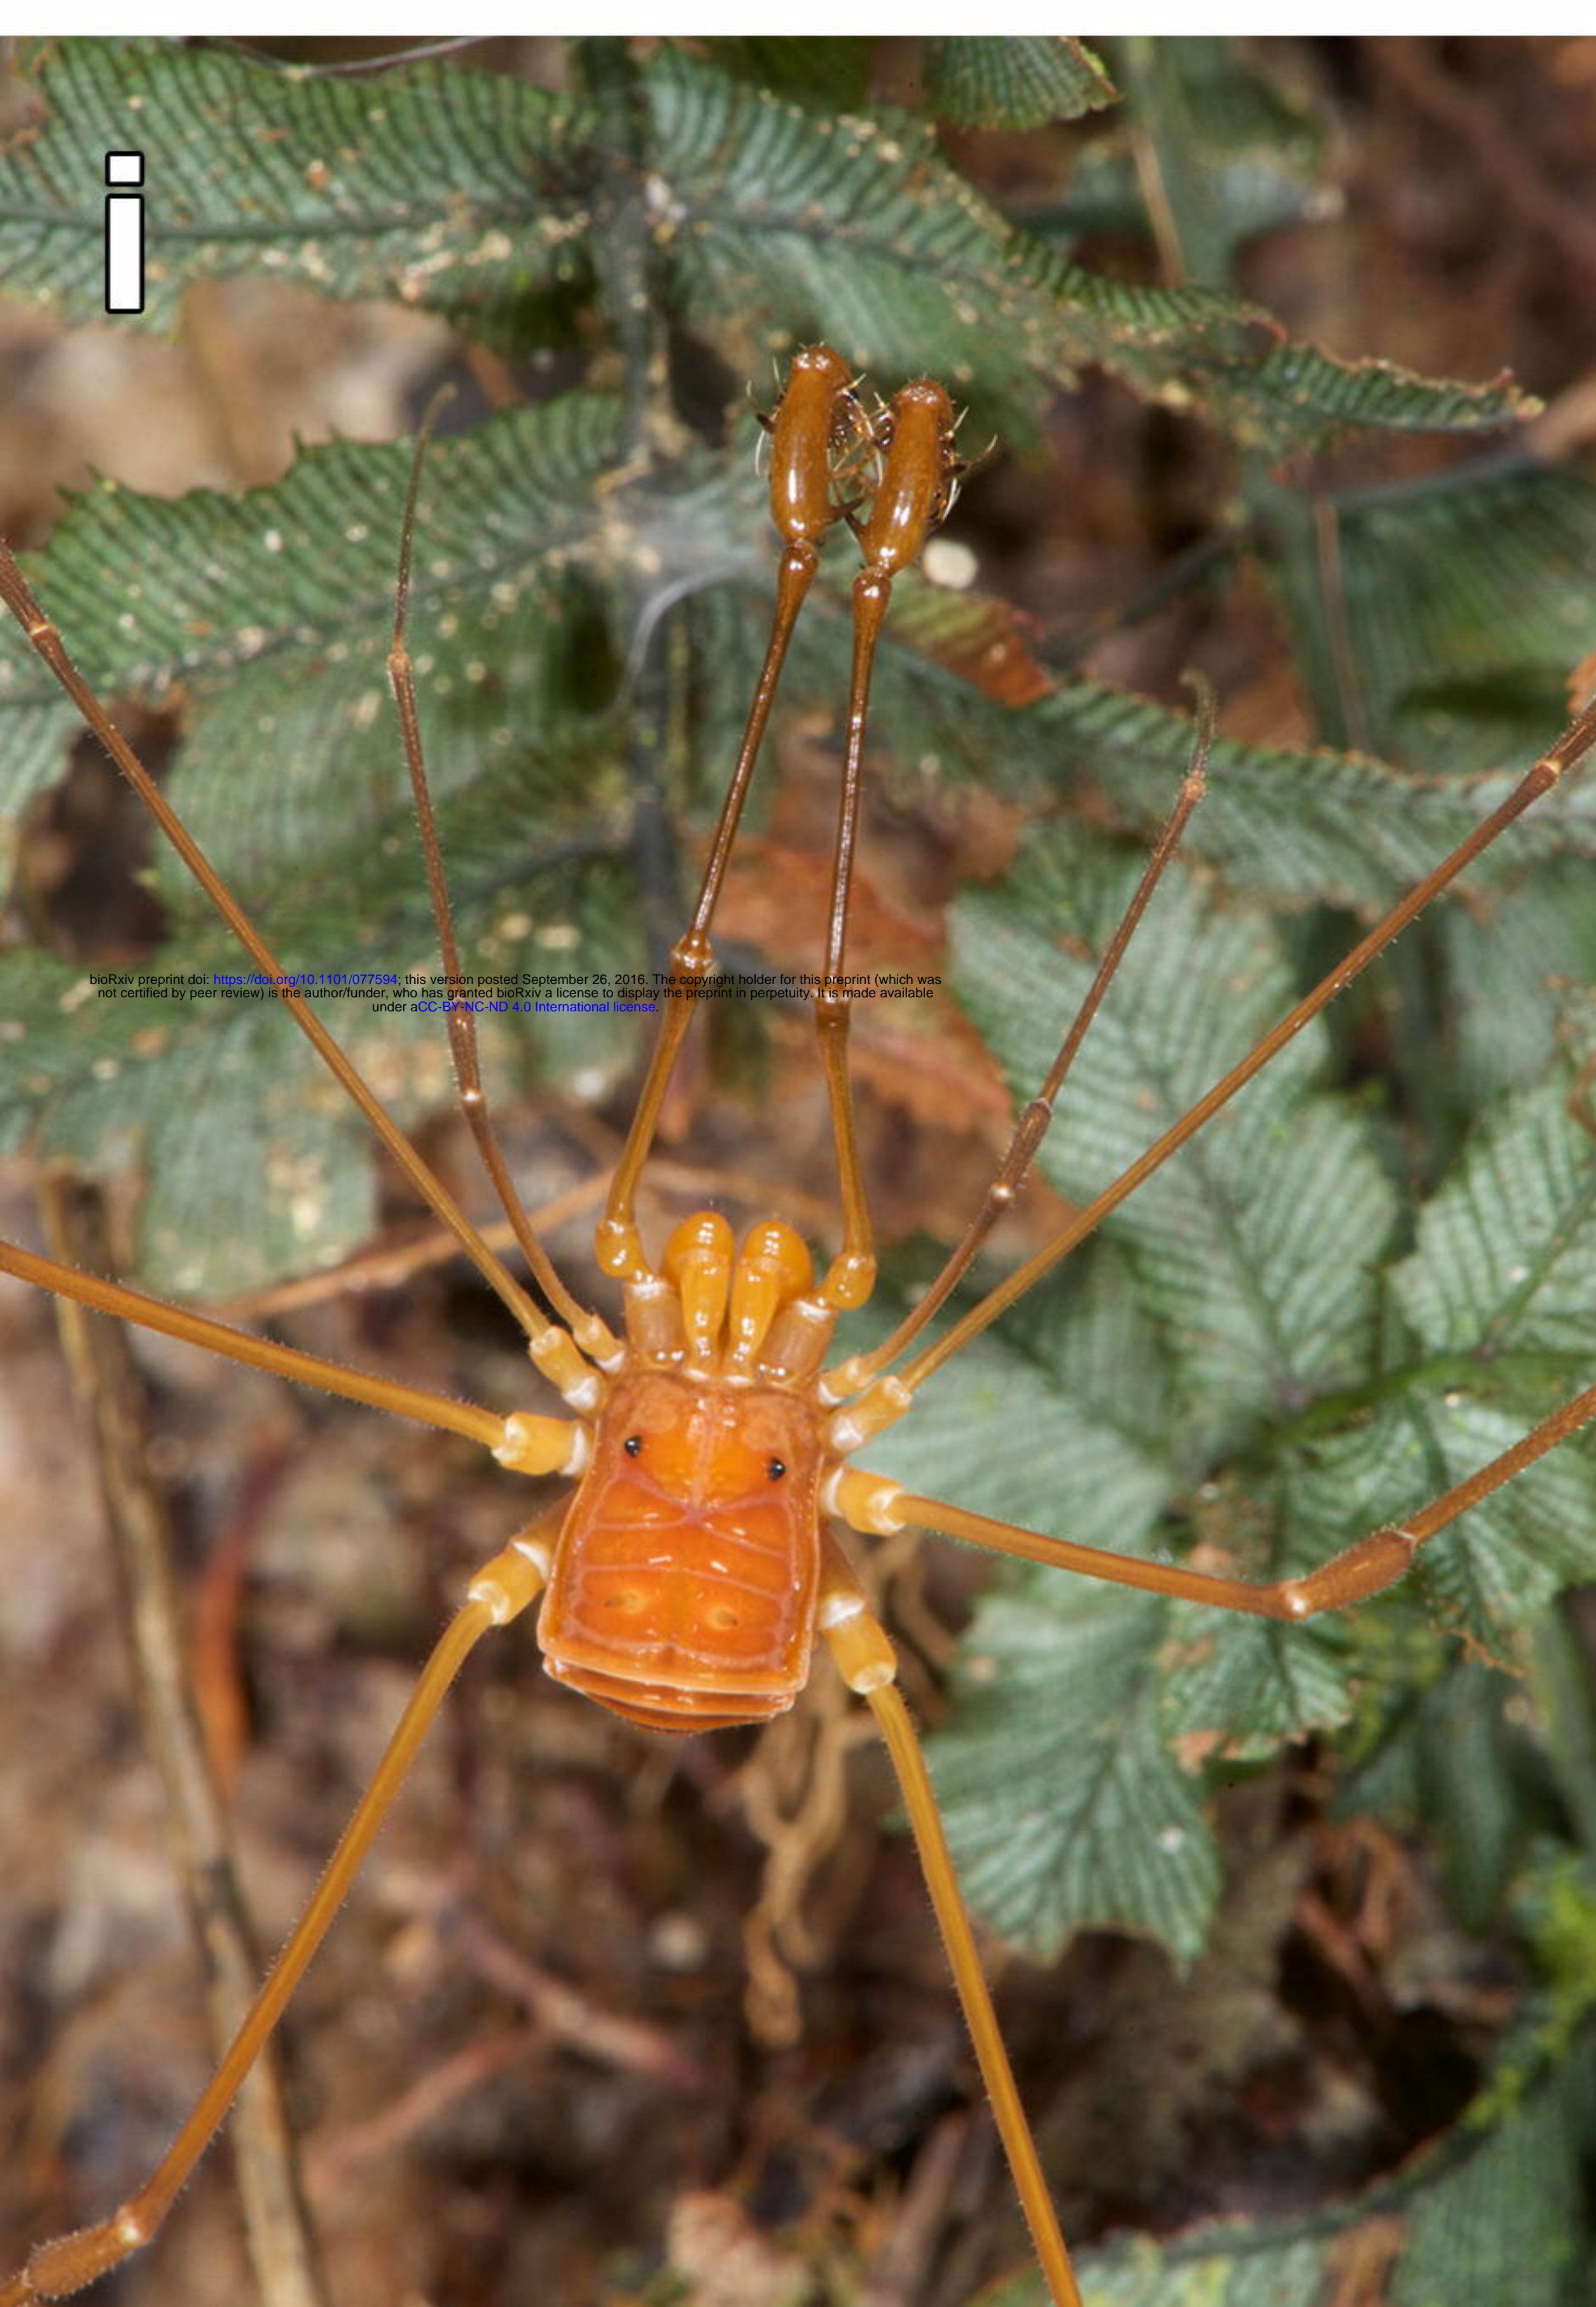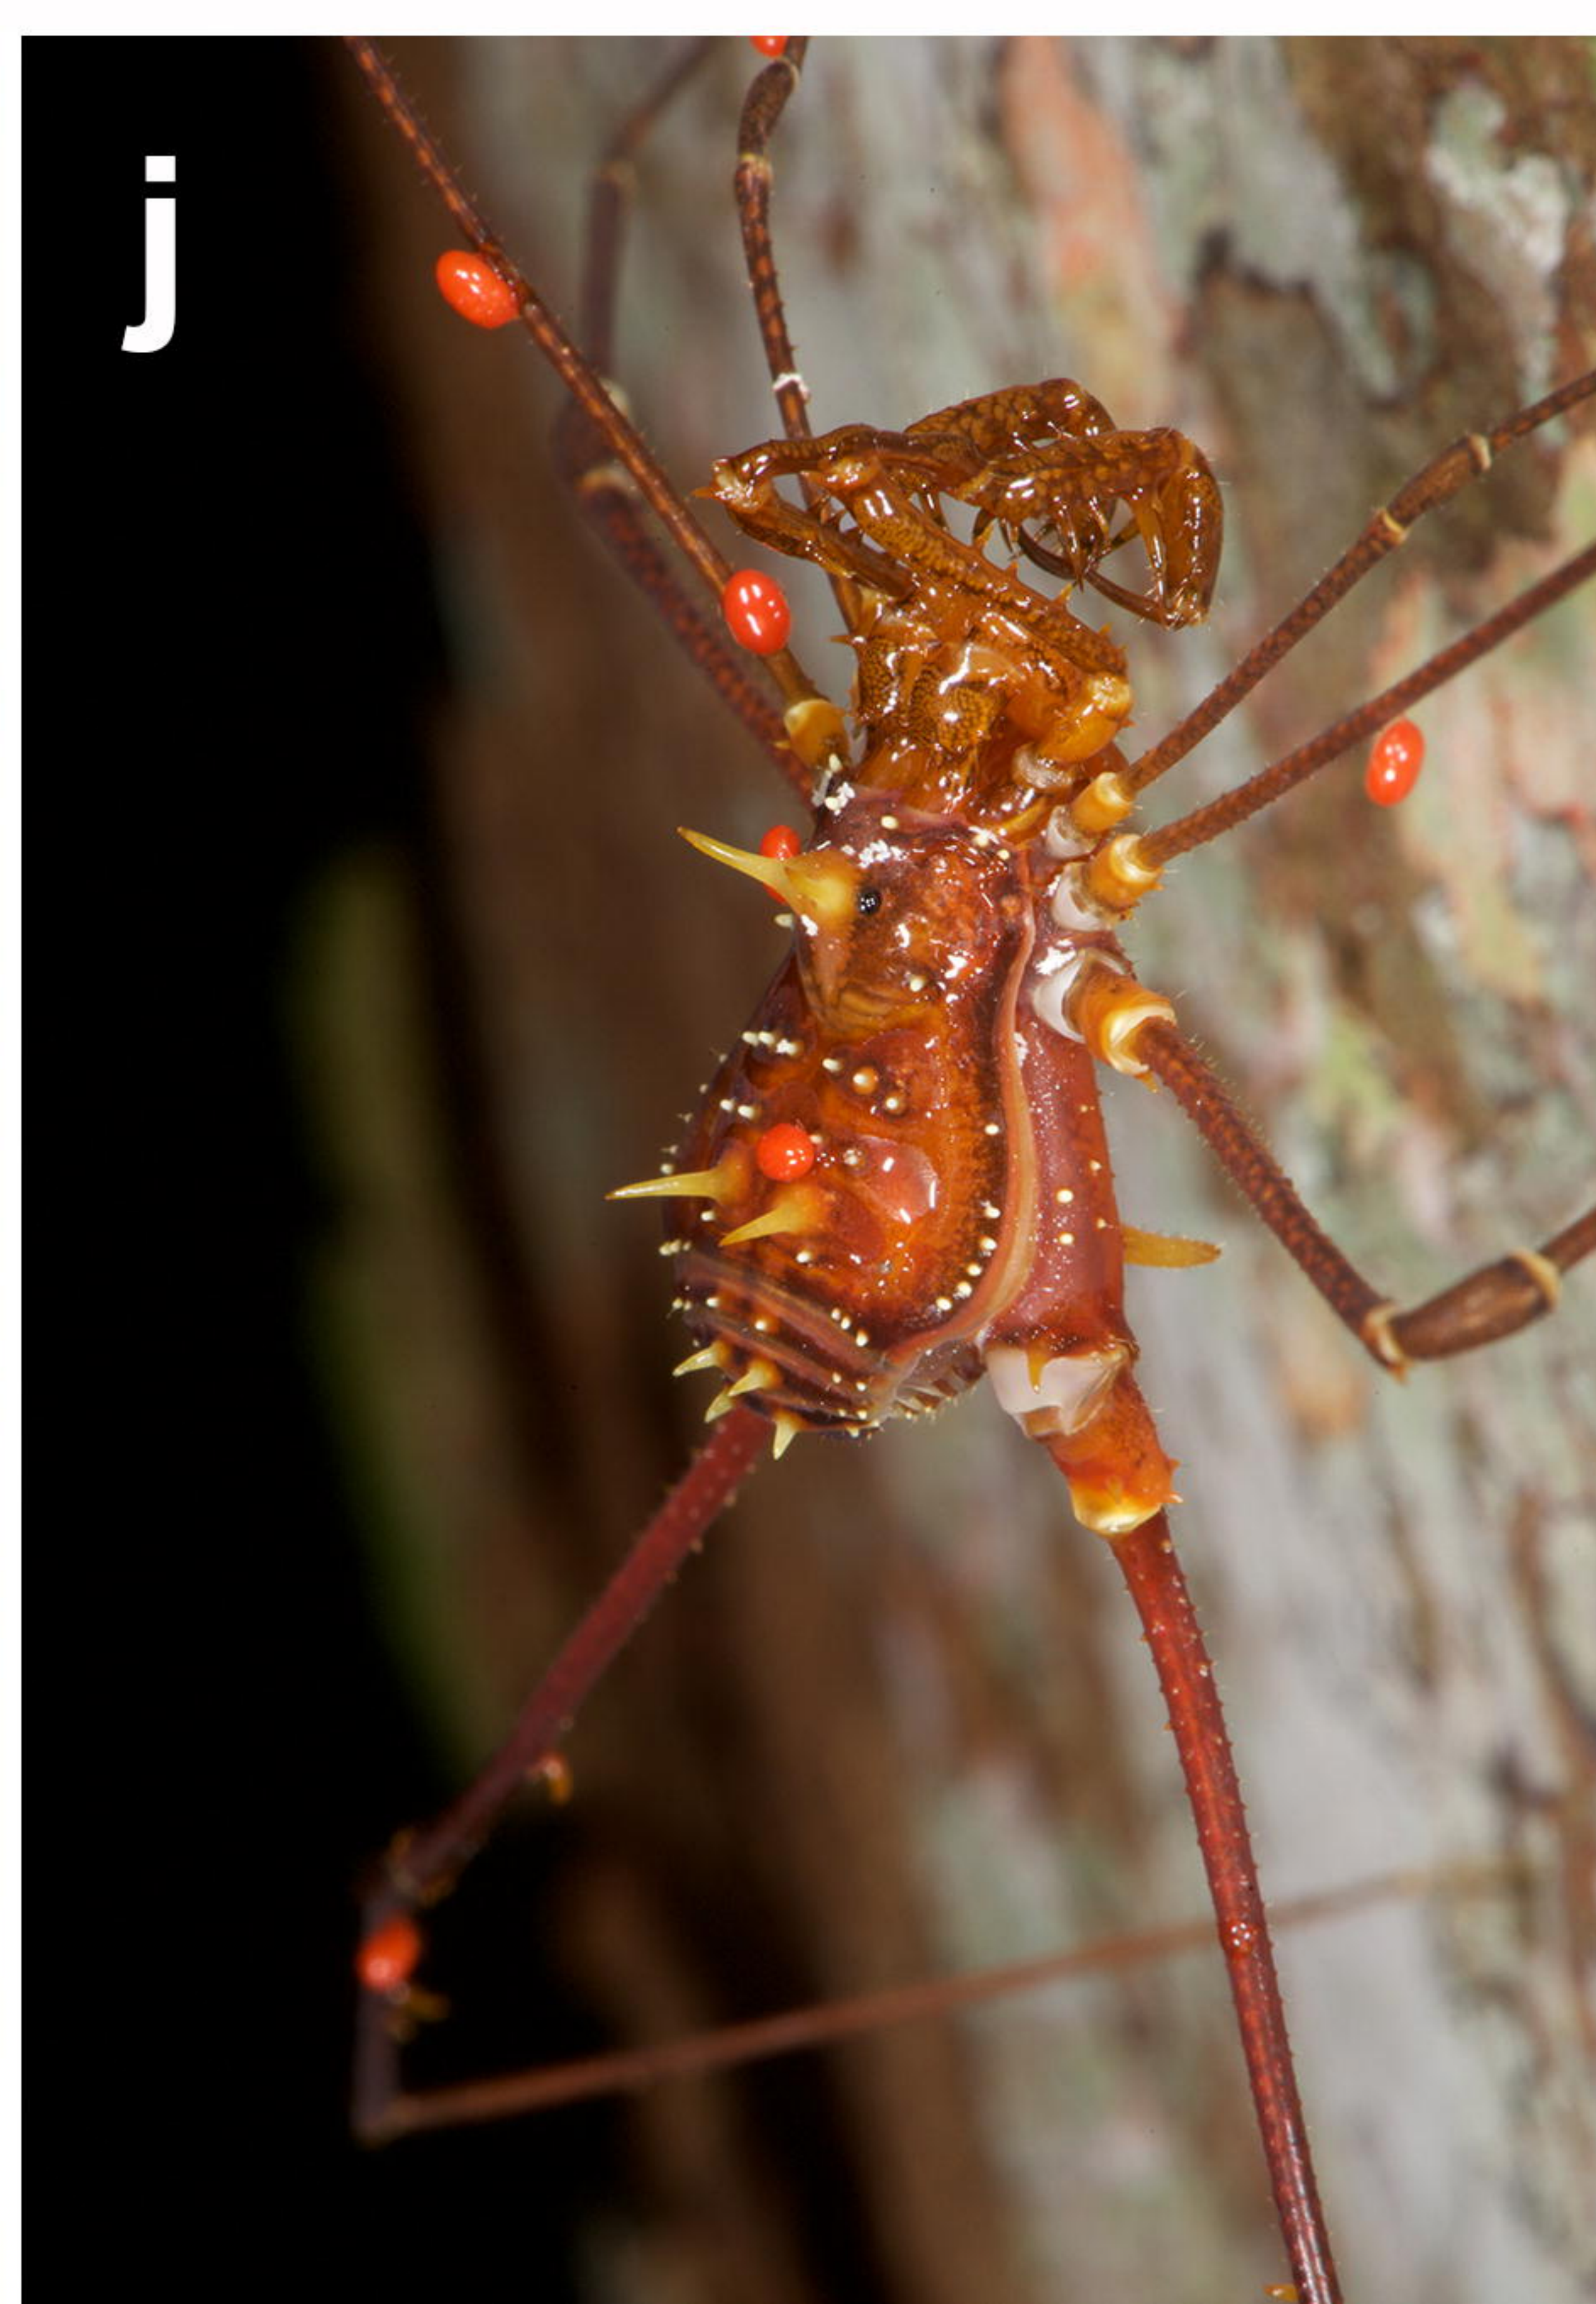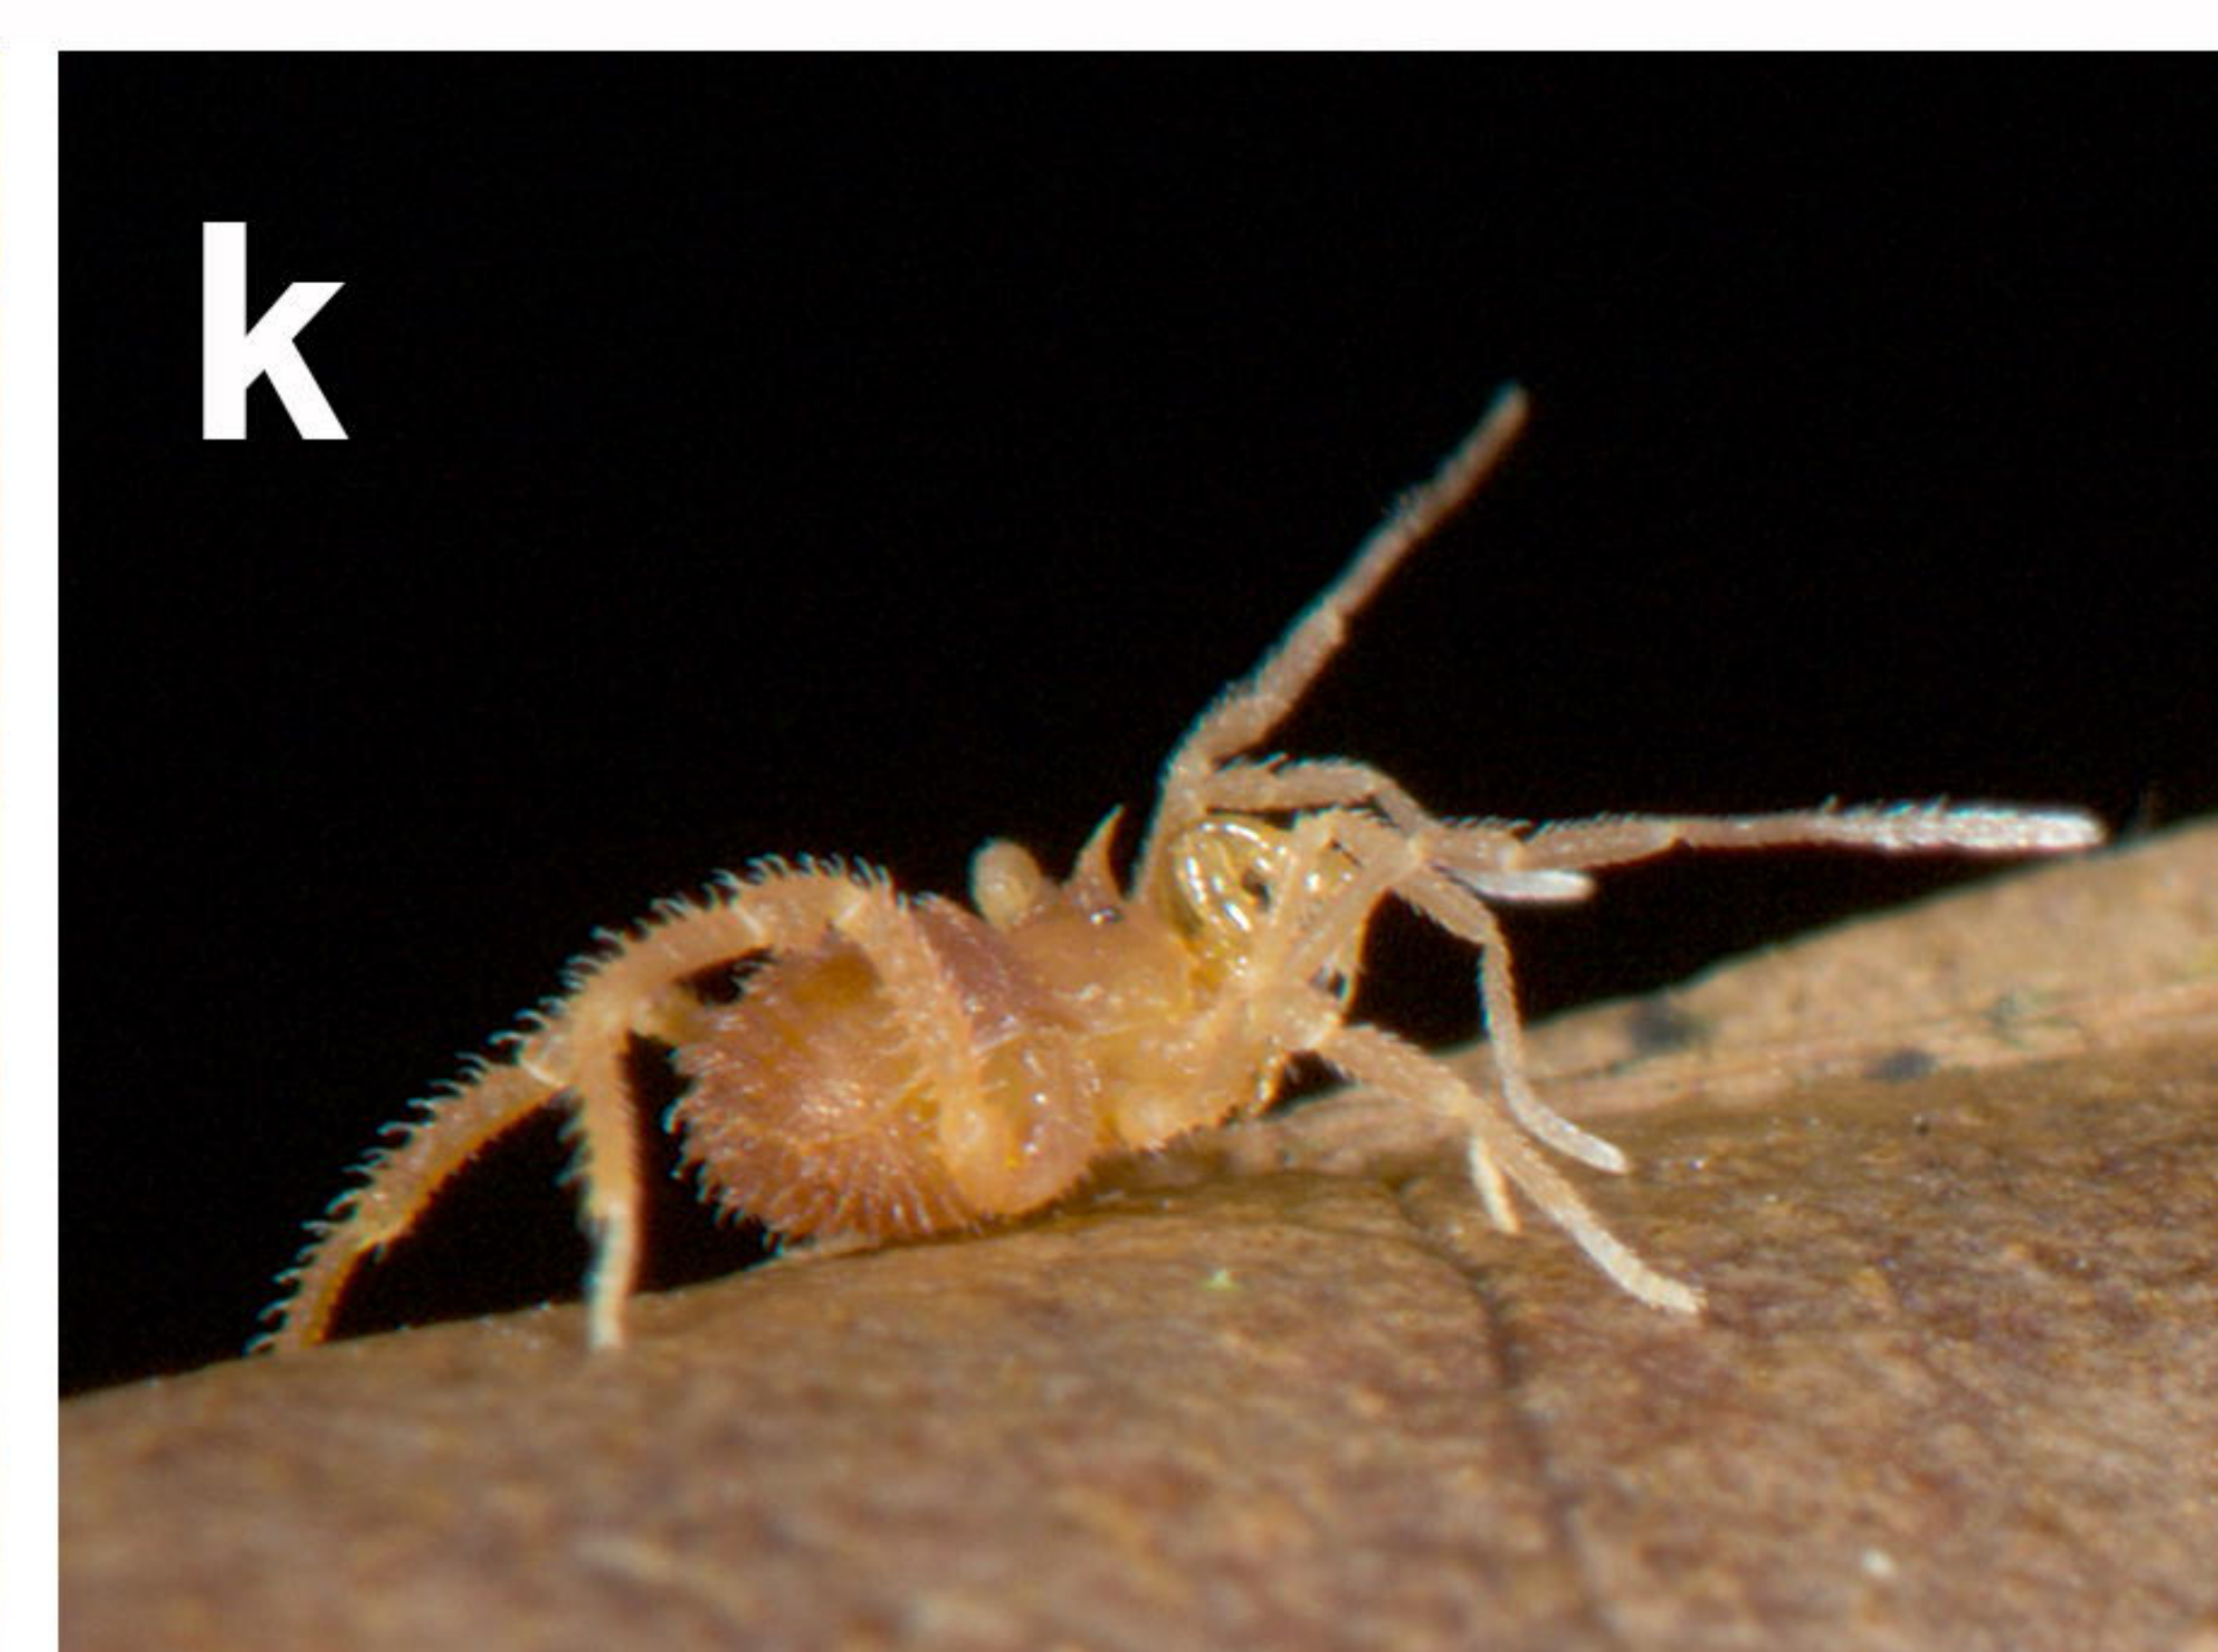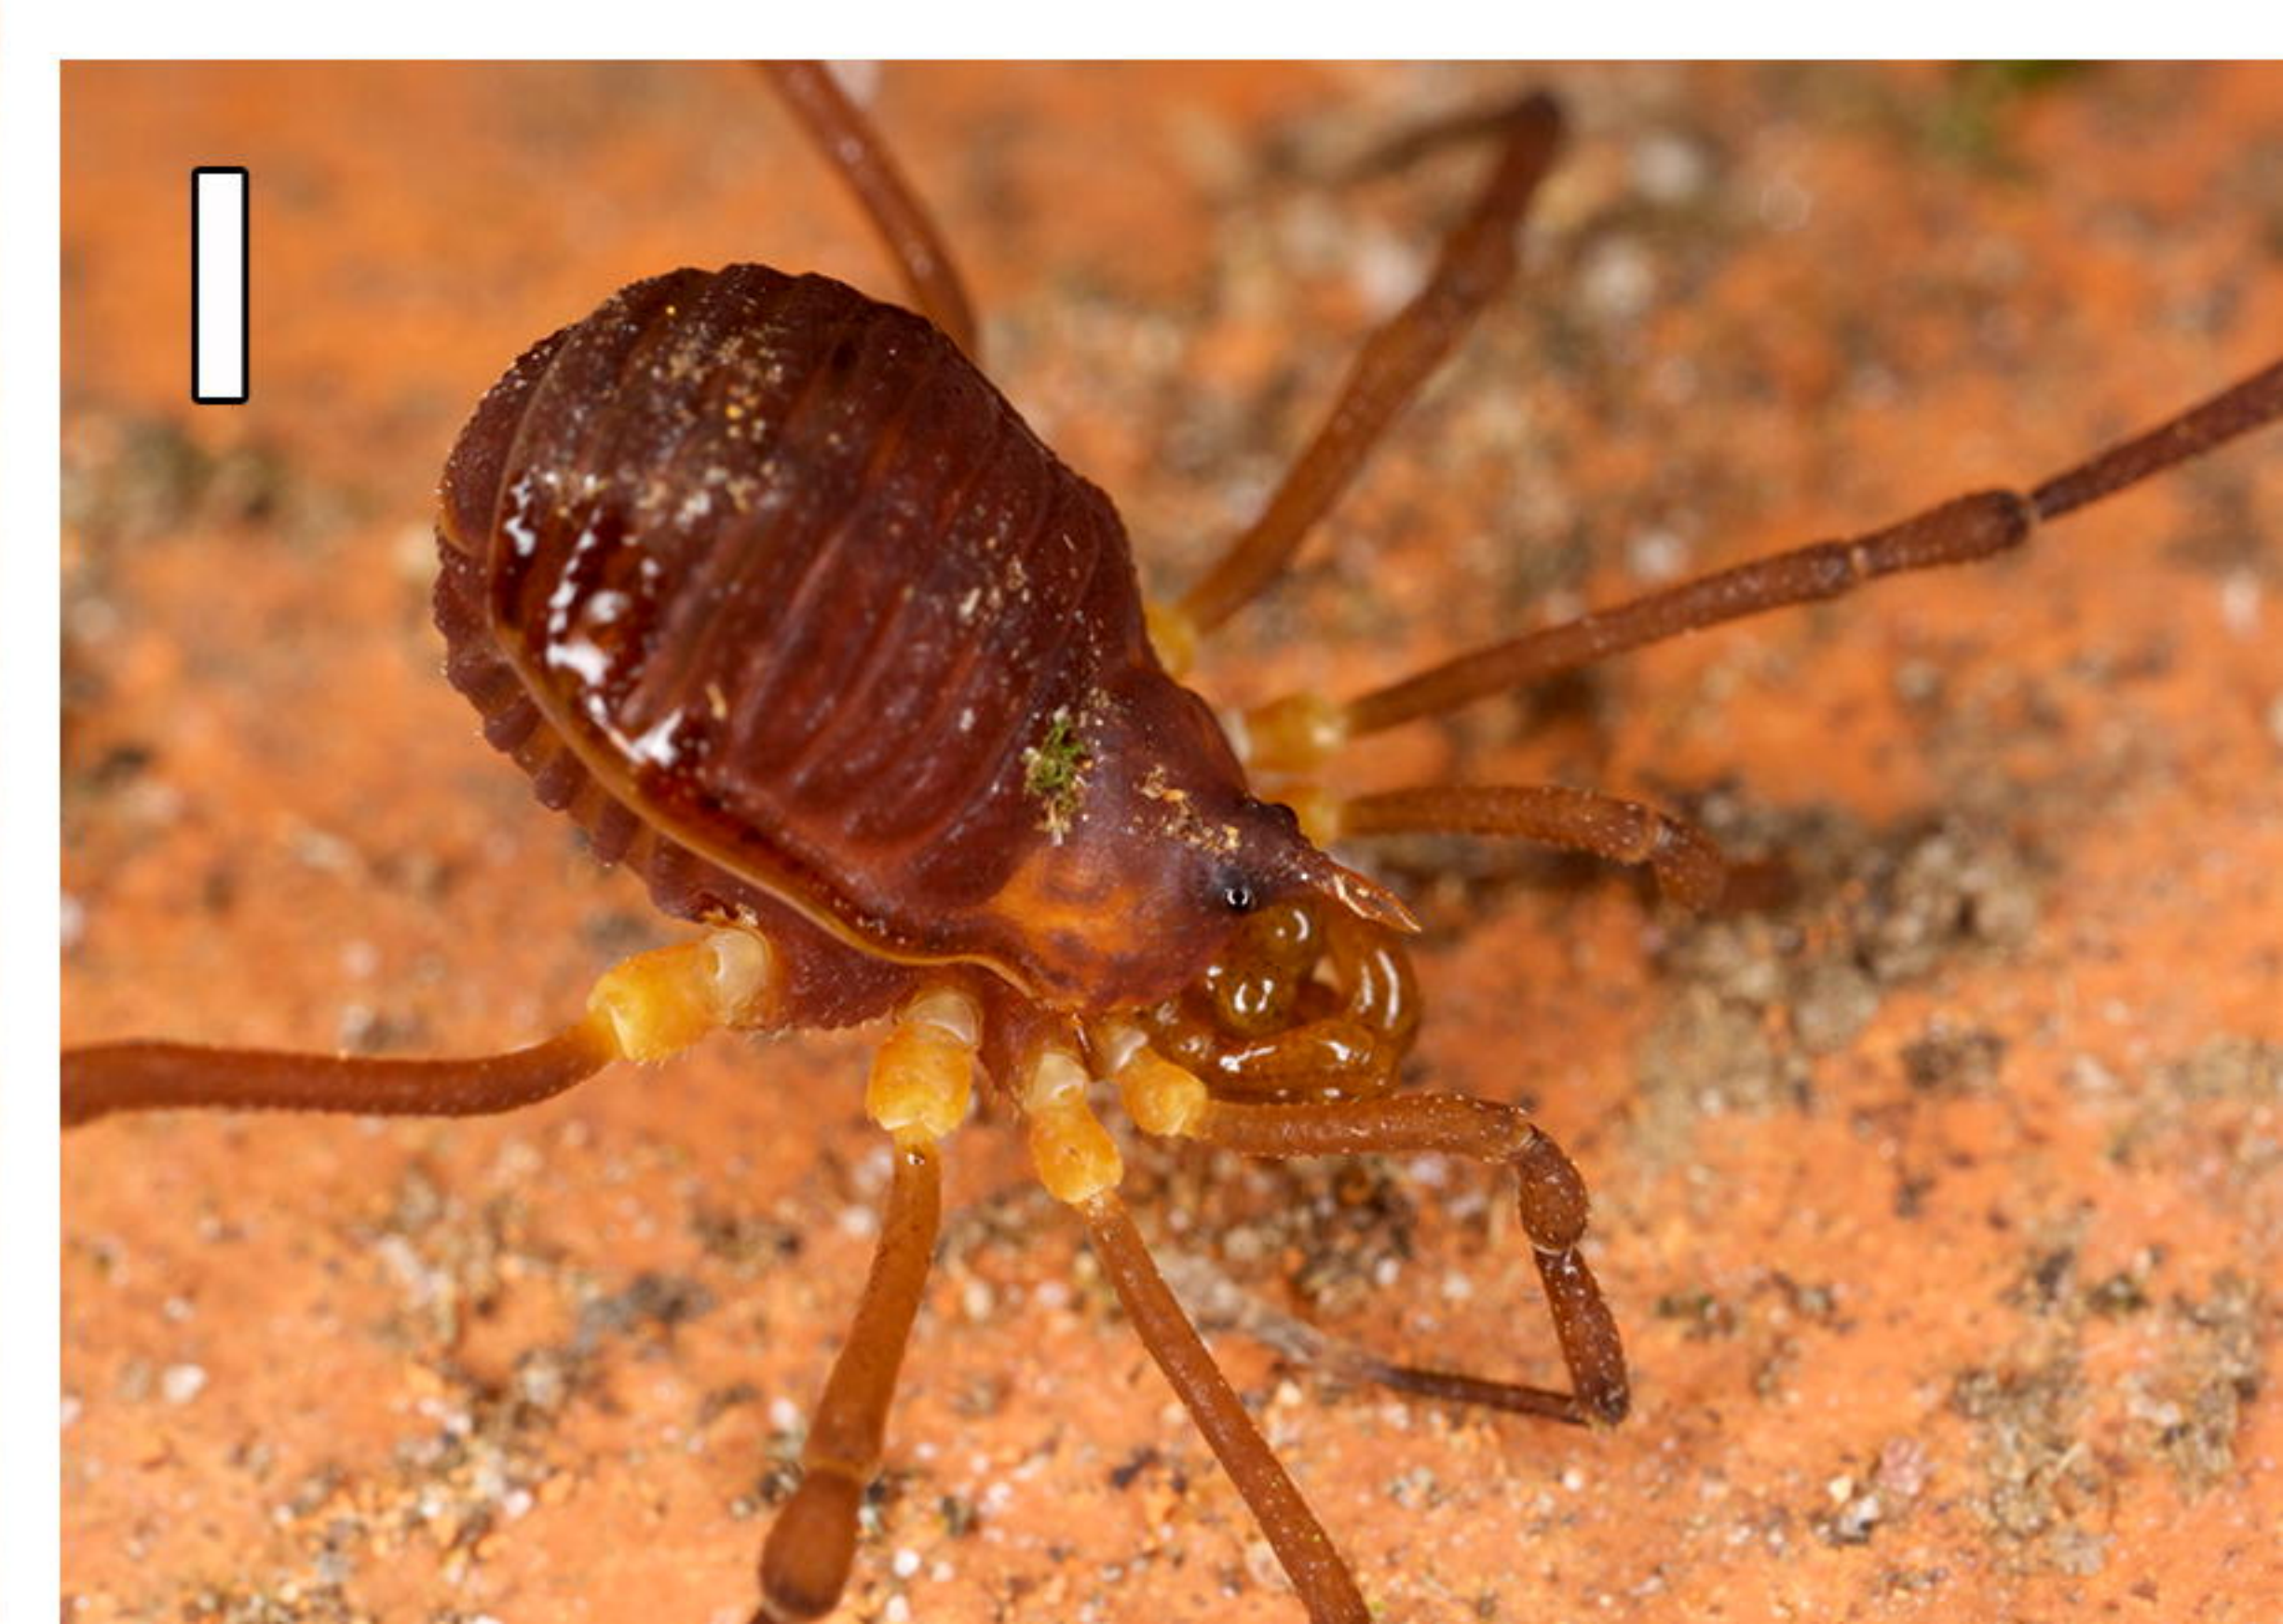



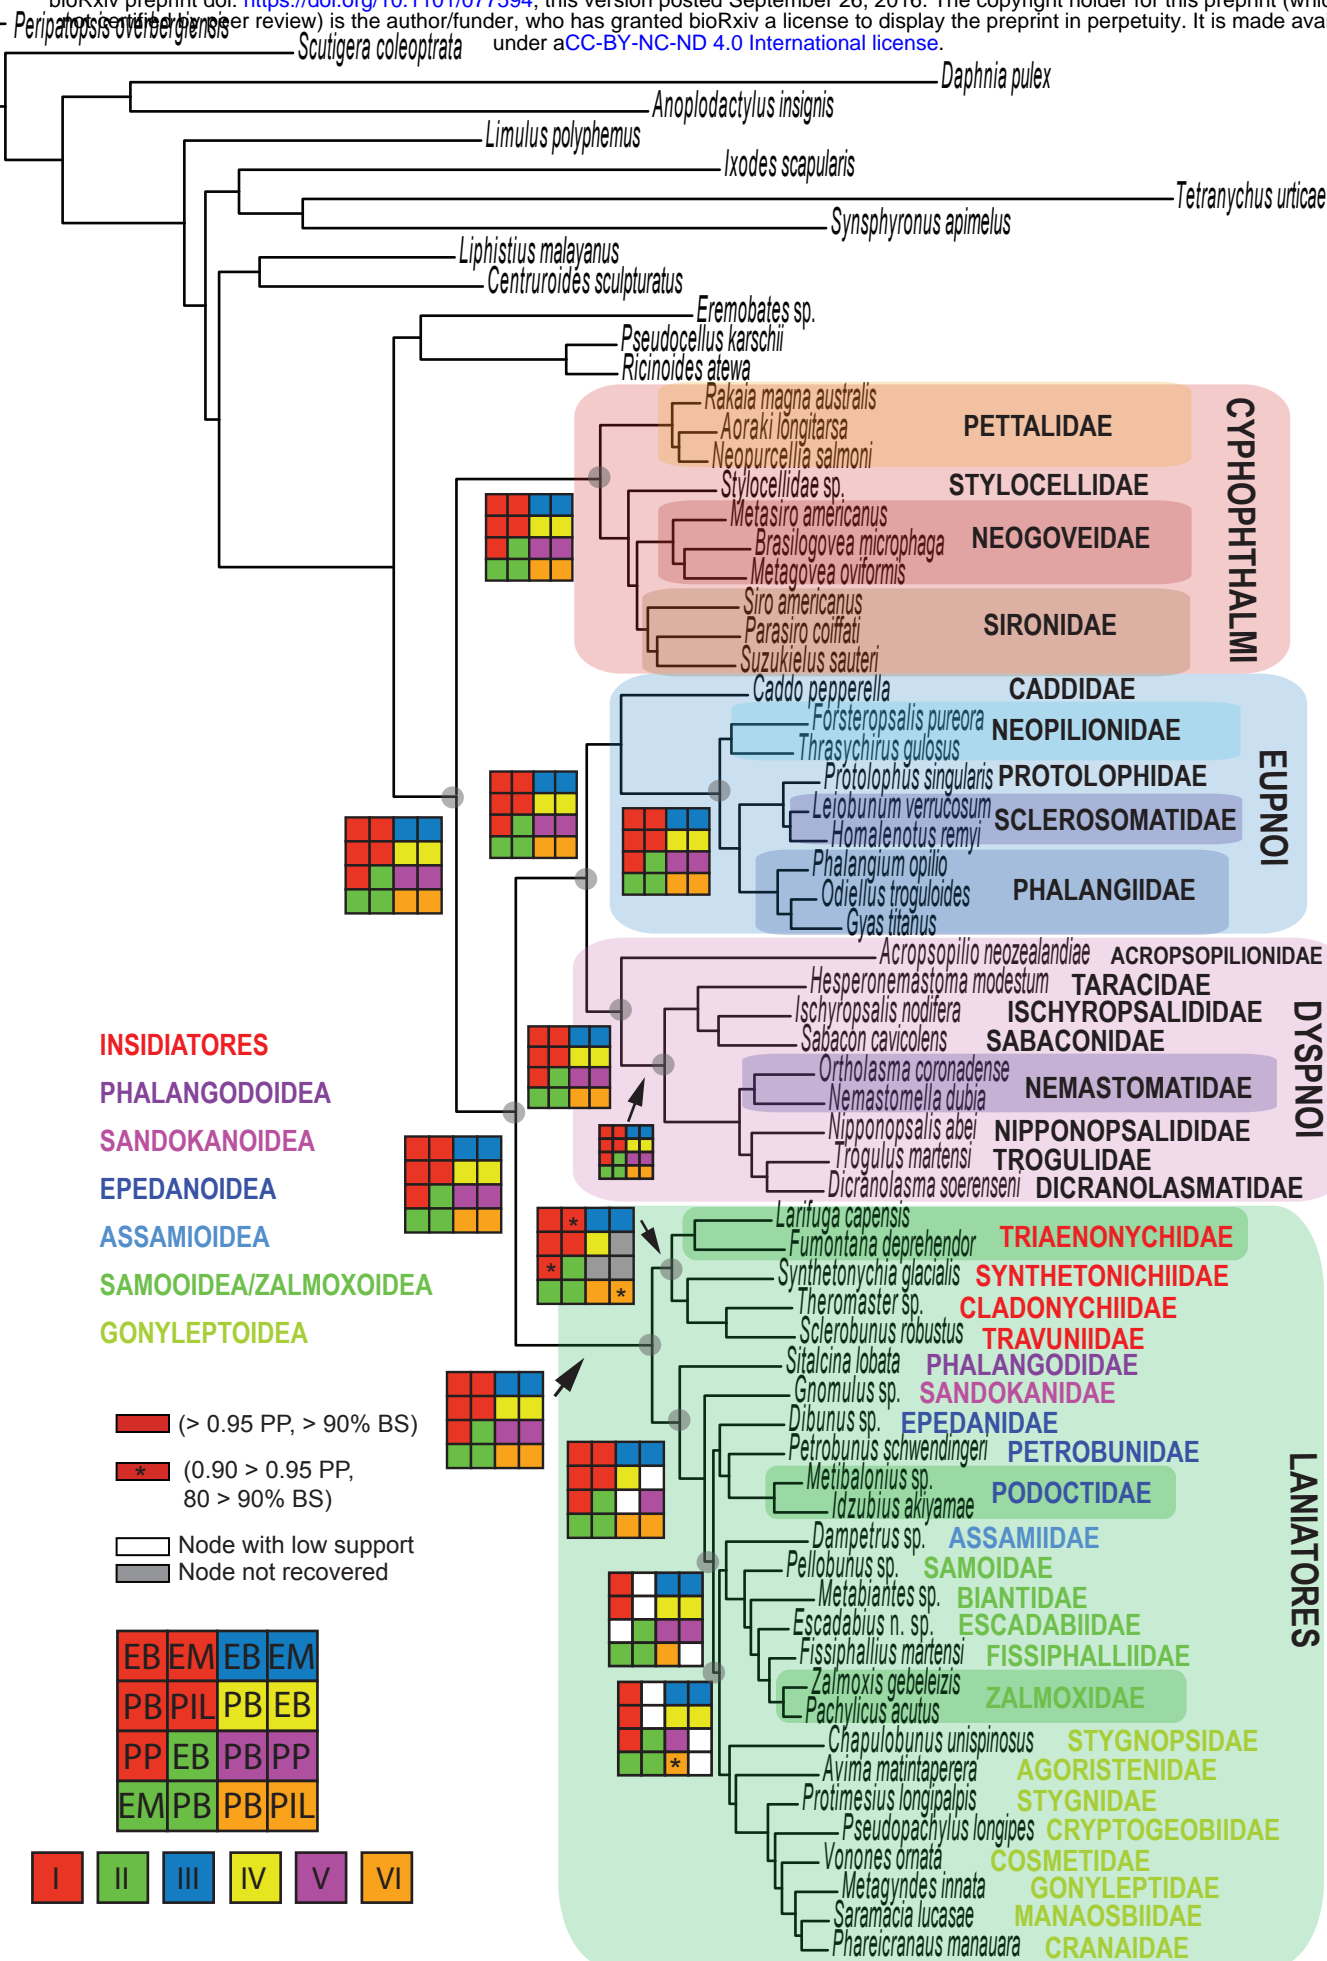

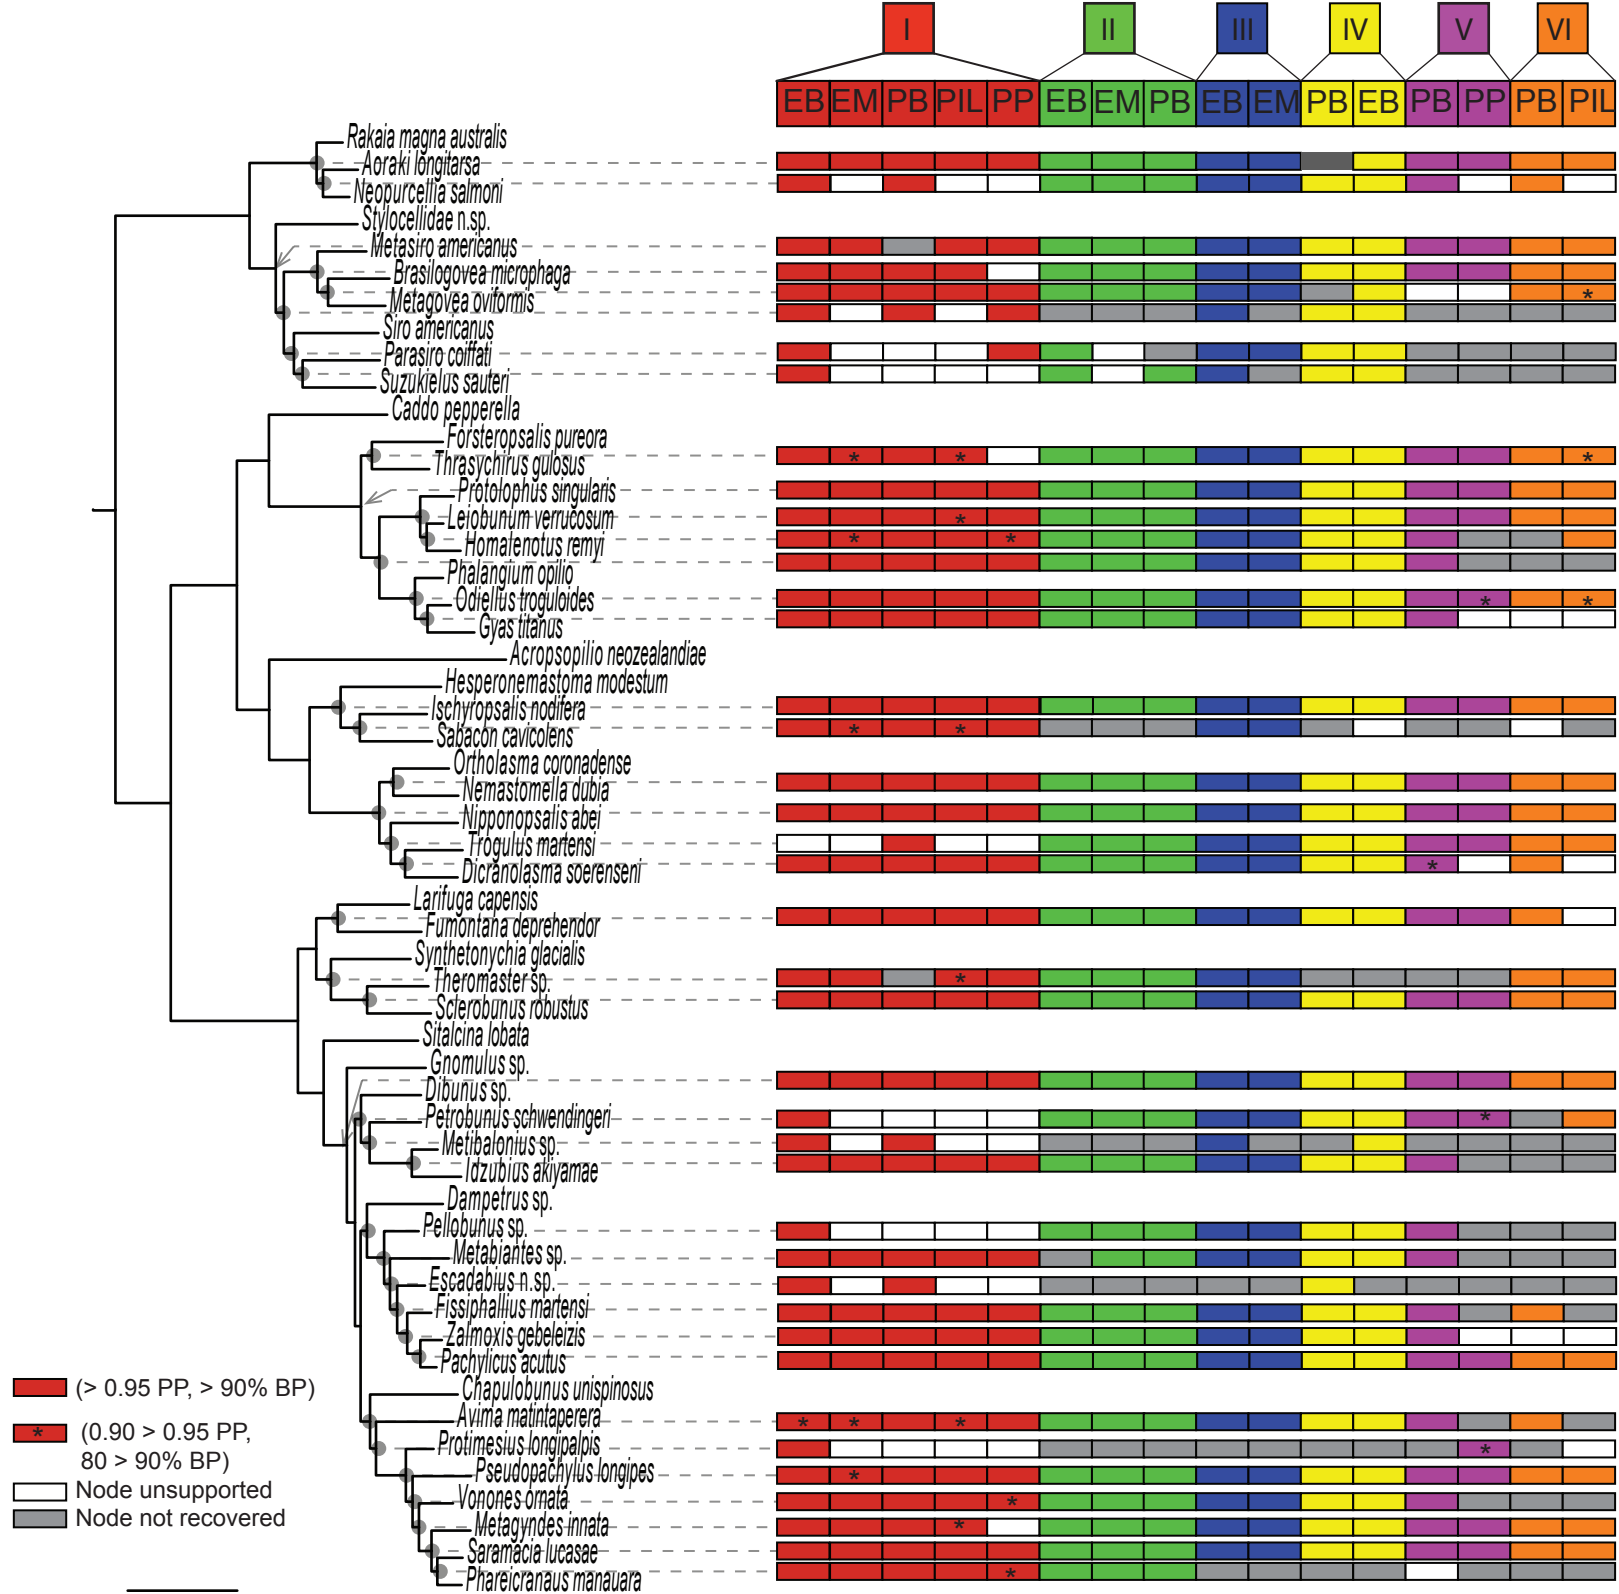

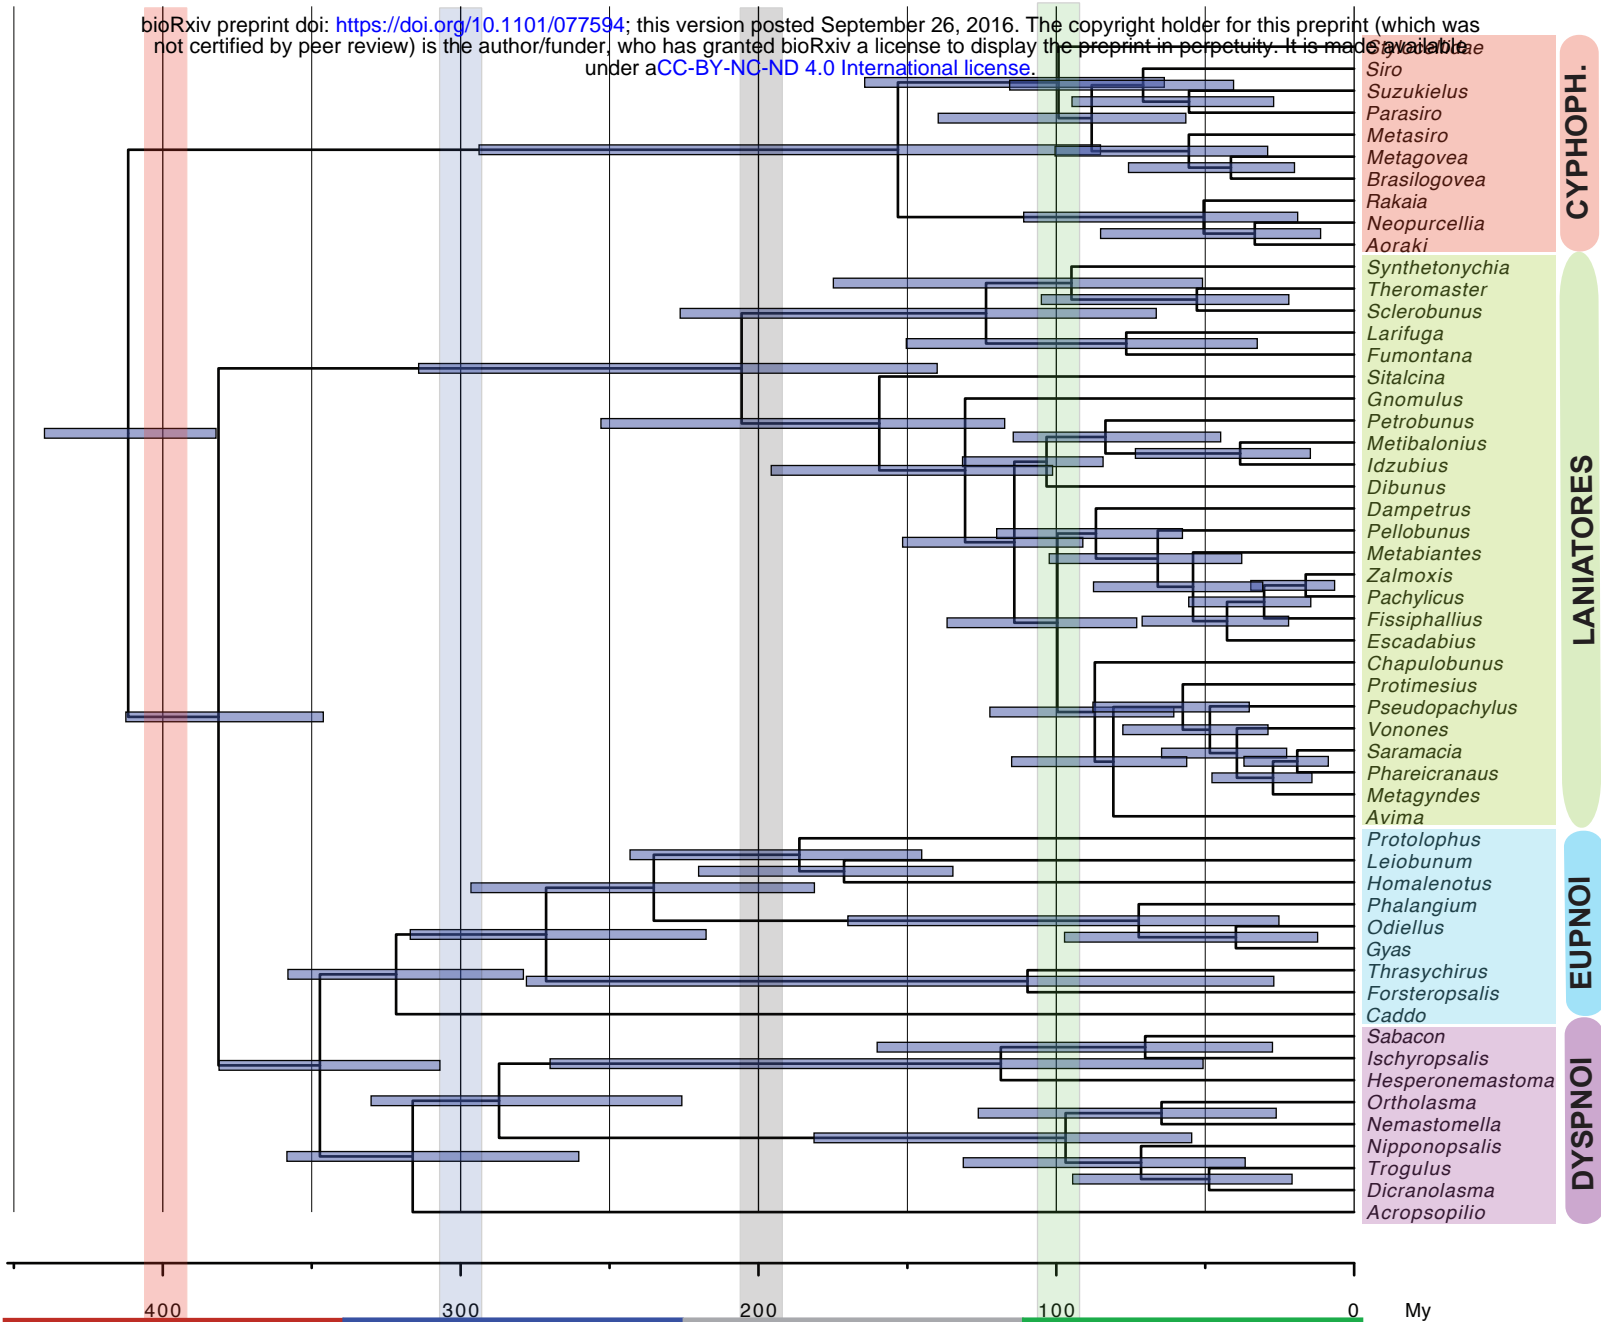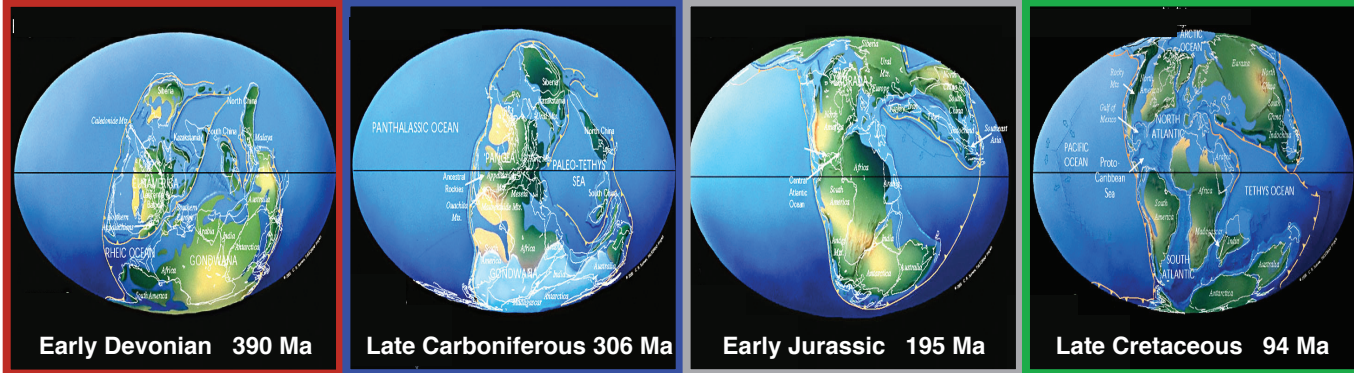

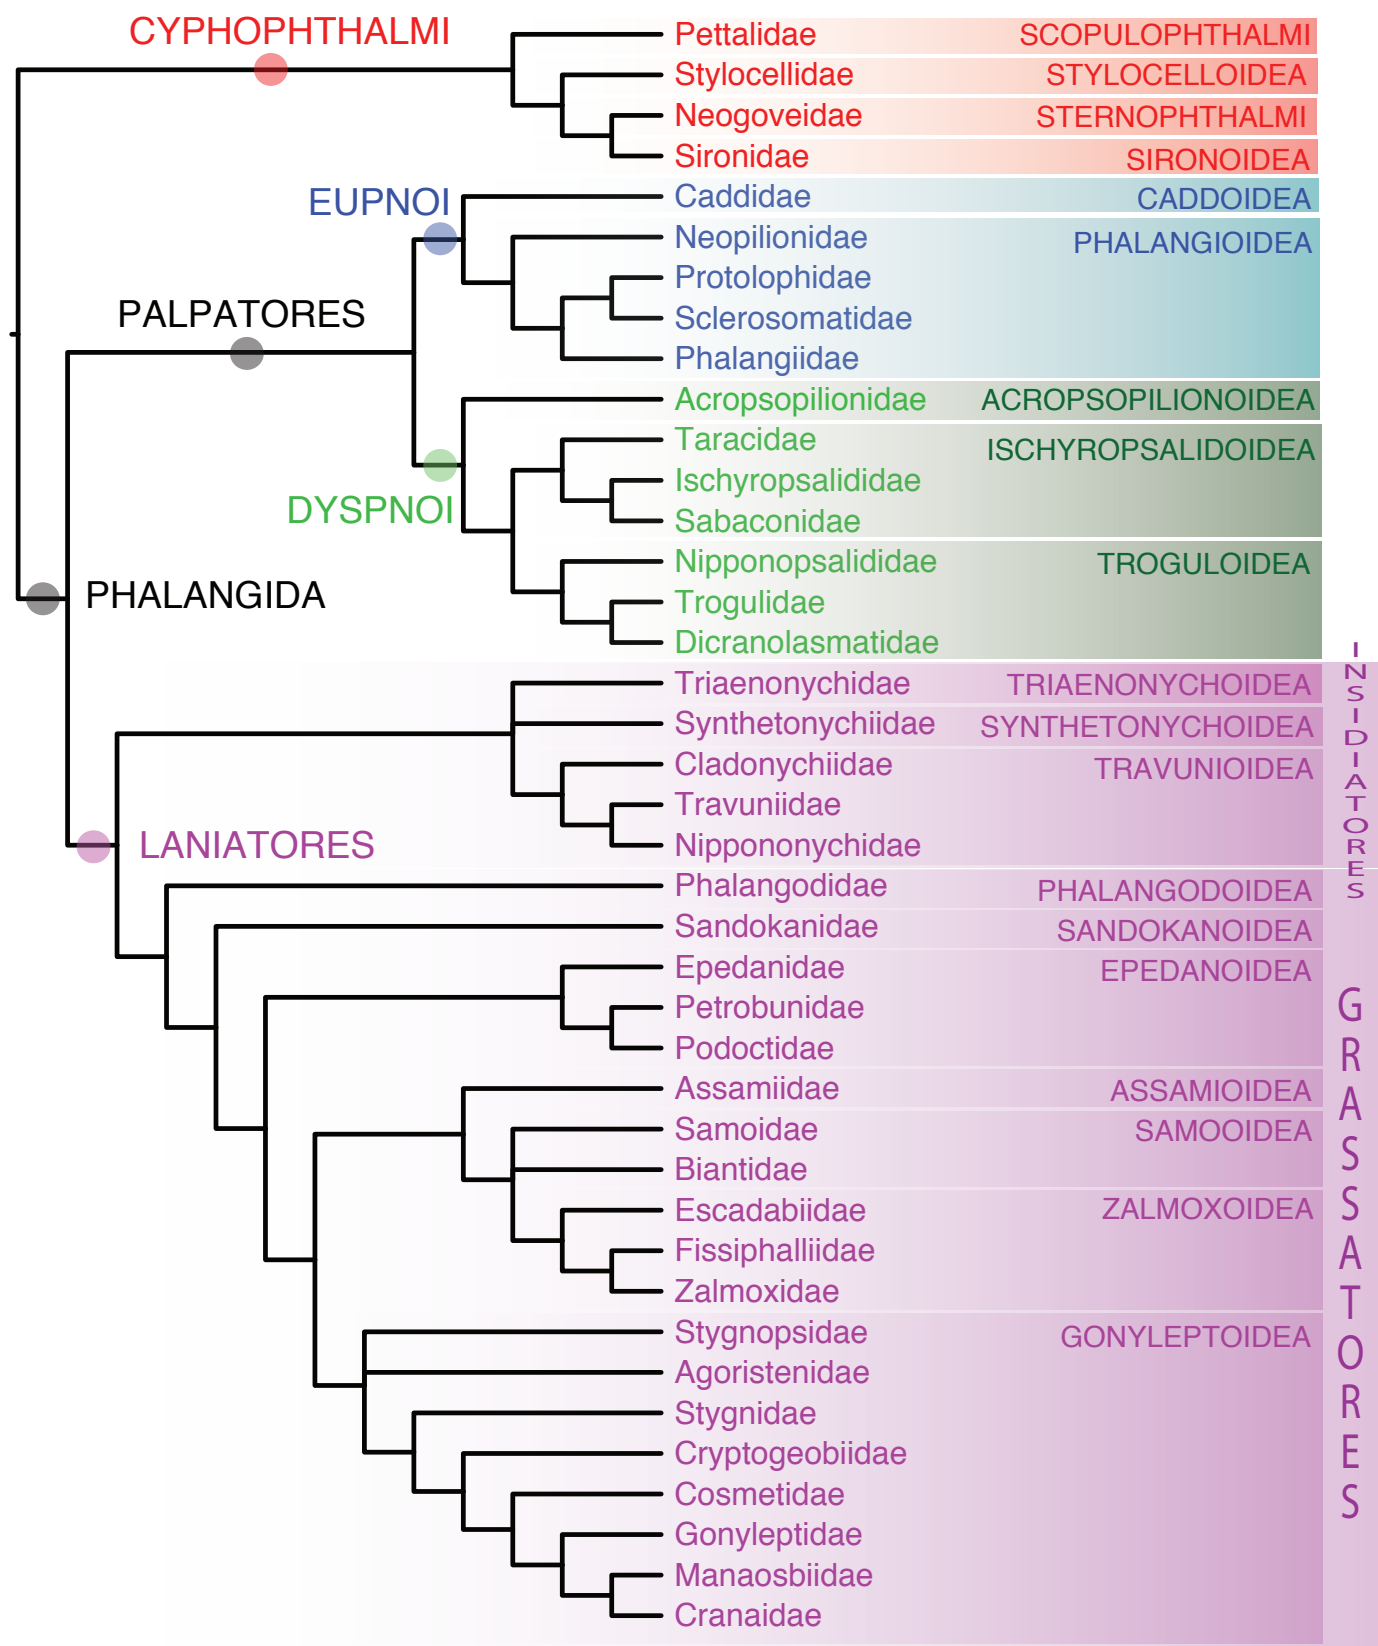

|                         | Family                        | Species                           | MCZ Accession # |                                                                                                                   |
|-------------------------|-------------------------------|-----------------------------------|-----------------|-------------------------------------------------------------------------------------------------------------------|
| <b>OPILIONES</b>        |                               |                                   |                 |                                                                                                                   |
| Cyphophthalmi           | Pettalidae                    | <i>Aoraki longitarsa</i>          | IZ-137238       | <a href="http://mczbase.mcz.harvard.edu/guid/MCZ:IZ:137238">http://mczbase.mcz.harvard.edu/guid/MCZ:IZ:137238</a> |
|                         | Pettalidae                    | <i>Neopurcellia salmoni</i>       | IZ-29310        | <a href="http://mczbase.mcz.harvard.edu/guid/MCZ:IZ:29310">http://mczbase.mcz.harvard.edu/guid/MCZ:IZ:29310</a>   |
|                         | Pettalidae                    | <i>Rakaia magna australis</i>     | IZ-29212        | <a href="http://mczbase.mcz.harvard.edu/guid/MCZ:IZ:29212">http://mczbase.mcz.harvard.edu/guid/MCZ:IZ:29212</a>   |
|                         | Neogoveidae                   | <i>Brasilogovea microphaga</i>    | IZ-136559       | <a href="http://mczbase.mcz.harvard.edu/guid/MCZ:IZ:136559">http://mczbase.mcz.harvard.edu/guid/MCZ:IZ:136559</a> |
|                         | Neogoveidae                   | <i>Metagovea oviformis</i>        | IZ-136533       | <a href="http://mczbase.mcz.harvard.edu/guid/MCZ:IZ:136533">http://mczbase.mcz.harvard.edu/guid/MCZ:IZ:136533</a> |
|                         | Neogoveidae                   | <i>Metasiro americanus</i>        |                 |                                                                                                                   |
|                         | Stylocellidae                 | <i>Stylocellidae</i> n.sp.        | ASSIGN          |                                                                                                                   |
|                         | Sironidae                     | <i>Parasiro coiffatti</i>         | IZ-43732        | <a href="http://mczbase.mcz.harvard.edu/guid/MCZ:IZ:43732">http://mczbase.mcz.harvard.edu/guid/MCZ:IZ:43732</a>   |
|                         | Sironidae                     | <i>Siro boyerae</i>               | --              | --                                                                                                                |
|                         | Sironidae                     | <i>Suzukielus sauteri</i>         | IZ-132257       | <a href="http://mczbase.mcz.harvard.edu/guid/MCZ:IZ:132257">http://mczbase.mcz.harvard.edu/guid/MCZ:IZ:132257</a> |
| Eupnoi                  | Caddidae                      | <i>Caddo pepperella</i>           | IZ-40441        | <a href="http://mczbase.mcz.harvard.edu/guid/MCZ:IZ:40441">http://mczbase.mcz.harvard.edu/guid/MCZ:IZ:40441</a>   |
|                         | Neopilionidae                 | <i>Forsteropsalis pureora</i>     | ASSIGN          |                                                                                                                   |
|                         | Neopilionidae                 | <i>Thrasychirus gulosus</i>       | ASSIGN          |                                                                                                                   |
|                         | Phalangidae                   | <i>Odiellus troglodites</i>       | IZ-43723        | <a href="http://mczbase.mcz.harvard.edu/guid/MCZ:IZ:43723">http://mczbase.mcz.harvard.edu/guid/MCZ:IZ:43723</a>   |
|                         | Phalangidae                   | <i>Phalangium opilio</i>          | IZ-29189        | <a href="http://mczbase.mcz.harvard.edu/guid/MCZ:IZ:29189">http://mczbase.mcz.harvard.edu/guid/MCZ:IZ:29189</a>   |
|                         | Protolophidae                 | <i>Protolophus singularis</i>     | --              |                                                                                                                   |
|                         | Sclerosomatidae               | <i>Gyas titanus</i>               | IZ-45502        | <a href="http://mczbase.mcz.harvard.edu/guid/MCZ:IZ:45502">http://mczbase.mcz.harvard.edu/guid/MCZ:IZ:45502</a>   |
|                         | Sclerosomatidae               | <i>Homalenotus remyi</i>          | IZ-43715        | <a href="http://mczbase.mcz.harvard.edu/guid/MCZ:IZ:43715">http://mczbase.mcz.harvard.edu/guid/MCZ:IZ:43715</a>   |
|                         | Sclerosomatidae               | <i>Leiobunum verrucosum</i>       | --              |                                                                                                                   |
|                         |                               |                                   |                 |                                                                                                                   |
| Dyspnoi                 | Acropsopilionidae             | <i>Acropsopilio neozealandiae</i> | IZ-30457        | <a href="http://mczbase.mcz.harvard.edu/guid/MCZ:IZ:30457">http://mczbase.mcz.harvard.edu/guid/MCZ:IZ:30457</a>   |
|                         | Dicranolasmatidae             | <i>Dicranolasma soerenseni</i>    | IZ-43680        | <a href="http://mczbase.mcz.harvard.edu/guid/MCZ:IZ:43680">http://mczbase.mcz.harvard.edu/guid/MCZ:IZ:43680</a>   |
|                         | Ischyropsalidae               | <i>Ischyropsalis nodifera</i>     | IZ-45501        | <a href="http://mczbase.mcz.harvard.edu/guid/MCZ:IZ:45501">http://mczbase.mcz.harvard.edu/guid/MCZ:IZ:45501</a>   |
|                         | Nemastomatidae                | <i>Ortholasma coronadense</i>     | --              |                                                                                                                   |
|                         | Nemastomatidae                | <i>Nemastomella dubia</i>         | IZ-43619        |                                                                                                                   |
|                         | Nipponopsalidae               | <i>Nipponopsalis abei</i>         | IZ-45632        | <a href="http://mczbase.mcz.harvard.edu/guid/MCZ:IZ:45632">http://mczbase.mcz.harvard.edu/guid/MCZ:IZ:45632</a>   |
|                         | Sabaconidae                   | <i>Sabacon cavicolens</i>         | ASSIGN          |                                                                                                                   |
|                         | Taracidae                     | <i>Hesperonemastoma modestum</i>  | --              |                                                                                                                   |
|                         | Trogulidae                    | <i>Trogulus martensi</i>          | --              |                                                                                                                   |
|                         |                               |                                   |                 |                                                                                                                   |
| Laniatores/Insidiatores | Cladonychiidae                | <i>Theromaster</i> sp.            |                 |                                                                                                                   |
|                         | Synthetonychiidae             | <i>Synthetonychia glacialis</i>   | IZ-137212       | <a href="http://mczbase.mcz.harvard.edu/guid/MCZ:IZ:137212">http://mczbase.mcz.harvard.edu/guid/MCZ:IZ:137212</a> |
|                         | Travuniidae                   | <i>Sclerobunus robustus</i>       | --              |                                                                                                                   |
|                         | Trienonychidae                | <i>Larifuga capensis</i>          | IZ-49747        | <a href="http://mczbase.mcz.harvard.edu/guid/MCZ:IZ:49747">http://mczbase.mcz.harvard.edu/guid/MCZ:IZ:49747</a>   |
|                         | Trienonychidae                | <i>Fumontana deprehendor</i>      | IZ-46888        | <a href="http://mczbase.mcz.harvard.edu/guid/MCZ:IZ:46888">http://mczbase.mcz.harvard.edu/guid/MCZ:IZ:46888</a>   |
| Laniatores/Grassatores  | Agoristenidae                 | <i>Avima matintaperera</i>        | IZ-136560       | <a href="http://mczbase.mcz.harvard.edu/guid/MCZ:IZ:136560">http://mczbase.mcz.harvard.edu/guid/MCZ:IZ:136560</a> |
|                         | Assamiidae                    | <i>Dampetrus</i> sp.              |                 |                                                                                                                   |
|                         | Biantidae                     | <i>Metabiantes</i> sp.            | IZ-49748        | <a href="http://mczbase.mcz.harvard.edu/guid/MCZ:IZ:49748">http://mczbase.mcz.harvard.edu/guid/MCZ:IZ:49748</a>   |
|                         | Cosmetidae                    | <i>Vonones ornata</i>             | IZ-49750        | <a href="http://mczbase.mcz.harvard.edu/guid/MCZ:IZ:49750">http://mczbase.mcz.harvard.edu/guid/MCZ:IZ:49750</a>   |
|                         | Cranidae                      | <i>Phareicranaus manauara</i>     | IZ-136554       | <a href="http://mczbase.mcz.harvard.edu/guid/MCZ:IZ:136554">http://mczbase.mcz.harvard.edu/guid/MCZ:IZ:136554</a> |
|                         | Cryptogobiidae                | <i>Pseudopachylus longipes</i>    | IZ-32171        | <a href="http://mczbase.mcz.harvard.edu/guid/MCZ:IZ:32171">http://mczbase.mcz.harvard.edu/guid/MCZ:IZ:32171</a>   |
|                         | Epedanidae                    | <i>Dibunus</i> sp.                |                 |                                                                                                                   |
|                         | Escadabiidae                  | <i>Escadabius</i> n.sp.           | IZ-136543       | <a href="http://mczbase.mcz.harvard.edu/guid/MCZ:IZ:136543">http://mczbase.mcz.harvard.edu/guid/MCZ:IZ:136543</a> |
|                         | Fissiphallidae                | <i>Fissiphallus martensi</i>      | IZ-136546       | <a href="http://mczbase.mcz.harvard.edu/guid/MCZ:IZ:136546">http://mczbase.mcz.harvard.edu/guid/MCZ:IZ:136546</a> |
|                         | Gonyleptidae                  | <i>Metagyndes innata</i>          |                 |                                                                                                                   |
|                         | Manaosbiidae                  | <i>Saramacia lucasae</i>          | IZ-136518       | <a href="http://mczbase.mcz.harvard.edu/guid/MCZ:IZ:136518">http://mczbase.mcz.harvard.edu/guid/MCZ:IZ:136518</a> |
|                         | Petrobunidae                  | <i>Petrobunus schwendingeri</i>   |                 |                                                                                                                   |
|                         | Phalangodidae                 | <i>Sitalcina lobata</i>           | --              |                                                                                                                   |
|                         | Podoctidae                    | <i>Metibalonius</i> sp.           | ASSIGN          |                                                                                                                   |
|                         | Podoctidae                    | <i>Idzubius akiyamae</i>          | IZ-49771        | <a href="http://mczbase.mcz.harvard.edu/guid/MCZ:IZ:49771">http://mczbase.mcz.harvard.edu/guid/MCZ:IZ:49771</a>   |
|                         | Samoidae                      | <i>Pellobunus</i> sp.             | IZ-31593        | <a href="http://mczbase.mcz.harvard.edu/guid/MCZ:IZ:31593">http://mczbase.mcz.harvard.edu/guid/MCZ:IZ:31593</a>   |
|                         | Sandokanidae                  | <i>Gnomulus</i> sp.               |                 |                                                                                                                   |
|                         | Stygnidae                     | <i>Protimesius longipalpis</i>    | IZ-136522       | <a href="http://mczbase.mcz.harvard.edu/guid/MCZ:IZ:136522">http://mczbase.mcz.harvard.edu/guid/MCZ:IZ:136522</a> |
|                         | Stygnopsidae                  | <i>Chapulobunus unispinosus</i>   | IZ-46443        | <a href="http://mczbase.mcz.harvard.edu/guid/MCZ:IZ:46443">http://mczbase.mcz.harvard.edu/guid/MCZ:IZ:46443</a>   |
|                         | Zalmoxidae                    | <i>Pachylicus acutus</i>          | IZ-49749        | <a href="http://mczbase.mcz.harvard.edu/guid/MCZ:IZ:49749">http://mczbase.mcz.harvard.edu/guid/MCZ:IZ:49749</a>   |
| <b>OUTGROUPS</b>        | Zalmoxidae                    | <i>Zalmoxis gebeleizis</i>        |                 |                                                                                                                   |
|                         | Chelicerata, Pycnogonida      | <i>Anoplodactylus insignis</i>    |                 | Fernández et al. (2016)                                                                                           |
|                         | Chelicerata, Ricinulei        | <i>Pseudocellus karschii</i>      |                 | Sharma et al. (2014)                                                                                              |
|                         | Chelicerata, Ricinulei        | <i>Ricinoides atewa</i>           |                 | Sharma et al. (2014)                                                                                              |
|                         | Chelicerata, Solifugae        | <i>Eremobates</i> sp.             |                 | Sharma et al. (2014)                                                                                              |
|                         | Chelicerata, Pseudoscorpiones | <i>Synsphyronus apimelus</i>      |                 | Sharma et al. (2014)                                                                                              |
|                         | Chelicerata, Acariformes      | <i>Tetranychus urticae</i>        |                 | genome                                                                                                            |
|                         | Chelicerata, Parasitiformes   | <i>Ixodes scapularis</i>          |                 | genome                                                                                                            |
|                         | Chelicerata, Xiphosura        | <i>Limulus polyphemus</i>         |                 | genome                                                                                                            |
|                         | Crustacea, Branchiopoda       | <i>Daphnia pulex</i>              |                 | genome                                                                                                            |
|                         | Myriapoda, Chilopoda          | <i>Scutigera coleoptrata</i>      |                 | Fernández et al. (2014)                                                                                           |
|                         | Onychophora                   | <i>Peripatopsis overbergensis</i> |                 | Sharma et al. (2014)                                                                                              |
